# Supplementary material for: Catalytic asymmetric oxidative carbonylation-induced kinetic resolution of sterically hindered benzylamines to chiral isoindolinones
Source: Royal Society of Chemistry journal article supplement (doi:10.1039/d0cc07218d), 2021-01-01
Supplement: d0cc07218d1.pdf [file d0cc07218d1.pdf]

## Supporting Information

# Catalytic asymmetric oxidative carbonylation –induced kinetic resolution of sterically hindered benzylamines to chiral isoindolinones

Qiu-Qi Mu<sup>‡a,b,c</sup>, Yi-Xue Nie<sup>‡b</sup>, Hang Li<sup>‡b</sup>, Xing-Feng Bai<sup>\*b,c</sup>, Xue-Wei Liu<sup>a,d</sup>,  
Zheng Xu<sup>b</sup>, and Li-Wen Xu<sup>\*b,c</sup>

<sup>a</sup> *Institute of Advanced Synthesis (IAS), Northwestern Polytechnical University (NPU), Xi'an 710072, China. Yangtze River Delta Research Institute of NPU, Taicang Jiangsu, 215400, China.*

<sup>b</sup> *Key Laboratory of Organosilicon Chemistry and Material Technology of Ministry of Education, and Key Laboratory of Organosilicon Material Technology of Zhejiang Province, Hangzhou Normal University, Hangzhou 311121, P. R. China*

<sup>c</sup> *State Key Laboratory for Oxo Synthesis and Selective Oxidation, Suzhou Research Institute (SRI), Lanzhou Institute of Chemical Physics (LICP), University of the Chinese Academy of Sciences (UCAS), Lanzhou 730000, P. R. China*

<sup>e</sup> *Division of Chemistry and Biological Chemistry, School of Physical and Mathematical Sciences, Nanyang Technological University, Singapore 637371*

\*[liwenxu@hznu.edu.cn](mailto:liwenxu@hznu.edu.cn), [xuewei@ntu.edu.sg](mailto:xuewei@ntu.edu.sg)

‡ (Q.-Q. Mu, Y.-X. Nie) *These authors contributed equally.*

## Table of Contents

|                                                                                             |     |
|---------------------------------------------------------------------------------------------|-----|
| 1. General Considerations .....                                                             | S2  |
| 2. Experimental procedures and Compound characterizations .....                             | S3  |
| 2.1 General procedure for the preparation of <i>rac</i> -1a-k and characterization data ... | S3  |
| 2.2 Kinetic resolution of Benzylamines and characterization data .....                      | S10 |
| 3. Computational studies .....                                                              | S25 |
| 4. X-ray structure of ( <i>S</i> )-2h .....                                                 | S52 |
| 5. Reference .....                                                                          | S52 |
| 6. NMR Spectra .....                                                                        | S53 |
| 7. HPLC Chromatograms .....                                                                 | S75 |

### 1. General Considerations

Unless specifically stated, all commercial materials and solvents were used without further purification. Reactions were monitored by thin layer chromatography (TLC) using silica gel plates. Flash column chromatography was performed over silica (300 - 400 mesh). Nuclear magnetic resonance (NMR) spectra were recorded with Bruker 400 MHz spectrometer.  $^1\text{H}$  and  $^{13}\text{C}$  chemical shifts are reported in ppm downfield of tetramethylsilane and referenced to residual solvent peak ( $\text{CDCl}_3$ ,  $\delta\text{H} = 7.26$  and  $\delta\text{C} = 77.16$ ). Multiplicities were given as: s (singlet); d (doublet); dd (doublets of doublet); t (triplet); q (quartet); or m (multiplets). High resolution mass spectra (HRMS) of the products were obtained on a Bruker Daltonics micro TOF-spectrometer. Enantiomeric excesses were determined on an Agilent 1260 Chiral HPLC using AD, OD columns. Optical rotations were obtained on a SGW-3 polarimeter. Computational study was conducted using Gauss 09 with B3LYP and the LANL2DZ basis set for Pd and Cs, 6-31G(d,p) basis set for other atoms. Activation free energies are given in kcal/mol. Infrared spectra (FT-IR) were recorded using a BRUKER VERTEX 70 Spectrometer and analyzed as thin films, with absorption maxima ( $\nu_{\text{max}}$ ) being quoted in wavenumbers ( $\text{cm}^{-1}$ ); Melting points (m.p.) were recorded using a JM 628 X-4 melting point apparatus.

## 2. Experimental procedures and Compound characterizations

### 2.1 General procedure for the preparation of *rac*-1a-k and characterization data

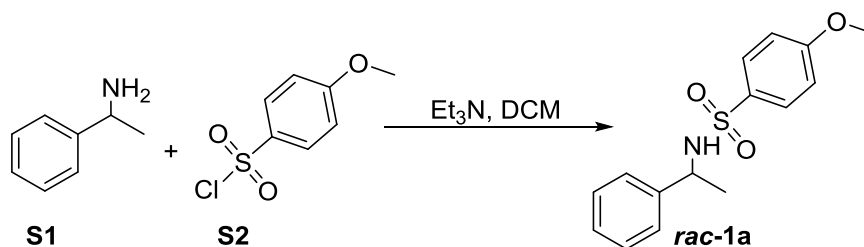

Procedure A: synthesis of *rac*-1a. Following a literature procedure<sup>[1]</sup>. To a solution of **S1** phenylethylamine (5 mmol, 1.0 equiv.) and triethylamine (7.5 mmol, 1.5 equiv.) in CH<sub>2</sub>Cl<sub>2</sub> (30 mL) at 0 °C was added drop wise a solution of the corresponding **S2** sulfonyl chloride (6 mmol, 1.2 equiv) in CH<sub>2</sub>Cl<sub>2</sub> (10 mL). The resulting solution was stirred at room temperature for overnight. Water (50 mL) was added, and the aqueous layer was extracted with dichloromethane (3 × 20 mL). The combined organic layer was dried (Na<sub>2</sub>SO<sub>4</sub>) and concentrated, the product *rac*-1a was obtained through chromatography.

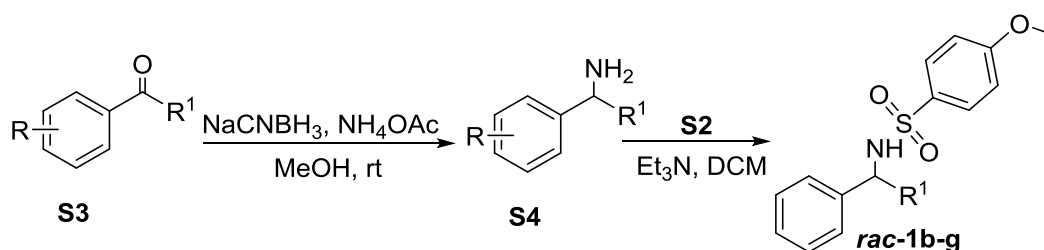

Procedure B: synthesis of *rac*-1b-g. Following a literature procedure<sup>[2,3]</sup>. **S3** Ketone (10 mmol, 1.0 equiv), ammonium acetate (60 mmol, 6.0 equiv) and sodium cyanoborohydride (NaCNBH<sub>3</sub>) (15 mmol, 1.5 equiv) were dissolved in MeOH (30 mL) and the solution was stirred at room temperature for overnight. After removing the solvents in vacuo, the residue was dissolved in 4M NaOH (50 mL) and extracted with CH<sub>2</sub>Cl<sub>2</sub> (3×30 mL). The combined layers were concentrated and extracted with 6M HCl (3×30 mL). The aqueous layer was basified with concentrated NaOH and extracted with CH<sub>2</sub>Cl<sub>2</sub> (3×30 mL). The combined organic layers were dried over anhydrous Na<sub>2</sub>SO<sub>4</sub> and evaporated under reduced pressured to give crude amine **S4**,

which could be used directly in the next step without further purification.

To a solution of crude amine **S4** and triethylamine (1.5 equiv.) in CH<sub>2</sub>Cl<sub>2</sub> (30 mL) at 0 °C was added drop wise a solution of the corresponding **S2** sulfonyl chloride (1.2 equiv) in CH<sub>2</sub>Cl<sub>2</sub> (10 mL). The resulting solution was stirred at room temperature for overnight. Water (50 mL) was added, and the aqueous layer was extracted with CH<sub>2</sub>Cl<sub>2</sub> (3 × 20 mL). The combined organic layer was dried (Na<sub>2</sub>SO<sub>4</sub>) and concentrated, the product **rac-1b-g** was obtained through chromatography.

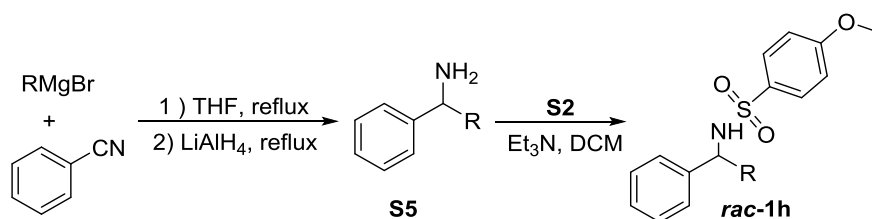

Procedure C: synthesis of **rac-1g**. Following a literature procedure <sup>[4,5]</sup>. To a flame-dried 100 mL three-necked round-bottomed flask, aryl nitrile (10 mmol, 1.0 equiv.) and THF (20 mL) was added. Fill the flask with argon and equip with a refluxing condenser. Cool down the solution to 0 °C and then add the corresponding Grignard reagent (12 mmol, 1.2 equiv.) slowly. The reaction mixture was heated to reflux for 24 h and then cooled to 0 °C. To this mixture was transferred a suspension of LiAlH<sub>4</sub> (10 mmol, 1.0 equiv) in THF (20 mL) and heated to reflux, which was maintained for 12 h. The reaction mixture was cooled to 0 °C, and carefully quenched by slow addition of water (1 mL), then 10 % aq NaOH (1 mL), and finally water (2 mL). The mixture was filtered through a Celite pad and washed with DCM. The combined organic layer was washed with brine and dried over Na<sub>2</sub>SO<sub>4</sub>, filtered and concentrated under reduce pressure to afford crude amine **S5**, which could be used directly in the next step without further purification.

To a solution of crude amine **S5** and triethylamine (1.5 equiv.) in CH<sub>2</sub>Cl<sub>2</sub> (30 mL) at 0 °C was added drop wise a solution of the corresponding **S2** sulfonyl chloride (1.2 equiv) in CH<sub>2</sub>Cl<sub>2</sub> (10 mL). The resulting solution was stirred at room temperature for overnight. Water (50 mL) was added, and the aqueous layer was extracted with CH<sub>2</sub>Cl<sub>2</sub> (3 × 20 mL). The combined organic layer was dried (Na<sub>2</sub>SO<sub>4</sub>) and concentrated, the product **rac-1h** was obtained through chromatography.

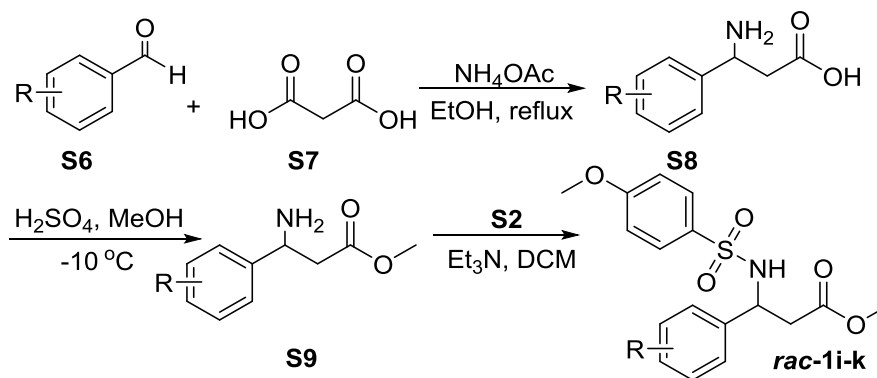

Procedure D: synthesis of *rac-1i-1k*. Following a literature procedure<sup>[6]</sup>. In a 50 mL round bottom flask, benzaldehyde **S6** (10 mmol, 1.0 equiv) was dissolved in ethanol (10 mL). Malonic acid **S7** (10 mmol, 1.0 equiv) and ammonium acetate (20 mmol, 2.0 equiv) were added to the reaction and the resulting mixture was reflux for overnight. After stirring overnight, the reaction mixture was allowed to cool to room temperature and the resulting solid was filtered. The solid was washed with methanol and dried in vacuo to give the intermediate **S8**.

**S8** was added to a round bottom flask followed by addition of methanol. The reaction mixture was cooled to  $-10\text{ }^\circ\text{C}$  followed by the addition of conc. sulfuric acid (0.4 mL) in one portion. The reaction mixture was stirred at room temperature for 6 h and concentrated in vacuo. The reaction mixture was treated with sodium hydroxide solution (2.0 M) and extracted with  $\text{CH}_2\text{Cl}_2$  ( $3 \times 20\text{ mL}$ ). The combined organic phase was dried over  $\text{Na}_2\text{SO}_4$  and concentrated in vacuo to give the product **S9**, which could be used directly in the next step without further purification.

To a solution of crude amine **S9** and triethylamine (1.5 equiv.) in  $\text{CH}_2\text{Cl}_2$  (30 mL) at  $0\text{ }^\circ\text{C}$  was added drop wise a solution of the corresponding **S2** sulfonyl chloride (1.2 equiv) in  $\text{CH}_2\text{Cl}_2$  (10 mL). The resulting solution was stirred at room temperature for overnight. Water (50 mL) was added, and the aqueous layer was extracted with  $\text{CH}_2\text{Cl}_2$  ( $3 \times 20\text{ mL}$ ). The combined organic layer was dried ( $\text{Na}_2\text{SO}_4$ ) and concentrated, the product *rac-1i-k* were obtained through chromatography.

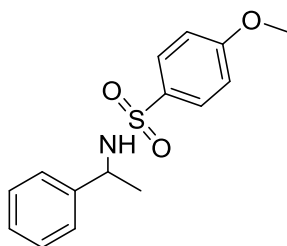

**4-methoxy-*N*-(1-phenylethyl)benzenesulfonamide (*rac*-1a)**<sup>[7]</sup>

White solid, 1.25 g, 85% yield. Analytical data for **1a**: <sup>1</sup>H NMR (400 MHz, CDCl<sub>3</sub>) δ 7.66 (d, *J* = 8.0 Hz, 2H), 7.19 (t, *J* = 8.0, 4.0 Hz, 3H), 7.11 (d, *J* = 4.0 Hz, 2H), 6.84 (d, *J* = 8.0 Hz, 2H), 5.00 (s, 1H), 4.48-4.41 (m, 1H), 3.82 (s, 3H), 1.42 (d, *J* = 4.0 Hz, 3H). <sup>13</sup>C NMR (100 MHz, CDCl<sub>3</sub>) δ 162.6, 142.1, 132.3, 129.1, 128.5, 127.4, 126.1, 113.9, 55.5, 53.6, 23.5. HRMS (ESI-TOF) Calcd for C<sub>15</sub>H<sub>17</sub>NNaO<sub>3</sub>S [M+Na]<sup>+</sup>: 314.0821, found: 314.0829.

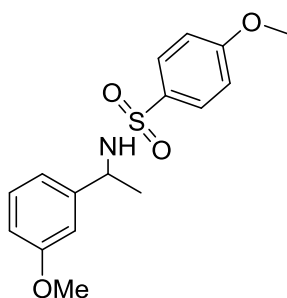

**4-methoxy-*N*-(1-(3-methoxyphenyl)ethyl)benzenesulfonamide (*rac*-1b)**

White solid, 65% yield, mp: 95-98 °C. Analytical data for **1b**: <sup>1</sup>H NMR (400 MHz, CDCl<sub>3</sub>) δ 7.66 (d, *J* = 8.0 Hz, 2H), 7.09 (d, *J* = 4.0, 1H), 6.83-6.81 (t, *J* = 4.0 Hz, 2H), 6.70-6.68 (m, 2H), 6.60 (t, *J* = 4.0 Hz, 1H), 5.34 (d, *J* = 8.0, 1H), 4.44-4.37 (m, 1H), 3.82 (s, 3H), 3.69 (s, 3H), 1.40 (d, *J* = 4.0 Hz, 3H). <sup>13</sup>C NMR (100 MHz, CDCl<sub>3</sub>) δ 162.8, 159.8, 143.9, 132.4, 129.7, 129.4, 118.6, 114.1, 113.1, 111.9, 55.8, 55.3, 53.8, 23.8. HRMS (ESI-TOF) Calcd for C<sub>16</sub>H<sub>19</sub>NNaO<sub>4</sub>S [M+Na]<sup>+</sup>: 344.0927, found: 344.0937.

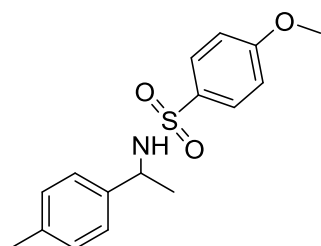

**4-methoxy-*N*-(1-(*p*-tolyl)ethyl)benzenesulfonamide (*rac*-1c)**

White solid, 70% yield. mp: 92-95 °C. Analytical data for **1c**: <sup>1</sup>H NMR (400 MHz, CDCl<sub>3</sub>) δ 7.72-7.69 (m, 2H), 7.03 (s, 4H), 6.88-6.85 (m, 2H), 5.45 (d, *J* = 4.0 Hz, 1H), 4.46-4.39 (m, 1H), 3.86 (s, 3H), 2.30 (s, 3H), 1.44 (d, *J* = 8.0 Hz, 3H). <sup>13</sup>C NMR (100 MHz, CDCl<sub>3</sub>) δ 162.6, 139.2, 137.0, 132.3, 129.2, 129.1, 126.1, 113.9, 55.5, 53.4, 23.5, 21.0. HRMS (ESI-TOF) Calcd for C<sub>16</sub>H<sub>19</sub>NNaO<sub>3</sub>S [M+Na]<sup>+</sup>: 328.0978, found: 328.0989.

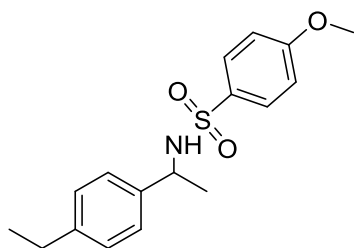

***N*-(1-(4-ethylphenyl)ethyl)-4-methoxybenzenesulfonamide (*rac*-1d)**

White solid, 75% yield, mp: 81-84 °C. Analytical data for **1d**: <sup>1</sup>H NMR (400 MHz, CDCl<sub>3</sub>) δ 7.66-7.64 (m, 2H), 7.00 (s, 4H), 6.83-6.80 (m, 2H), 5.34 (d, *J* = 8.0 Hz, 1H), 4.43-4.40 (t, *J* = 8.0, 4.0 Hz, 1H), 3.82 (s, 3H), 2.59-2.53 (m, 2H), 1.41 (d, *J* = 8.0 Hz, 3H), 1.20 (t, *J* = 8.0 Hz, 3H). <sup>13</sup>C NMR (100 MHz, CDCl<sub>3</sub>) δ 162.7, 143.6, 139.5, 132.5, 129.4, 128.1, 126.3, 114.1, 55.7, 53.6, 28.6, 23.7, 15.8. HRMS (ESI-TOF) Calcd for C<sub>17</sub>H<sub>21</sub>NNaO<sub>3</sub>S [M+Na]<sup>+</sup>: 342.1134, found: 342.1149.

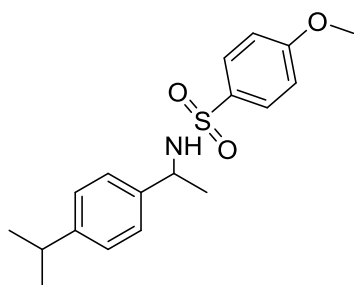

***N*-(1-(4-isopropylphenyl)ethyl)-4-methoxybenzenesulfonamide (*rac*-1e)**

White solid, 55% yield, mp: 74-77 °C. Analytical data for **1d**: <sup>1</sup>H NMR (400 MHz, CDCl<sub>3</sub>) δ 7.65-7.63 (m, 2H), 7.04-7.00 (m, 4H), 6.82-6.80 (m, 2H), 5.20 (s, 1H), 4.46-4.39 (m, 1H), 3.82 (s, 3H), 2.85-2.78 (m, 1H), 1.42 (d, *J* = 8.0 Hz, 3H), 1.20 (s, 3H), 1.18 (s, 3H). <sup>13</sup>C NMR (100 MHz, CDCl<sub>3</sub>) δ 162.5, 148.0, 139.3, 132.3, 129.2, 126.4, 126.1, 113.8, 55.5, 53.4, 33.7, 23.9, 23.5. HRMS (ESI-TOF) Calcd for

C<sub>18</sub>H<sub>23</sub>NNaO<sub>3</sub>S [M+Na]<sup>+</sup>: 356.1291, found: 356.1304.

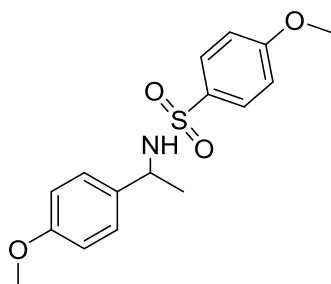

**4-methoxy-N-(1-(4-methoxyphenyl)ethyl)benzenesulfonamide (*rac*-1f)**

White solid, 53% yield, mp: 114-117 °C. Analytical data for **1f**: <sup>1</sup>H NMR (400 MHz, CDCl<sub>3</sub>) δ 7.66-7.63 (m, 2H), 7.02 (t, *J* = 8.0, 4.0 Hz, 2H), 6.85-6.82 (m, 2H), 6.73-6.69 (m, 2H), 4.99 (d, *J* = 8.0 Hz, 1H), 4.41 (t, *J* = 8.0 Hz, 1H), 3.83 (s, 3H), 3.74 (s, 3H), 1.40 (d, *J* = 4.0 Hz, 3H). <sup>13</sup>C NMR (100 MHz, CDCl<sub>3</sub>) δ 163.1, 159.4, 134.7, 132.8, 129.7, 127.8, 114.4, 114.4 (d, *J* = 9.0 Hz), 56.1, 55.8, 53.6, 24.0. HRMS (ESI-TOF) Calcd for C<sub>16</sub>H<sub>19</sub>NNaO<sub>4</sub>S [M+Na]<sup>+</sup>: 344.0927, found: 344.0936.

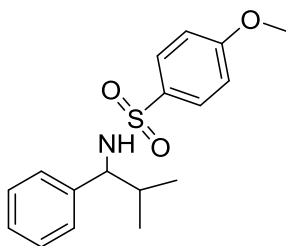

**4-methoxy-N-(2-methyl-1-phenylpropyl)benzenesulfonamide (*rac*-1g)**

White solid, 79% yield, mp: 117-120 °C. Analytical data for **1g**: <sup>1</sup>H NMR (400 MHz, CDCl<sub>3</sub>) δ 7.59-7.55 (m, 2H), 7.13-7.12 (m, 3H), 6.98-6.96 (m, 2H), 6.75 (t, *J* = 8.0, 4.0 Hz, 2H), 5.57 (d, *J* = 12.0 Hz, 1H), 4.05 (t, *J* = 8.0 Hz, 1H), 3.81 (s, 3H), 1.99-1.90 (m, 1H), 0.99 (d, *J* = 8.0 Hz, 3H), 0.76 (d, *J* = 8.0 Hz, 3H). <sup>13</sup>C NMR (100 MHz, CDCl<sub>3</sub>) δ 162.6, 140.2, 132.5, 129.3, 128.3, 127.2, 127.2, 113.9, 64.4, 55.7, 34.6, 19.6, 19.1. HRMS (ESI-TOF) Calcd for C<sub>17</sub>H<sub>21</sub>NNaO<sub>3</sub>S [M+Na]<sup>+</sup>: 342.1134, found: 342.1133.

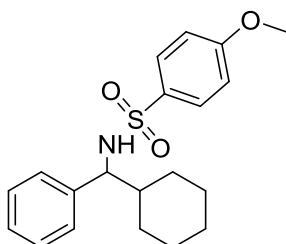



***N*-(cyclohexyl (phenyl)methyl)-4-methoxybenzenesulfonamid (*rac*-1h)**

White solid, 68% yield, mp: 153-156 °C. Analytical data for **1h**: <sup>1</sup>H NMR (400 MHz, CDCl<sub>3</sub>) δ 7.54-7.50 (m, 2H), 7.10-7.06 (m, 3H), 6.93-6.90 (m, 2H), 6.71-6.67 (m, 2H), 5.58 (d, *J* = 12.0 Hz, 1H), 4.02 (t, *J* = 8.0 Hz, 1H), 3.98 (s, 3H), 1.98 (d, *J* = 12.0 Hz, 1H), 1.72 (t, *J* = 12.0 Hz, 1H), 1.58-1.50 (m, 3H), 1.28 (d, *J* = 12.0 Hz, 1H), 1.16-1.03 (m, 3H), 0.98-0.82 (m, 2H). <sup>13</sup>C NMR (100 MHz, CDCl<sub>3</sub>) δ 162.5, 140.2, 132.6, 129.3, 128.3, 127.2, 127.1, 113.9, 63.7, 55.7, 43.9, 30.0, 29.7, 26.4, 26.1. HRMS (ESI-TOF) Calcd for C<sub>20</sub>H<sub>25</sub>NNaO<sub>3</sub>S [M+Na]<sup>+</sup>: 382.1447, found: 382.1437.

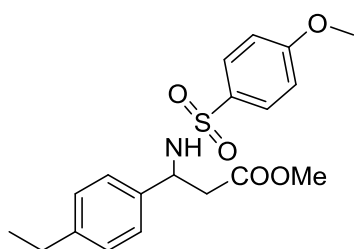

**Methyl 3-(4-ethylphenyl)-3-((4-methoxyphenyl)sulfonamide)propanoate (*rac*-1i)**

White solid, 45% yield, mp: 86-89 °C. Analytical data for **1i**: <sup>1</sup>H NMR (400 MHz, CDCl<sub>3</sub>) δ 7.65-7.61 (m, 2H), 7.00 (s, 4H), 6.84-6.81 (m, 2H), 5.70 (d, *J* = 8.0 Hz, 1H), 4.71 (m, 1H), 3.82 (s, 3H), 3.57 (s, 3H), 2.89 (dd, *J* = 16.0, 8.0 Hz, 1H), 2.79 (dd, *J* = 16.0, 8.0 Hz, 1H), 2.59 (q, *J* = 8.0 Hz, 2H). <sup>13</sup>C NMR (100 MHz, CDCl<sub>3</sub>) δ 171.1, 162.6, 143.8, 136.5, 131.9, 129.2, 128.0, 126.4, 113.9, 55.5, 54.1, 51.9, 41.1, 28.4, 15.5. HRMS (ESI-TOF) Calcd for C<sub>19</sub>H<sub>23</sub>NNaO<sub>5</sub>S [M+Na]<sup>+</sup>: 400.1189, found: 400.1178.

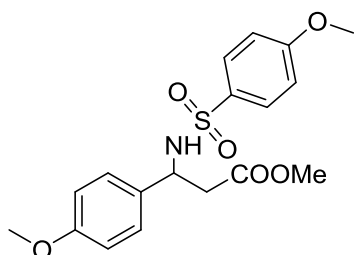

**Methyl 3-(4-methoxyphenyl)-3-((4-methoxyphenyl)sulfonamide)propanoate (*rac*-1j)**

White solid, 49% yield, mp: 94-97 °C. Analytical data for **1j**: <sup>1</sup>H NMR (400 MHz, CDCl<sub>3</sub>) δ 7.65-7.61 (m, 2H), 7.02 (d, *J* = 8.0 Hz, 2H), 6.84-6.82 (m, 2H), 6.71-6.69

(m, 2H), 5.74 (d,  $J = 8.0$  Hz, 1H), 4.69-4.64 (m, 1H), 3.83 (s, 3H), 3.74 (s, 3H), 3.56 (s, 3H), 2.88 (dd,  $J = 16.0, 8.0$  Hz, 1H), 2.77 (dd,  $J = 16.0, 8.0$  Hz, 1H).  $^{13}\text{C}$  NMR (100 MHz,  $\text{CDCl}_3$ )  $\delta$  171.2, 162.7, 159.1, 132.0, 131.4, 129.3, 127.7, 114.0, 113.9, 55.6, 55.2, 53.9, 51.9, 41.3. HRMS (ESI-TOF) Calcd for  $\text{C}_{18}\text{H}_{21}\text{NNaO}_6\text{S}$   $[\text{M}+\text{Na}]^+$ : 402.0982, found: 402.0991.

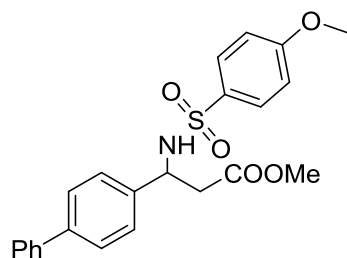

**Methyl 3-((1,1'-biphenyl)-4-yl)-3-((4-methoxyphenyl)sulfonamide)propanoate (*rac*-1k)**

White solid, 51% yield, mp: 152-155 °C. Analytical data for **1k**:  $^1\text{H}$  NMR (400 MHz,  $\text{CDCl}_3$ )  $\delta$  7.64-7.62 (m, 2H), 7.52-7.49 (m, 2H), 7.44-7.32 (m, 5H), 7.17 (d,  $J = 8.0$  Hz, 2H), 6.81-6.79 (m, 2H), 5.85 (d,  $J = 8.0$  Hz, 1H), 4.81 (q,  $J = 8.0$  Hz, 1H), 3.74 (s, 3H), 3.59 (s, 3H), 2.92 (dd,  $J = 16.0, 4.0$  Hz, 1H), 2.84 (dd,  $J = 16.0, 8.0$  Hz, 1H).  $^{13}\text{C}$  NMR (100 MHz,  $\text{CDCl}_3$ )  $\delta$  171.1, 162.7, 140.6, 140.4, 138.2, 133.8, 131.9, 129.2, 128.8, 127.4, 127.2, 127.0, 126.9, 115.1, 113.9, 55.5, 54.1, 52.0, 41.0. HRMS (ESI-TOF) Calcd for  $\text{C}_{23}\text{H}_{23}\text{NNaO}_5\text{S}$   $[\text{M}+\text{Na}]^+$ : 448.1189, found: 448.1175.

## 2.2 Kinetic resolution of Benzylamines and characterization data

### Optimization of reaction conditions

**Table S1.** Screening of Protecting groups <sup>a</sup>

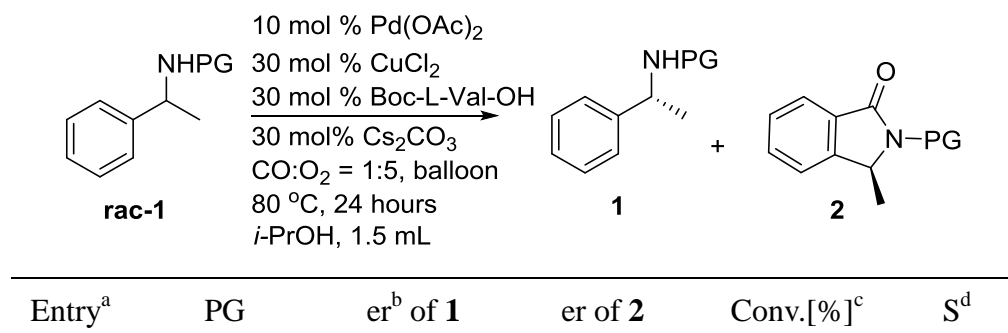

|                |     |       |       |                   |      |
|----------------|-----|-------|-------|-------------------|------|
| 1              | Ms  | 93:7  | 90:10 | 52                | 23.8 |
| 2 <sup>f</sup> | Ans | 91:9  | 92:8  | 49                | 32.1 |
| 3 <sup>g</sup> | Ns  | 82:18 | 88:12 | 46                | 13.5 |
| 4              | Tf  | 70:30 | 90:10 | 33                | 14.2 |
| 5              | Boc | -     | -     | N.D. <sup>e</sup> | -    |
| 6              | Ts  | 95:5  | 87:13 | 55                | 19.8 |

<sup>a</sup>Reaction conditions: **rac-1** (0.1 mmol), Pd(OAc)<sub>2</sub> (10 mmol%), CuCl<sub>2</sub> (30 mmol%), Boc-L-Val-OH (30 mmol%), Cs<sub>2</sub>CO<sub>3</sub> (30 mmol%), CO/O<sub>2</sub>=1:5 (1 atm), *i*-PrOH (1.0 mL), 80 °C, 48 h. <sup>b</sup>Determined by HPLC analysis on a chiral stationary phase. <sup>c</sup>Determined by HPLC analysis on a chiral stationary phase. Conversion (C) = ee<sub>1</sub>/(ee<sub>1</sub>+ee<sub>2</sub>), where ee<sub>1</sub> is the enantiomeric excess of the recovered **1** and ee<sub>2</sub> is the enantiomeric excess of **2**. <sup>d</sup>s = ln[(1-C)(1-ee)]/ln[(1-C)(1+ee)], where ee = ee<sub>1</sub>/100 and C = conversion/100. s = selectivity factor. <sup>e</sup>N.D.= not determined. <sup>f</sup>Ans = 4-methoxybenzenesulfonamide. <sup>g</sup>Ns = 4-nitrobenzenesulfonamide.

**Table S2.** Additional ligand screening<sup>a</sup>

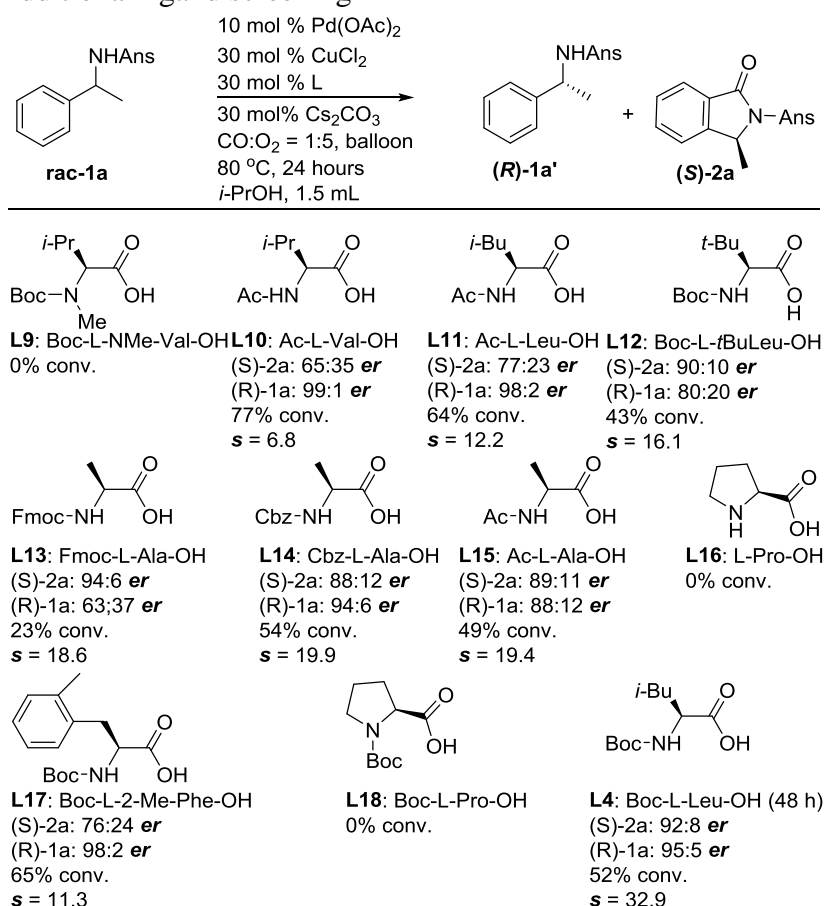

<sup>a</sup>Reaction conditions: **rac-1** (0.1 mmol), Pd(OAc)<sub>2</sub> (10 mmol%), CuCl<sub>2</sub> (30 mmol%), Ligand (30 mmol%), Cs<sub>2</sub>CO<sub>3</sub> (30 mmol%), CO/O<sub>2</sub>=1:5 (1 atm), *i*-PrOH (1.0 mL), 80 °C, 48 h. <sup>b</sup>Determined by HPLC analysis on a chiral stationary phase. <sup>c</sup>Determined by HPLC analysis on a chiral stationary phase. Conversion (C) = ee<sub>1</sub>/(ee<sub>1</sub>+ee<sub>2</sub>), where ee<sub>1</sub> is the enantiomeric excess of the recovered **1** and ee<sub>2</sub> is the enantiomeric excess of **2**. <sup>d</sup>s = ln[(1-C)(1-ee)]/ln[(1-C)(1+ee)], where ee = ee<sub>1</sub>/100 and C = conversion/100. s = selectivity factor.

**Table S3.** Screening of Pd catalyst <sup>a</sup>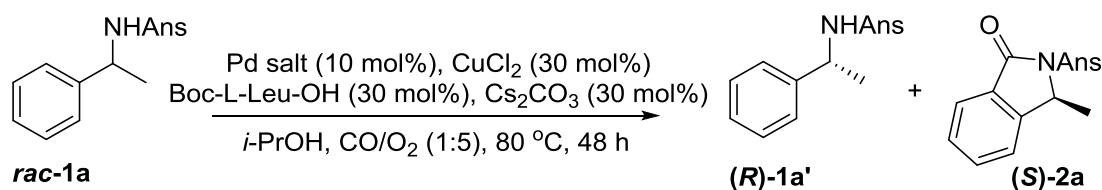

| Entry <sup>a</sup> | Pd salt                                             | Er [%] <sup>b</sup> |           | Conv.[%] <sup>c</sup> | s <sup>d</sup> |
|--------------------|-----------------------------------------------------|---------------------|-----------|-----------------------|----------------|
|                    |                                                     | <b>1a'</b>          | <b>2a</b> |                       |                |
| 1                  | PdCl <sub>2</sub>                                   | -                   | -         | 0                     | -              |
| 2                  | Pd(TFA) <sub>2</sub>                                | -                   | -         | 0                     | -              |
| 3                  | Pd(CH <sub>3</sub> CN) <sub>2</sub> Cl <sub>2</sub> | 52:48               | 94:6      | 4                     | 51             |

<sup>a</sup>Reaction conditions: **rac-1a** (0.1 mmol), Pd salt (10 mmol%), CuCl<sub>2</sub> (30 mmol%), Boc-L-Leu-OH (30 mmol%), Cs<sub>2</sub>CO<sub>3</sub> (30 mmol%), CO/O<sub>2</sub>=1:5 (1 atm), *i*-PrOH (1.0 mL), 80 °C, 48 h. <sup>b</sup>Determined by HPLC analysis on a chiral stationary phase. <sup>c</sup>Determined by HPLC analysis on a chiral stationary phase. Conversion (*C*) =  $ee_1/(ee_1+ee_2)$ , where  $ee_1$  is the enantiomeric excess of the recovered **1a'** and  $ee_2$  is the enantiomeric excess of **2a**. <sup>d</sup> $s = \ln[(1-C)(1-ee)]/\ln[(1-C)(1+ee)]$ , where  $ee = ee_1/100$  and  $C = \text{conversion}/100$ . *s* = selectivity factor.

**Table S4.** Screening of Cu salts<sup>a</sup>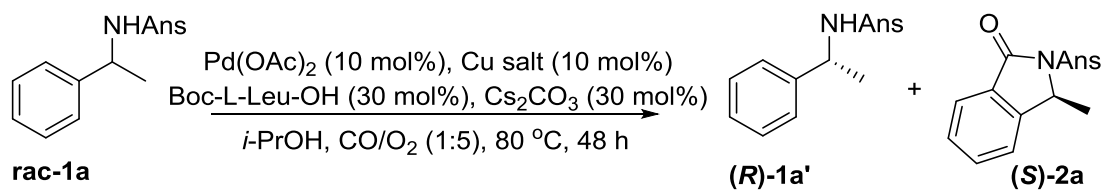

| Entry <sup>a</sup> | Cu salt                                 | Er [%] <sup>b</sup> |           | Conv.[%] <sup>c</sup> | s <sup>d</sup> |
|--------------------|-----------------------------------------|---------------------|-----------|-----------------------|----------------|
|                    |                                         | <b>1a</b>           | <b>2a</b> |                       |                |
| 1                  | Cu(OAc) <sub>2</sub>                    | 68:32               | 87:13     | 33                    | 9.1            |
| 2                  | Cu(TFA) <sub>2</sub> ·XH <sub>2</sub> O | 62:38               | 91:9      | 23                    | 11.6           |
| 3                  | Cu(OTf) <sub>2</sub>                    | 56:44               | 89:11     | 13                    | 10.3           |

<sup>a</sup>Reaction conditions: **rac-1a** (0.1 mmol), Pd(OAc)<sub>2</sub> (10 mmol%), Cu salt (30 mmol%), Boc-L-Leu-OH (30 mmol%), Cs<sub>2</sub>CO<sub>3</sub> (30 mmol%), CO/O<sub>2</sub>=1:5 (1 atm), *i*-PrOH (1.0 mL), 80 °C, 48 h. <sup>b</sup>Determined by HPLC analysis on a chiral stationary phase. <sup>c</sup>Determined by HPLC analysis on a chiral stationary phase. Conversion (*C*) =  $ee_1/(ee_1+ee_2)$ , where  $ee_1$  is the enantiomeric excess of the recovered **1a'** and  $ee_2$  is the enantiomeric excess of **2a**. <sup>d</sup> $s = \ln[(1-C)(1-ee)]/\ln[(1-C)(1+ee)]$ , where  $ee = ee_1/100$  and  $C = \text{conversion}/100$ . *s* = selectivity factor.

**Table S5.** Screening of base<sup>a</sup>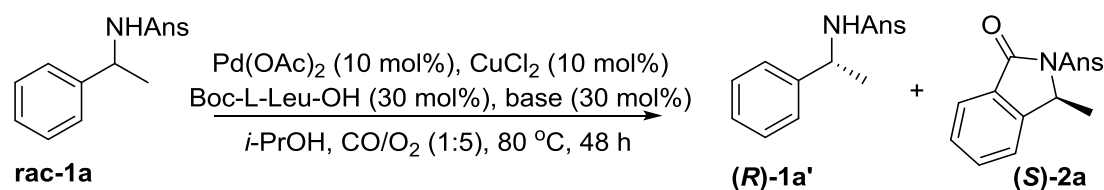

| Entry <sup>a</sup> | Base                     | Er [%] <sup>b</sup> |           | Conv.[%] <sup>c</sup> | <i>s</i> <sup>d</sup> |
|--------------------|--------------------------|---------------------|-----------|-----------------------|-----------------------|
|                    |                          | <b>1a</b>           | <b>2a</b> |                       |                       |
| 1                  | $\text{K}_2\text{CO}_3$  | 83:17               | 94:6      | 43                    | 29.7                  |
| 2                  | $\text{CsPivO}$          | -                   | -         | 0                     | -                     |
| 3                  | $\text{Ag}_2\text{CO}_3$ | -                   | -         | 0                     | -                     |

<sup>a</sup>Reaction conditions: **rac-1a** (0.1 mmol),  $\text{Pd}(\text{OAc})_2$  (10 mmol%),  $\text{CuCl}_2$  (30 mmol%),  $\text{Boc-L-Leu-OH}$  (30 mmol%), base (30 mmol%),  $\text{CO}/\text{O}_2=1:5$  (1 atm), *i*-PrOH (1.0 mL), 80 °C, 48 h. <sup>b</sup>Determined by HPLC analysis on a chiral stationary phase. <sup>c</sup>Determined by HPLC analysis on a chiral stationary phase. Conversion (*C*) =  $ee_1/(ee_1+ee_2)$ , where  $ee_1$  is the enantiomeric excess of the recovered **1a'** and  $ee_2$  is the enantiomeric excess of **2a**. <sup>d</sup> $s = \ln[(1-C)(1-ee)]/\ln[(1-C)(1+ee)]$ , where  $ee = ee_1/100$  and *C* = conversion/100. *s* = selectivity factor.

**Table S6.** Screening of solvent<sup>a</sup>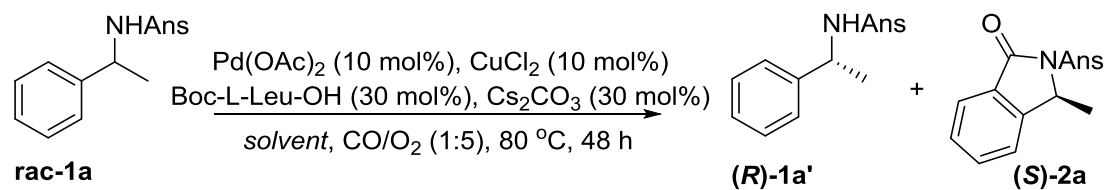

| Entry <sup>a</sup> | solvent                | Er [%] <sup>b</sup> |           | Conv.[%] <sup>c</sup> | <i>s</i> <sup>d</sup> |
|--------------------|------------------------|---------------------|-----------|-----------------------|-----------------------|
|                    |                        | <b>1a</b>           | <b>2a</b> |                       |                       |
| 1                  | $\text{CH}_3\text{CN}$ | 61:39               | 79:21     | 28                    | 4.5                   |
| 2                  | DCE                    | 51:49               | 57:43     | 13                    | 1.3                   |
| 3                  | dioxane                | 53:47               | 72:28     | 12                    | 2.7                   |
| 4                  | HFIP                   | -                   | -         | 0                     | -                     |
| 5                  | TFE                    | -                   | -         | 0                     | -                     |

<sup>a</sup>Reaction conditions: **rac-1a** (0.1 mmol),  $\text{Pd}(\text{OAc})_2$  (10 mmol%),  $\text{CuCl}_2$  (30 mmol%),  $\text{Boc-L-Leu-OH}$  (30 mmol%),  $\text{Cs}_2\text{CO}_3$  (30 mmol%),  $\text{CO}/\text{O}_2=1:5$  (1 atm), solvent (1.0 mL), 80 °C, 48 h. <sup>b</sup>Determined by HPLC analysis on a chiral stationary phase. <sup>c</sup>Determined by HPLC analysis on a chiral stationary phase. Conversion (*C*) =  $ee_1/(ee_1+ee_2)$ , where  $ee_1$  is the enantiomeric excess of the recovered **1a'** and  $ee_2$  is the enantiomeric excess of **2a**. <sup>d</sup> $s = \ln[(1-C)(1-ee)]/\ln[(1-C)(1+ee)]$ , where  $ee = ee_1/100$  and *C* = conversion/100. *s* = selectivity factor.

## Kinetic resolution of benzylamines via Pd/Cu-cocatalyzed C-H amine carbonylation

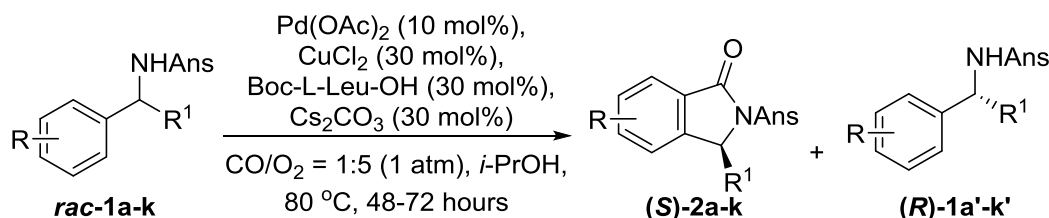

To a 25 mL reaction tube, **rac-1a-k** (0.2 mmol, 1.0 equiv.),  $\text{Pd(OAc)}_2$  (10 mol%), Boc-L-Leu-OH (30 mol%),  $\text{CuCl}_2$  (30 mol%) and  $\text{Cs}_2\text{CO}_3$  (30 mol%) were added. Evacuated the reaction tube and refilled it with the  $\text{CO/O}_2$  gas mixture through the balloon and then *i*-PrOH (3 mL) was added. The resulting solution was heated to 80 °C for 48-72 hours. After the reaction finished, cool down the mixture to room temperature and release the  $\text{CO/O}_2$  gas mixture carefully in the fume hood. The reaction mixture was passed through a short column of silica gel and eluted with EtOAc (50 ml), the eluent was concentrated under vacuum. The resulting residue was purified by column chromatography to give the desired product. The ee value was determined on a Agilent Technologies HPLC system using commercially available chiral columns as described below.

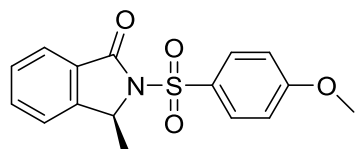

**(S)-2-((4-methoxyphenyl)sulfonyl)-3-methylisoindolin-1-one (2a)**. Following the general procedure, the product was isolated by column chromatography with petroleum ether/EA (10 : 1) as the eluent to give a semi-solid.  $^1\text{H}$  NMR (400 MHz,  $\text{CDCl}_3$ )  $\delta$  8.12 (d,  $J = 8.0$  Hz, 2H), 7.80 (d,  $J = 8.0$  Hz, 1H), 7.67 (t,  $J = 4.0, 8.0$  Hz, 1H), 7.49-7.43 (m, 2H), 7.01 (d,  $J = 8.0$  Hz, 2H), 5.34-5.29 (m, 1H), 3.87 (s, 3H), 1.81 (d,  $J = 8.0$  Hz, 3H).  $^{13}\text{C}$  NMR (100 MHz,  $\text{CDCl}_3$ )  $\delta$  166.3, 163.8, 147.4 (d,  $J = 3.6$  Hz), 134.0, 130.6, 130.5, 128.9, 128.7, 124.9, 122.1, 58.6, 55.6, 21.4. IR (neat) 2918, 2849, 1720, 1465, 1355, 1260, 1183, 1160, 1107, 1087, 1024, 832, 803, 789, 757  $\text{cm}^{-1}$ . HRMS (ESI-TOF) Calcd for  $\text{C}_{16}\text{H}_{15}\text{NNaO}_4\text{S}$   $[\text{M}+\text{Na}]^+$ : 340.0614, found:

340.0623. Optical rotation:  $[\alpha]_{\text{D}}^{25} = -12.0$  ( $c = 0.75$ ,  $\text{CHCl}_3$ ). HPLC: Chiralpak AD-H column (hexanes: isopropanol = 85:15, 1.0 mL/min, 254 nm);  $t_{\text{R}} = 30.9$  min (minor),  $t_{\text{R}} = 43.4$  min (major); 92:8 er.

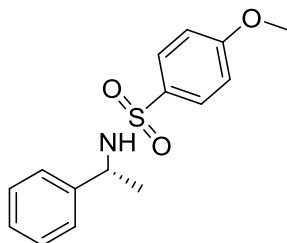

**(R)-4-methoxy-N-(1-phenylethyl)benzenesulfonamide (1a')**.  $[\alpha]_{\text{D}}^{25} = -16.1$  ( $c = 0.25$ ,  $\text{CHCl}_3$ ). HPLC: Chiralpak AD-H column (hexanes: isopropanol = 90:10, 1.0 mL/min, 254 nm);  $t_{\text{R}} = 21.1$  min (minor),  $t_{\text{R}} = 23.3$  min (major); 95:5 er.

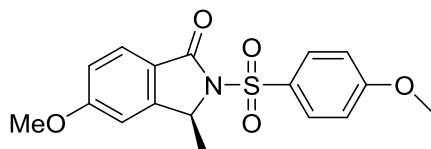

**(S)-5-methoxy-2-((4-methoxyphenyl)sulfonyl)-3-methylisoindolin-1-one (2b)**.

Following the general procedure, the product was isolated by column chromatography with petroleum ether/EA (10 : 1) as the eluent to give a semi-solid.  $^1\text{H}$  NMR (400 MHz,  $\text{CDCl}_3$ )  $\delta$  8.07 (d,  $J = 8.0$  Hz, 2H), 7.67 (d,  $J = 8.0$  Hz, 1H), 6.97-6.93 (m, 3H), 6.84 (d,  $J = 4.0$  Hz, 1H), 5.22-5.17 (m, 1H), 3.86 (s, 3H), 3.84(s, 3H), 1.75 (d,  $J = 4.0$  Hz, 3H).  $^{13}\text{C}$  NMR (100 MHz,  $\text{CDCl}_3$ )  $\delta$  165.8, 164.5, 163.5, 149.9, 130.6, 130.0, 126.3, 121.1, 116.1, 114.0, 106.6, 57.9, 55.5, 21.5. IR (neat) 1726, 1593, 1495, 1357, 1322, 1281, 1260, 1183, 1157, 1109, 1080, 1020, 832, 811, 801, 766  $\text{cm}^{-1}$ . HRMS (ESI-TOF) Calcd for  $\text{C}_{17}\text{H}_{17}\text{NNaO}_5\text{S}$   $[\text{M}+\text{Na}]^+$ : 370.0720, found: 370.0709. Optical rotation:  $[\alpha]_{\text{D}}^{25} = -16.8$  ( $c = 2.08$ ,  $\text{CHCl}_3$ ). HPLC: Chiralpak AD-H column (hexanes: isopropanol = 85:15, 1.0 mL/min, 254 nm);  $t_{\text{R}} = 16.2$  min (minor),  $t_{\text{R}} = 20.4$  min (major); 60:40 er.

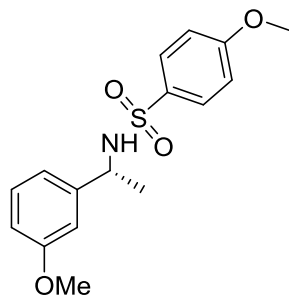

**(R)-4-methoxy-N-(1-(3-methoxyphenyl)ethyl)benzenesulfonamide (1b')**.  $[\alpha]_{\text{D}}^{25} = -43.5$  ( $c = 0.865$ ,  $\text{CHCl}_3$ ). HPLC: Chiralpak AD-H column (hexanes: isopropanol = 90:10, 1.0 mL/min, 254 nm);  $t_{\text{R}} = 24.6$  min (minor),  $t_{\text{R}} = 31.7$  min (major); 99:1 er.

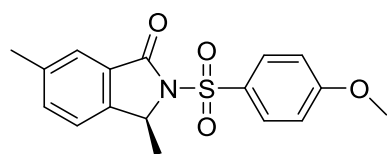

**(S)-2-((4-methoxyphenyl)sulfonyl)-3,6-dimethylisoindolin-1-one (2c)**. Following the general procedure, the product was isolated by column chromatography with petroleum ether/EA (10 : 1) as the eluent to give a semi-solid.  $^1\text{H}$  NMR (400 MHz,  $\text{CDCl}_3$ )  $\delta$  8.09 (d,  $J = 8.0$  Hz, 2H), 7.55 (s, 1H), 7.45 (d,  $J = 8.0$  Hz, 1H), 7.31 (d,  $J = 8.0$  Hz, 1H), 6.99 (d,  $J = 12.0$  Hz, 2H), 5.26-5.22 (m, 1H), 3.85 (s, 3H), 2.39 (s, 3H), 1.76 (d,  $J = 8.0$  Hz, 3H).  $^{13}\text{C}$  NMR (100 MHz,  $\text{CDCl}_3$ )  $\delta$  166.5, 163.7, 144.7, 138.9, 135.1, 130.6, 130.4, 128.9, 124.7, 122.1, 114.0, 58.4, 55.6, 21.5, 21.2. IR (neat) 2918, 1721, 1593, 1495, 1354, 1301, 1260, 1157, 1132, 1087, 1023, 925, 829, 809, 788, 744  $\text{cm}^{-1}$ . HRMS (ESI-TOF) Calcd for  $\text{C}_{17}\text{H}_{17}\text{NNaO}_4\text{S}$   $[\text{M}+\text{Na}]^+$ : 354.0770, found: 354.0760. Optical rotation:  $[\alpha]_{\text{D}}^{25} = -17.0$  ( $c = 1.02$ ,  $\text{CHCl}_3$ ). HPLC: Chiralpak AD-H column (hexanes: isopropanol = 90:10, 1.0 mL/min, 254 nm);  $t_{\text{R}} = 43.7$  min (major),  $t_{\text{R}} = 50.2$  min (minor); 87:13 er.

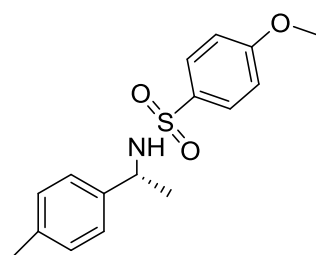

**(R)-4-methoxy-N-(1-(p-tolyl)ethyl)benzenesulfonamide (1c')**.  $[\alpha]_{\text{D}}^{25} = -37.0$  ( $c = 0.725$ ,  $\text{CHCl}_3$ ). HPLC: Chiralpak OD-H column (hexanes: isopropanol = 90:10, 0.5



mL/min, 254 nm);  $t_R = 30.4$  min (minor),  $t_R = 33.7$  min (major); 90:10 er.

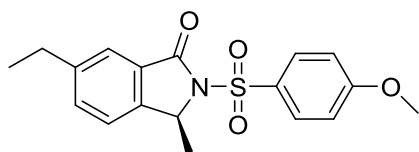

**(S)-6-ethyl-2-((4-methoxyphenyl)sulfonyl)-3-methylisoindolin-1-one (2d).**

Following the general procedure, the product was isolated by column chromatography with petroleum ether/EA (10 : 1) as the eluent to give a semi-solid.  $^1\text{H}$  NMR (400 MHz,  $\text{CDCl}_3$ )  $\delta$  8.10-8.06 (m, 2H), 7.59 (s, 1H), 7.47-7.45 (m, 1H), 7.33 (d,  $J = 8.0$  Hz, 1H), 6.99-6.96 (m, 2H), 5.27-5.22 (m, 1H), 3.85 (s, 3H), 2.72 (q,  $J = 8.0$  Hz, 2H), 1.77 (d,  $J = 8.0$  Hz, 3H), 1.23 (t,  $J = 8.0$  Hz, 3H).  $^{13}\text{C}$  NMR (100 MHz,  $\text{CDCl}_3$ )  $\delta$  166.7, 163.9, 145.5, 145.0, 134.2, 130.8, 130.6, 129.1, 123.7, 122.3, 114.1, 58.6, 55.7, 28.6, 21.6, 15.5. IR (neat) 1727, 1594, 1495, 1438, 1346, 1324, 1302, 1258, 1183, 1158, 1085, 1021, 833, 802, 767  $\text{cm}^{-1}$ . HRMS (ESI-TOF) Calcd for  $\text{C}_{15}\text{H}_{21}\text{NNaO}_6\text{S}$   $[\text{M}+\text{Na}]^+$ : 366.0982, found: 368.0994. Optical rotation:  $[\alpha]_{\text{D}}^{25} = -21.3$  ( $c = 1.5$ ,  $\text{CHCl}_3$ ). HPLC: Chiralpak AD-H column (hexanes: isopropanol = 90:10, 1.0 mL/min, 254 nm);  $t_R = 33.5$  min (major),  $t_R = 43.8$  min (minor); 95:5 er.

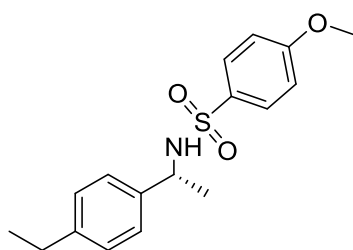

**(R)-N-(1-(4-ethylphenyl)ethyl)-4-methoxybenzenesulfonamide (1d').**  $[\alpha]_{\text{D}}^{25} = -10.5$  ( $c = 0.25$ ,  $\text{CHCl}_3$ ). HPLC: Chiralpak AD-H column (hexanes: isopropanol = 90:10, 0.5 mL/min, 254 nm);  $t_R = 35.1$  min (major),  $t_R = 38.3$  min (minor); 81:19 er.

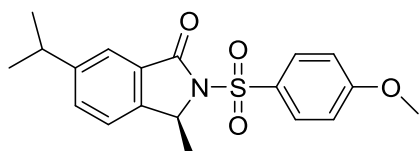

**(S)-6-isopropyl-2-((4-methoxyphenyl)sulfonyl)-3-methylisoindolin-1-one (2e).**

Following the general procedure, the product was isolated by column chromatography with petroleum ether/EA (10 : 1) as the eluent to give a semi-solid.  $^1\text{H}$  NMR (400

MHz, CDCl<sub>3</sub>) δ 8.10-8.06 (m, 2H), 7.62 (s, 1H), 7.51-7.48 (m, 1H), 7.34 (d, *J* = 8.0 Hz, 1H), 6.99-6.95 (m, 2H), 5.29-5.22 (m, 1H), 3.85 (s, 3H), 2.99-2.93 (m, 1H), 1.77 (d, *J* = 8.0 Hz, 3H), 1.28-1.22 (m, 6H). <sup>13</sup>C NMR (100 MHz, CDCl<sub>3</sub>) δ 165.6, 162.7, 149.1, 144.0, 131.9, 129.6, 129.4, 127.9, 121.2, 121.1, 113.0, 57.5, 54.6, 32.9, 22.8, 20.5. IR (neat) 1722, 1594, 1496, 1354, 1303, 1260, 1177, 1160, 1130, 1106, 1087, 1024, 833, 807, 785, 739 cm<sup>-1</sup>. HRMS (ESI-TOF) Calcd for C<sub>19</sub>H<sub>21</sub>NNaO<sub>4</sub>S [M+Na]<sup>+</sup>: 382.1083, found: 382.1071. Optical rotation: [α]<sub>D</sub><sup>25</sup> = -32.9 (c = 1.0, CHCl<sub>3</sub>). HPLC: Chiralpak AD-H column (hexanes: isopropanol = 85:15, 1.0 mL/min, 254 nm); t<sub>R</sub> = 14.9 min (major), t<sub>R</sub> = 21.9 min (minor); 95:5 er.

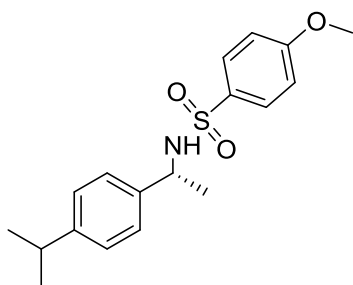

**(*R*)-*N*-(1-(4-isopropylphenyl)ethyl)-4-methoxybenzenesulfonamide (1e')**. [α]<sub>D</sub><sup>25</sup> = -5.8 (c = 0.4, CHCl<sub>3</sub>). HPLC: Chiralpak AD-H column (hexanes: isopropanol = 90:10, 1.0 mL/min, 254 nm); t<sub>R</sub> = 10.2 min (major), t<sub>R</sub> = 13.8 min (minor); 67:33 er.

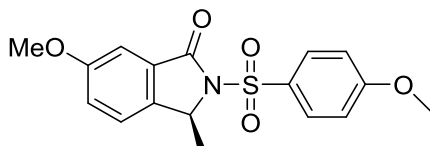

**(*S*)-6-methoxy-2-((4-methoxyphenyl)sulfonyl)-3-methylisoindolin-1-one (2f)**.

Following the general procedure, the product was isolated by column chromatography with petroleum ether/EA (10 : 1) as the eluent to give a semi-solid. <sup>1</sup>H NMR (400 MHz, CDCl<sub>3</sub>) δ 8.10-8.06 (m, 2H), 7.31 (d, *J* = 8.0 Hz, 1H), 7.19 (m, 2H), 7.00-6.96 (m, 2H), 5.24-5.19 (m, 1H), 3.85 (s, 3H), 3.80 (s, 3H), 1.75 (d, *J* = 8.0 Hz, 3H). <sup>13</sup>C NMR (100 MHz, CDCl<sub>3</sub>) δ 166.7, 164.1, 160.5, 140.1, 130.8, 130.4, 123.6, 123.1, 114.3, 106.9, 58.6, 56.0, 55.9, 21.8. IR (neat) 2918, 1722, 1495, 1358, 1323, 1307, 1280, 1260, 1159, 1082, 931, 830, 810, 801, 784, 749 cm<sup>-1</sup>. HRMS (ESI-TOF) Calcd for C<sub>17</sub>H<sub>17</sub>NNaO<sub>5</sub>S [M+Na]<sup>+</sup>: 370.0720, found: 370.0727. Optical rotation: [α]<sub>D</sub><sup>25</sup> = -6.4 (c = 0.78, CHCl<sub>3</sub>). HPLC: Chiralpak AD-H column (hexanes: isopropanol = 85:15,

1.0 mL/min, 254 nm);  $t_R = 28.5$  min (major),  $t_R = 31.6$  min (minor); 96:4 er.

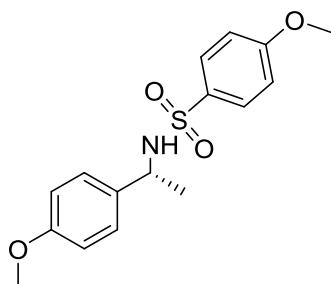

**(R)-4-methoxy-N-(1-(4-methoxyphenyl)ethyl)benzenesulfonamide (1f')**.  $[\alpha]_D^{25} = -22.2$  ( $c = 2.38$ ,  $\text{CHCl}_3$ ). HPLC: Chiralpak AD-H column (hexanes: isopropanol = 90:10, 1.0 mL/min, 254 nm);  $t_R = 30.2$  min (minor),  $t_R = 32.1$  min (major); 82:18 er.

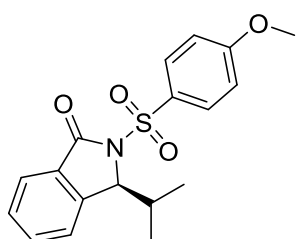

**(S)-3-isopropyl-2-((4-methoxyphenyl)sulfonyl)isoindolin-1-one (2g)**. Following the general procedure, the product was isolated by column chromatography with petroleum ether/EA (10 : 1) as the eluent to give a semi-solid.  $^1\text{H}$  NMR (400 MHz,  $\text{CDCl}_3$ )  $\delta$  8.11 (d,  $J = 8.0$  Hz, 2H), 7.81 (d,  $J = 8.0$  Hz, 1H), 7.61 (t,  $J = 8.0, 4.0$  Hz, 1H), 7.48-7.45 (m, 2H), 7.00 (d,  $J = 8.0$  Hz, 2H), 5.25 (d,  $J = 4.0$  Hz, 1H), 3.86 (s, 3H), 2.99-2.91 (m, 1H), 1.28 (d,  $J = 8.0$  Hz, 3H), 0.29 (d,  $J = 4.0$  Hz, 3H).  $^{13}\text{C}$  NMR (100 MHz,  $\text{CDCl}_3$ )  $\delta$  165.5, 162.6, 142.4, 132.1, 129.4, 127.6, 123.8, 122.6, 112.9, 66.3, 54.5, 29.9, 18.3, 13.1. IR (neat) 2919, 1719, 1593, 1365, 1355, 1293, 1261, 1185, 1168, 1153, 1085, 1068, 1017, 828, 801, 748  $\text{cm}^{-1}$ . HRMS (ESI-TOF) Calcd for  $\text{C}_{18}\text{H}_{19}\text{NNaO}_4\text{S}$   $[\text{M}+\text{Na}]^+$ : 368.0927, found: 368.0921. Optical rotation:  $[\alpha]_D^{25} = -22.3$  ( $c = 1.07$ ,  $\text{CHCl}_3$ ). HPLC: Chiralpak OD-H column (hexanes: isopropanol = 90:10, 0.5 mL/min, 254 nm);  $t_R = 33.1$  min (minor),  $t_R = 35.8$  min (major); 90:10 er.

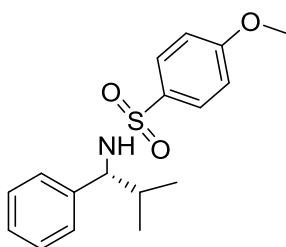

**(R)-4-methoxy-N-(2-methyl-1-phenylpropyl)benzenesulfonamide (1g')**.  $[\alpha]_{\text{D}}^{25} = -6.6$  ( $c = 1.17$ ,  $\text{CHCl}_3$ ). HPLC: Chiralpak AD-H column (hexanes: isopropanol = 90:10, 1.0 mL/min, 254 nm);  $t_{\text{R}} = 13.0$  min (major),  $t_{\text{R}} = 15.0$  min (minor); 59:41 er.

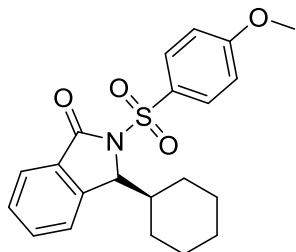

**(S)-3-cyclohexyl-2-((4-methoxyphenyl)sulfonyl)isoindolin-1-one (2h)**. Following the general procedure, the product was isolated by column chromatography with petroleum ether/EA (10 : 1) as the eluent to give a semi-solid.  $^1\text{H}$  NMR (400 MHz,  $\text{CDCl}_3$ )  $\delta$  8.12 (d,  $J = 8.0$  Hz, 2H), 7.80 (d,  $J = 8.0$  Hz, 1H), 7.61 (t,  $J = 8.0, 4.0$  Hz, 1H), 7.47 (t,  $J = 8.0, 4.0$  Hz, 2H), 7.00 (d,  $J = 8.0$  Hz, 2H), 5.22 (d,  $J = 4.0$  Hz, 1H), 3.86 (s, 3H), 2.57-2.51 (m, 1H), 2.03 (d,  $J = 12.0$  Hz, 1H), 1.86 (d,  $J = 12.0$  Hz, 1H), 1.63 (s, 1H), 1.48-1.32 (m, 3H), 1.25 (s, 1H), 1.02-0.97 (m, 3H).  $^{13}\text{C}$  NMR (100 MHz,  $\text{CDCl}_3$ )  $\delta$  166.9, 164.1, 144.4, 133.5, 130.9, 130.8, 130.7, 128.9, 125.1, 124.1, 114.3, 67.4, 55.9, 41.6, 30.3, 26.9, 26.5, 25.8, 25.4. IR (neat) 2920, 1721, 1362, 1287, 1259, 1184, 1164, 1085, 1044, 1021, 869, 830, 816, 798, 775, 748  $\text{cm}^{-1}$ . HRMS (ESI-TOF) Calcd for  $\text{C}_{21}\text{H}_{23}\text{NNaO}_4\text{S}$   $[\text{M}+\text{Na}]^+$ : 408.1240, found: 408.1230. Optical rotation:  $[\alpha]_{\text{D}}^{25} = -18.6$  ( $c = 0.81$ ,  $\text{CHCl}_3$ ). HPLC: Chiralpak AD-H column (hexanes: isopropanol = 90:10, 0.5 mL/min, 254 nm);  $t_{\text{R}} = 28.9$  min (major),  $t_{\text{R}} = 30.5$  min (minor); 89:11 er.

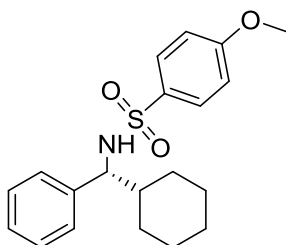

**(R)-N-(cyclohexyl (phenyl)methyl)-4-methoxybenzenesulfonamid (1h')**.  $[\alpha]_{\text{D}}^{25} = -10.2$  ( $c = 2.48$ ,  $\text{CHCl}_3$ ). HPLC: Chiralpak AD-H column (hexanes: isopropanol = 90:10, 1.0 mL/min, 254 nm);  $t_{\text{R}} = 14.2$  min (major),  $t_{\text{R}} = 17.4$  min (minor); 87:13 er.

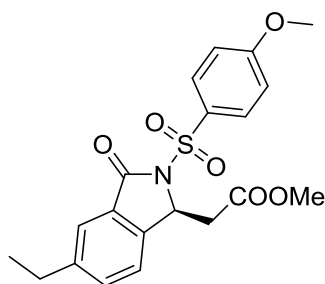

**(S)-methyl-2-(5-ethyl-2-((4-methoxyphenyl)sulfonyl)-3-oxoisindolin-1-yl)acetate**

**(2i).** Following the general procedure, the product was isolated by column chromatography with petroleum ether/EA (10 : 1) as the eluent to give a semi-solid. <sup>1</sup>H NMR (400 MHz, CDCl<sub>3</sub>) δ 8.02 (d, *J* = 12.0 Hz, 2H), 7.54 (d, *J* = 8.0 Hz, 1H), 7.38 (d, *J* = 8.0 Hz, 1H), 7.31 (d, *J* = 8.0 Hz, 1H), 6.92 (d, *J* = 8.0 Hz, 2H), 5.49 (q, *J* = 4.0 Hz, 1H), 3.78 (s, 3H), 3.61 (s, 3H), 3.52-3.47 (m, 1H), 2.82 (q, *J* = 8.0 Hz, 1H), 2.64-2.59 (m, 2H), 1.16 (t, *J* = 8.0 Hz, 3H). <sup>13</sup>C NMR (100 MHz, CDCl<sub>3</sub>) δ 168.7, 164.9, 162.1, 144.4, 141.1, 132.5, 128.9, 128.4, 127.6, 121.8, 121.0, 112.6, 56.7, 54.0, 52.6, 50.1, 37.3, 27.0, 13.6. IR (neat) 2959, 2920, 2850, 1728, 1496, 1357, 1291, 1259, 1155, 1131, 1086, 1019, 915, 900, 832, 799, 716 cm<sup>-1</sup>. HRMS (ESI-TOF) Calcd for C<sub>20</sub>H<sub>21</sub>NNaO<sub>6</sub>S [M+Na]<sup>+</sup>:426.0982, found: 426.0969. Optical rotation: [α]<sub>D</sub><sup>25</sup> = -43.1 (c = 2.11, CHCl<sub>3</sub>). HPLC: Chiralpak AD-H column (hexanes: isopropanol = 85:15, 1.0 mL/min, 254 nm); t<sub>R</sub> = 39.2 min (minor), t<sub>R</sub> = 48.7 min (major); 91:9 er.

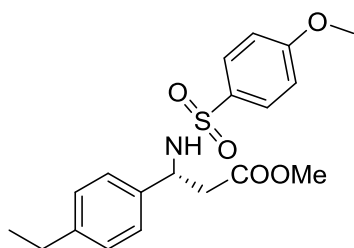

**(R)-Methyl 3-(4-ethylphenyl)-3-((4-methoxyphenyl)sulfonamide)propanoate (1i')**

[α]<sub>D</sub><sup>25</sup> = -27.3 (c = 1.77, CHCl<sub>3</sub>). HPLC: Chiralpak OD-H column (hexanes: isopropanol = 90:10, 0.5 mL/min, 254 nm); t<sub>R</sub> = 48.3 min (minor), t<sub>R</sub> = 51.6 min (major); 80:20 er.

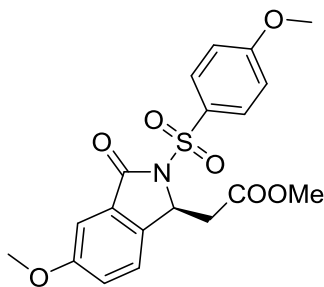

**(S)-methyl-2-(5-methoxy-2-((4-methoxyphenyl)sulfonyl)-3-oxoisindolin-1-yl)acetate (2j).** Following the general procedure, the product was isolated by column chromatography with petroleum ether/EA (10 : 1) as the eluent to give a semi-solid.  $^1\text{H}$  NMR (400 MHz,  $\text{CDCl}_3$ )  $\delta$  8.02 (d,  $J = 12.0$  Hz, 2H), 7.30 (d,  $J = 8.0$  Hz, 1H), 7.14-7.07 (m, 2H), 6.92 (d,  $J = 8.0$  Hz, 2H), 5.46 (dd,  $J = 8.0, 4.0$  Hz, 1H), 3.78 (s, 3H), 3.73 (s, 3H), 3.60 (s, 3H), 3.51 (dd,  $J = 16.0, 4.0$  Hz, 1H), 2.82 (q,  $J = 8.0$  Hz, 1H).  $^{13}\text{C}$  NMR (100 MHz,  $\text{CDCl}_3$ )  $\delta$  170.3, 167.0, 163.9, 160.8, 138.1, 130.6, 124.2, 122.7, 114.2, 107.2, 58.5, 55.9, 51.8, 39.1. IR (neat) 1726, 1593, 1495, 1357, 1322, 1281, 1260, 1183, 1157, 1109, 1080, 1020, 832, 811, 766, 717  $\text{cm}^{-1}$ . HRMS (ESI-TOF) Calcd for  $\text{C}_{19}\text{H}_{19}\text{NNaO}_7\text{S}$   $[\text{M}+\text{Na}]^+$ :428.0774, found: 428.0764. Optical rotation:  $[\alpha]_{\text{D}}^{25} = -31.6$  ( $c = 1.3$ ,  $\text{CHCl}_3$ ). HPLC: Chiralpak AD-H column (hexanes: isopropanol = 85:15, 0.5 mL/min, 254 nm);  $t_{\text{R}} = 102.0$  min (minor),  $t_{\text{R}} = 106.9$  min (major); 96:4 er.

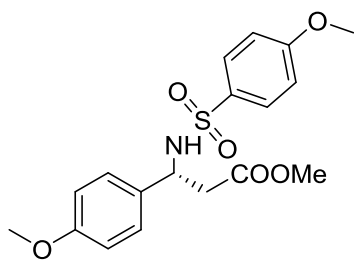

**(R)-Methyl 3-(4-methoxyphenyl)-3-((4-methoxyphenyl)sulfonamide)propanoate (1j').**  $[\alpha]_{\text{D}}^{25} = -23.2$  ( $c = 1.80$ ,  $\text{CHCl}_3$ ). HPLC: Chiralpak AD-H column (hexanes: isopropanol = 90:10, 1.0 mL/min, 254 nm);  $t_{\text{R}} = 63.2$  min (major),  $t_{\text{R}} = 69.0$  min (minor); 72:28 er.

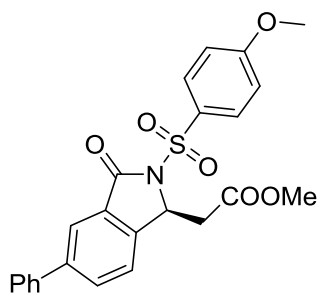

**(S)-methyl-2-(2-((4-methoxyphenyl)sulfonyl)-3-oxo-5-phenylisoindolin-1-yl)acetate (2k).** Following the general procedure, the product was isolated by column chromatography with petroleum ether/EA (10 : 1) as the eluent to give a semi-solid.  $^1\text{H}$  NMR (400 MHz,  $\text{CDCl}_3$ )  $\delta$  8.12 (d,  $J = 12.0$  Hz, 2H), 7.97 (s, 1H), 7.85-7.82 (m,  $J = 4.0$  Hz, 1H), 7.56-7.54 (m, 3H), 7.46 (t,  $J = 4.0, 8.0$  Hz, 2H), 7.40 (t,  $J = 8.0$  Hz, 1H), 7.01 (d,  $J = 8.0$  Hz, 2H), 5.64 (dd,  $J = 8.0, 1$  Hz), 3.86 (s, 3H), 3.70 (s, 3H), 3.65 (dd,  $J = 16.0, 4.0$  Hz, 1H), 2.97 (q,  $J = 8.0$  Hz, 1H).  $^{13}\text{C}$  NMR (100 MHz,  $\text{CDCl}_3$ )  $\delta$  170.5, 166.5, 164.2, 144.1, 142.8, 139.4, 133.4, 130.8, 129.2, 128.3, 127.3, 123.6, 123.2, 114.3, 58.4, 55.8, 52.2, 39.4. IR (neat) 1722, 1356, 1302, 1261, 1198, 1180, 1157, 1137, 1088, 1019, 981, 833, 806, 759, 718  $\text{cm}^{-1}$ . HRMS (ESI-TOF) Calcd for  $\text{C}_{24}\text{H}_{21}\text{NNaO}_6\text{S}$   $[\text{M}+\text{Na}]^+$ : 474.0982, found: 474.0971. Optical rotation:  $[\alpha]_{\text{D}}^{25} = -23.9$  ( $c = 2.84$ ,  $\text{CHCl}_3$ ). HPLC: Chiralpak AD-H column (hexanes: isopropanol = 85:15, 1.0 mL/min, 254 nm);  $t_{\text{R}} = 65.5$  min (minor),  $t_{\text{R}} = 85.8$  min (major); 89:11 er.

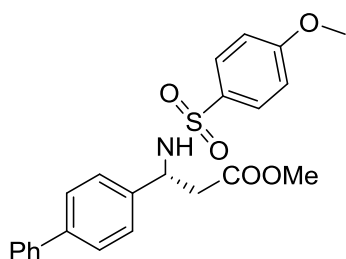

**(R)-Methyl-3-([1,1'-biphenyl]-4-yl)-3-((4-methoxyphenyl)sulfonamide)propanoate (1k').**  $[\alpha]_{\text{D}}^{25} = -13.4$  ( $c = 1.0$ ,  $\text{CHCl}_3$ ). HPLC: Chiralpak AD-H column (hexanes: isopropanol = 90:10, 1.0 mL/min, 254 nm);  $t_{\text{R}} = 61.5$  min (major),  $t_{\text{R}} = 67.2$  min (minor); 99:1 er.

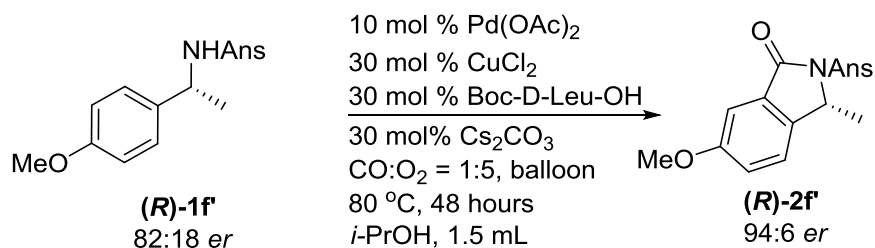

**(R)-6-methoxy-2-((4-methoxyphenyl)sulfonyl)-3-methylisoindolin-1-one (2f')**. To a 25 mL reaction tube, **(R)-1f'** (33 mg, 0.1 mmol, 1.0 equiv.), Pd(OAc)<sub>2</sub> (10 mol%), Boc-D-Leu-OH (30 mol%), CuCl<sub>2</sub> (30 mol%) and Cs<sub>2</sub>CO<sub>3</sub> (30 mol%) were added. Evacuated the reaction tube and refilled it with the CO/O<sub>2</sub> gas mixture through the balloon and then *i*-PrOH (1.5 mL) was added. The resulting solution was heated to 80 °C for 48 hours. After the reaction finished, cool down the mixture to room temperature and release the CO/O<sub>2</sub> gas mixture carefully in the fume hood. The reaction mixture was passed through a short column of silica gel and eluted with EtOAc (50 ml), the eluent was concentrated under vacuum. The resulting residue was purified by column chromatography to give the desired product **(R)-2f'** (21 mg, 60% yield).  $[\alpha]_D^{25} = 23.0$  (*c* = 0.4, CHCl<sub>3</sub>). HPLC: Chiralpak AD-H column (hexanes: isopropanol = 85:15, 1.0 mL/min, 254 nm); *t*<sub>R</sub> = 28.8 min (minor), *t*<sub>R</sub> = 31.9 min (major); 94:6 *er*.

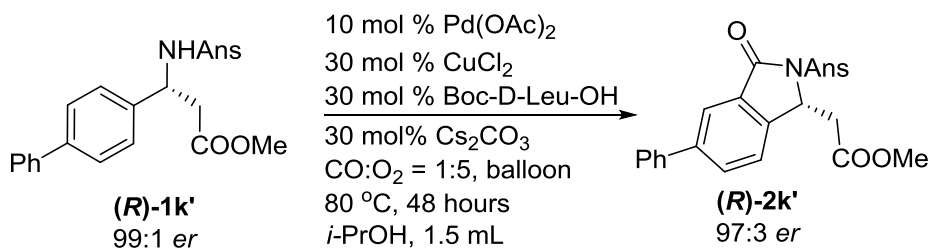

**(R)-methyl-2-(2-((4-methoxyphenyl)sulfonyl)-3-oxo-5-phenylisoindolin-1-yl)acetate (2k')**. To a 25 mL reaction tube, **(R)-1k'** (43 mg, 0.1 mmol, 1.0 equiv.), Pd(OAc)<sub>2</sub> (10 mol%), Boc-D-Leu-OH (30 mol%), CuCl<sub>2</sub> (30 mol%) and Cs<sub>2</sub>CO<sub>3</sub> (30 mol%) were added. Evacuated the reaction tube and refilled it with the CO/O<sub>2</sub> gas mixture through the balloon and then *i*-PrOH (1.5 mL) was added. The resulting solution was heated to 80 °C for 48 hours. After the reaction finished, cool down the mixture to room temperature and release the CO/O<sub>2</sub> gas mixture carefully in the fume hood. The



reaction mixture was passed through a short column of silica gel and eluted with EtOAc (50 ml), the eluent was concentrated under vacuum. The resulting residue was purified by column chromatography to give the desired product **(R)-2k'** (30 mg, 66.4% yield).  $[\alpha]_D^{25} = 17.3$  ( $c = 1.5$ ,  $\text{CHCl}_3$ ). HPLC: Chiralpak AD-H column (hexanes: isopropanol = 85:15, 1.0 mL/min, 254 nm);  $t_R = 64.1$  min (major),  $t_R = 83.8$  min (minor); 97:3 er.

### 3. Computational studies

All calculations were performed with the Gaussian 09 suites of programs.<sup>12</sup> Geometry optimization for all stationary points along the reaction paths without any symmetry constraints was conducted with the M06L functional.<sup>13</sup> The standard 6-31G(d,p) basis was employed for the C, H, O, N and S atoms, whereas the SDD valence basis set<sup>14</sup> in combination with the corresponding effective core potential were used for the Pd and Cs atoms. Frequency calculations were performed for each optimized structure at the same level of theory to characterize the stationary points as minima or saddle points. The connectivity of the stationary points was verified by IRC<sup>16</sup> runs or the vibrational mode of the imaginary frequencies. The zero-point correction, thermal corrections, and entropic corrections were determined from the frequency calculations. The reported enthalpies and Gibbs free energies (in kcal/mol at 298.15 K and 1 atm) were obtained from the single-point energy calculations on the optimized geometries at the M06L/Def2TZVP<sup>17</sup> level of theory combined with the above mentioned corrections.

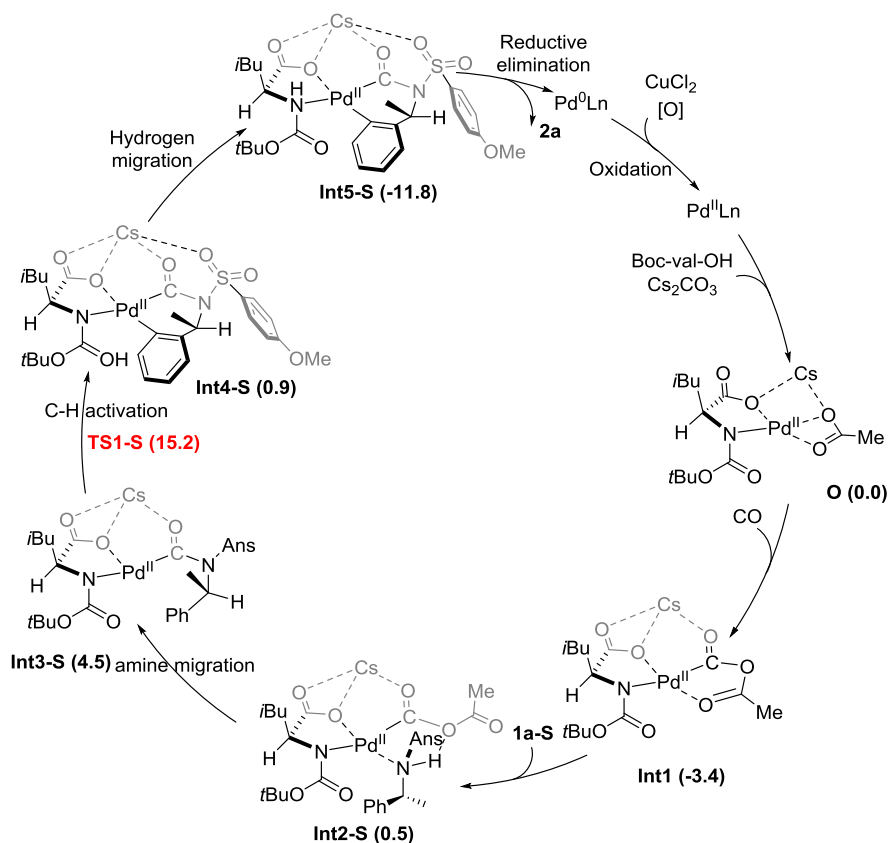

**Figure S1. Propose catalytic cycle for the kinetic resolution of benzylamine**

**Table S7**

| Systems | $\Delta E^d$ | $\Delta H^d$ | $\Delta S^e$ | $\Delta G^d$ |
|---------|--------------|--------------|--------------|--------------|
| O       | 0.0          | 0.0          | 0.0          | 0.0          |
| Int1    | -14.6        | -15.2        | -39.3        | -3.4         |
| Int2-R  | -25.6        | -26.8        | -101.6       | 3.5          |
| Int2-S  | -27.2        | -28.4        | -97.1        | 0.5          |
| Int3-R  | -12.2        | -12.8        | -59.4        | 4.9          |
| Int3-S  | -9.9         | -10.4        | -50.1        | 4.5          |
| Int4-R  | -13.6        | -14.2        | -55.2        | 2.2          |
| Int4-S  | -13.3        | -13.9        | -49.7        | 0.9          |
| Int5-R  | -24.1        | -24.7        | -60.7        | -6.6         |
| Int5-S  | -26.3        | -26.9        | -50.4        | -11.8        |
| TS1-R   | -1.3         | -1.9         | -58.8        | 15.7         |
| TS1-S   | 0.9          | 0.3          | -49.9        | 15.2         |
| TS2-R   | 5.6          | 5.0          | -58.1        | 22.3         |
| TS2-S   | 3.1          | 2.5          | -53.1        | 18.4         |

[a] Basis set (BS) refers to the standard 6-31G(d,p) basis for C, H, O, N atoms and LANL2DZ valence basis set in combination with the corresponding effective core potential for Pd. [b] Relative activation energy and reaction parameters were calculated based on those of free O. [c] Parameters for all the transition state (TSs) should read as those with double dagger like  $\Delta E^\ddagger$ ,  $\Delta H^\ddagger$ ,  $\Delta S^\ddagger$ , and  $\Delta G^\ddagger$ . [d] In kcal/mol. [e] In kcal/(mol K).

## B3-LYP geometries for all the optimized

### compounds and transition states.

#### CO

|   |            |            |             |
|---|------------|------------|-------------|
| O | 0.00000000 | 0.00000000 | 0.48912700  |
| C | 0.00000000 | 0.00000000 | -0.65216900 |

#### HAc

|   |             |             |             |
|---|-------------|-------------|-------------|
| C | -0.13417400 | -0.13659200 | 0.00001300  |
| C | 1.36567100  | 0.01235700  | -0.00004000 |
| H | 1.70310400  | 0.56786000  | -0.88075100 |
| H | 1.70309200  | 0.56439500  | 0.88285700  |
| H | 1.83338700  | -0.97037000 | -0.00192400 |
| O | -0.82717100 | 1.03521500  | -0.00007100 |
| O | -0.72477500 | -1.18464400 | 0.00001600  |
| H | -0.21299300 | 1.77895100  | 0.00042400  |

#### a-R

|   |             |             |             |
|---|-------------|-------------|-------------|
| C | -1.32515600 | -0.47405300 | -0.21936200 |
| S | 0.04720700  | 1.86076700  | 0.05000300  |
| N | -1.07900800 | 0.89343900  | -0.71506300 |
| H | -1.02505900 | 0.98827100  | -1.72333600 |
| O | -0.37445200 | 1.94511200  | 1.44328900  |
| O | 0.19292300  | 3.02216400  | -0.81735400 |
| C | 1.57895600  | 0.96081100  | 0.03455900  |
| C | 2.38533300  | 0.98700600  | -1.10822300 |
| C | 1.92004100  | 0.16024100  | 1.12025500  |
| C | 3.52507900  | 0.20684700  | -1.16075800 |
| H | 2.11584500  | 1.63280100  | -1.93909900 |
| C | 3.06440800  | -0.63028200 | 1.07208600  |
| H | 1.29379300  | 0.17373000  | 2.00747900  |
| C | 3.86714600  | -0.61141800 | -0.07341800 |
| H | 4.17629700  | 0.21304500  | -2.02858600 |
| H | 3.32632200  | -1.24513200 | 1.92587600  |
| C | -2.82013800 | -0.68766100 | -0.06329100 |
| C | -3.48422000 | -1.79416500 | -0.59151700 |
| C | -3.55258600 | 0.25633100  | 0.66488000  |
| C | -4.85565600 | -1.95686000 | -0.39702300 |
| H | -2.93792500 | -2.54014800 | -1.16259300 |
| C | -4.91688200 | 0.09273200  | 0.86311000  |
| H | -3.03113400 | 1.12319700  | 1.06503500  |
| C | -5.57443500 | -1.01633300 | 0.33084800  |
| H | -5.35973400 | -2.82202400 | -0.81952600 |
| H | -5.47164600 | 0.83300700  | 1.43317200  |
| H | -6.64274700 | -1.14330800 | 0.48279700  |

|            |             |             |             |
|------------|-------------|-------------|-------------|
| O          | 4.99882300  | -1.34007600 | -0.22720000 |
| C          | 5.38252500  | -2.17926000 | 0.84579200  |
| H          | 4.61877500  | -2.93792000 | 1.05711700  |
| H          | 6.30116700  | -2.67191300 | 0.52911900  |
| H          | 5.57570700  | -1.60350100 | 1.75924500  |
| H          | -0.89118300 | -0.49381200 | 0.79119800  |
| C          | -0.61203100 | -1.51426600 | -1.06800800 |
| H          | -1.00817200 | -1.53029800 | -2.08975300 |
| H          | 0.45889900  | -1.29980300 | -1.11973300 |
| H          | -0.73412700 | -2.51814100 | -0.65246900 |
| <b>a-S</b> |             |             |             |
| C          | -1.44726900 | 0.18449000  | 0.73590000  |
| S          | 0.21770400  | 2.15406000  | -0.21026300 |
| N          | -1.22444700 | 1.28178000  | -0.23310800 |
| H          | -1.38136900 | 0.97834100  | -1.19039600 |
| O          | 0.29931400  | 2.83105800  | 1.07648000  |
| O          | 0.22427400  | 2.86855000  | -1.48014300 |
| C          | 1.52385000  | 0.94922600  | -0.25148500 |
| C          | 1.98897100  | 0.47334500  | -1.48130300 |
| C          | 2.04220700  | 0.44852800  | 0.93922300  |
| C          | 2.97233200  | -0.49749800 | -1.51287600 |
| H          | 1.59029200  | 0.88989800  | -2.40159900 |
| C          | 3.02930900  | -0.53206200 | 0.91430100  |
| H          | 1.68631200  | 0.84659400  | 1.88525000  |
| C          | 3.49479000  | -1.00866400 | -0.31564500 |
| H          | 3.36379700  | -0.87640800 | -2.45112000 |
| H          | 3.43110300  | -0.90807000 | 1.84826800  |
| C          | -2.62054500 | -0.62795600 | 0.24201600  |
| C          | -2.53152200 | -2.01680700 | 0.14389600  |
| C          | -3.82355400 | 0.00064800  | -0.09549100 |
| C          | -3.62494600 | -2.76960300 | -0.27660000 |
| H          | -1.59502500 | -2.50947500 | 0.39964300  |
| C          | -4.91442400 | -0.74953100 | -0.52103300 |
| H          | -3.89196000 | 1.08397400  | -0.02706700 |
| C          | -4.81848700 | -2.13693400 | -0.61074200 |
| H          | -3.54147400 | -3.85038300 | -0.34889400 |
| H          | -5.84326300 | -0.25010900 | -0.78306100 |
| H          | -5.67163700 | -2.72199400 | -0.94218000 |
| H          | -0.56516800 | -0.48012200 | 0.76950000  |
| C          | -1.70080900 | 0.73537500  | 2.13294600  |
| H          | -0.84470300 | 1.29792100  | 2.50941400  |
| H          | -2.56269900 | 1.40822900  | 2.12162300  |
| H          | -1.91521300 | -0.08892900 | 2.81872300  |
| O          | 4.45071700  | -1.95801300 | -0.45704300 |

|    |             |             |             |
|----|-------------|-------------|-------------|
| C  | 5.01528700  | -2.49435300 | 0.72475500  |
| H  | 4.25826200  | -2.99094900 | 1.34458800  |
| H  | 5.75218500  | -3.22787000 | 0.40008800  |
| H  | 5.51283200  | -1.72007300 | 1.32165800  |
| O  |             |             |             |
| C  | -1.38070700 | 1.15402000  | -0.11461800 |
| H  | -2.00838000 | 1.25908100  | -1.01163600 |
| C  | -0.07110900 | 1.85922700  | -0.43081500 |
| O  | 0.01247000  | 3.05333700  | -0.68724700 |
| C  | -2.10470400 | 1.82272400  | 1.06597000  |
| H  | -1.38881100 | 1.93143000  | 1.89327000  |
| C  | -2.03961500 | -1.20685800 | -0.16269100 |
| C  | -4.42496100 | -1.49275200 | -0.62776500 |
| C  | -4.25674000 | -2.32632600 | -1.88974100 |
| H  | -5.18530500 | -2.86688300 | -2.10318900 |
| H  | -4.03999500 | -1.67865800 | -2.74493800 |
| H  | -3.44563400 | -3.04529400 | -1.77786800 |
| C  | -5.55260400 | -0.48717400 | -0.80066700 |
| H  | -5.66061400 | 0.12997500  | 0.09632200  |
| H  | -5.35515300 | 0.17653600  | -1.64759900 |
| H  | -6.49958600 | -1.00538700 | -0.97994700 |
| C  | -4.66942300 | -2.35536100 | 0.60190400  |
| H  | -3.87146000 | -3.08544600 | 0.73569100  |
| H  | -4.72650900 | -1.72786600 | 1.49713000  |
| H  | -5.62320100 | -2.88366100 | 0.49878700  |
| O  | 1.01026500  | 1.10042700  | -0.42011900 |
| O  | -3.26186400 | -0.63504300 | -0.42542700 |
| O  | -1.82464700 | -2.41264900 | -0.18226700 |
| N  | -1.12572800 | -0.25667700 | 0.15262600  |
| Pd | 0.78912600  | -0.80373400 | 0.20224900  |
| Cs | 3.83551500  | 1.11703100  | -0.48362500 |
| C  | 2.32296400  | -2.69515700 | 0.81262700  |
| O  | 2.81269200  | -1.57467200 | 0.40370200  |
| O  | 1.07460900  | -2.82969600 | 0.90678400  |
| C  | 3.24595500  | -3.82036200 | 1.15513600  |
| H  | 3.76803400  | -4.15834000 | 0.25561600  |
| H  | 4.00761400  | -3.48535700 | 1.86378300  |
| H  | 2.69187700  | -4.65725000 | 1.57889500  |
| H  | -2.87054300 | 1.11628000  | 1.41321400  |
| C  | -2.76075900 | 3.17038400  | 0.76218100  |
| H  | -2.01555700 | 3.80101400  | 0.26173000  |
| C  | -3.96327900 | 3.01355000  | -0.16069100 |
| H  | -4.39472300 | 3.98660600  | -0.41851000 |
| H  | -3.71080100 | 2.50678600  | -1.09747700 |

|             |             |             |             |
|-------------|-------------|-------------|-------------|
| H           | -4.75010100 | 2.42220400  | 0.32437500  |
| C           | -3.17904200 | 3.84958500  | 2.05973900  |
| H           | -3.89838300 | 3.23025600  | 2.61094400  |
| H           | -2.32245700 | 4.02224700  | 2.71989800  |
| H           | -3.65740400 | 4.81687600  | 1.87217000  |
| <b>Int1</b> |             |             |             |
| C           | 1.07359500  | -1.32193300 | -0.31919200 |
| H           | 1.65265900  | -1.85661900 | -1.08423000 |
| C           | -0.39668400 | -1.50960300 | -0.64645200 |
| O           | -0.89867800 | -2.57486500 | -1.01732500 |
| C           | 1.40227300  | -1.96283100 | 1.04696200  |
| H           | 0.90782100  | -1.36491900 | 1.82724800  |
| C           | 2.64271000  | 0.54615300  | -0.41936200 |
| C           | 4.95837000  | -0.22971600 | -0.65128900 |
| C           | 5.30291500  | 0.63691300  | -1.85476200 |
| H           | 6.39038100  | 0.73417000  | -1.94527500 |
| H           | 4.92771600  | 0.17511800  | -2.77348200 |
| H           | 4.86063100  | 1.62794900  | -1.75311600 |
| C           | 5.55422100  | -1.62089200 | -0.80850500 |
| H           | 5.28840900  | -2.25336100 | 0.04430200  |
| H           | 5.18198700  | -2.10070400 | -1.71827100 |
| H           | 6.64554100  | -1.56469100 | -0.86840600 |
| C           | 5.42786200  | 0.39852900  | 0.65408500  |
| H           | 5.01448400  | 1.39918300  | 0.77617200  |
| H           | 5.11564100  | -0.21791800 | 1.50382700  |
| H           | 6.52146500  | 0.45958300  | 0.66592600  |
| C           | -0.52269100 | 3.98412800  | 0.75027200  |
| C           | -0.25748200 | 5.40338000  | 1.11836900  |
| H           | 0.81438900  | 5.58616000  | 1.16034500  |
| H           | -0.72128700 | 6.06821100  | 0.38608400  |
| H           | -0.71431200 | 5.62781900  | 2.08499600  |
| O           | -1.16866200 | -0.46348800 | -0.45563100 |
| O           | 3.53075900  | -0.49847800 | -0.60307000 |
| O           | 2.99199700  | 1.72136800  | -0.37484400 |
| N           | 1.37387700  | 0.10188400  | -0.31782000 |
| Pd          | -0.29113800 | 1.27824900  | 0.02125700  |
| C           | -2.00621700 | 2.16205600  | 0.28268300  |
| O           | -3.16880500 | 1.87112400  | 0.23198400  |
| O           | 0.41233500  | 3.19115100  | 0.54222200  |
| O           | -1.79131900 | 3.65957200  | 0.66858400  |
| Cs          | -3.87074600 | -1.24362500 | -0.52135100 |
| H           | 2.47845100  | -1.81130800 | 1.18627700  |
| C           | 1.04714800  | -3.45015000 | 1.20930200  |
| H           | 0.93635100  | -3.88576100 | 0.20671200  |

|               |             |             |             |
|---------------|-------------|-------------|-------------|
| C             | -0.27812100 | -3.63536800 | 1.94168100  |
| H             | -1.08945400 | -3.09131800 | 1.44831500  |
| H             | -0.56835600 | -4.69082200 | 1.98998600  |
| H             | -0.20189100 | -3.26573400 | 2.97238800  |
| C             | 2.15610800  | -4.19671900 | 1.94056400  |
| H             | 1.91440200  | -5.25723500 | 2.07331300  |
| H             | 3.10515900  | -4.13506900 | 1.39847800  |
| H             | 2.32100600  | -3.77075400 | 2.93815200  |
| <b>Int2-R</b> |             |             |             |
| C             | 3.09174500  | 1.31388300  | 0.46641900  |
| H             | 3.81509200  | 2.10118100  | 0.22188000  |
| C             | 3.75142400  | -0.00864400 | 0.08850200  |
| O             | 4.84168400  | -0.35160900 | 0.56071400  |
| C             | 2.81391500  | 1.33616900  | 1.97522400  |
| H             | 2.05919000  | 0.56095500  | 2.18040000  |
| C             | 1.59920200  | 2.57145200  | -1.00011600 |
| C             | 2.29673800  | 4.89677500  | -1.36928300 |
| C             | 2.36176100  | 4.81752300  | -2.88841000 |
| H             | 2.33634800  | 5.82679500  | -3.31388400 |
| H             | 3.29723800  | 4.34383800  | -3.20196700 |
| H             | 1.52661700  | 4.24172900  | -3.28605700 |
| C             | 3.47295800  | 5.70154700  | -0.83501000 |
| H             | 3.42832200  | 5.78170500  | 0.25497100  |
| H             | 4.42035300  | 5.22490400  | -1.10418600 |
| H             | 3.46327800  | 6.71210700  | -1.25522200 |
| C             | 0.98637400  | 5.50022200  | -0.88131900 |
| H             | 0.13132600  | 4.96620800  | -1.29527100 |
| H             | 0.93745000  | 5.45572700  | 0.21265000  |
| H             | 0.92590800  | 6.55259900  | -1.17867400 |
| O             | 3.09555800  | -0.79609600 | -0.73181600 |
| O             | 2.50437800  | 3.58748000  | -0.77052100 |
| O             | 0.64338100  | 2.71007200  | -1.77463900 |
| N             | 1.85680800  | 1.47339400  | -0.27960900 |
| C             | 0.68828200  | -2.33015500 | -1.12466300 |
| O             | 1.35034200  | -3.33090100 | -0.95145100 |
| Pd            | 1.07436700  | -0.43676800 | -0.67513400 |
| C             | -1.65539600 | 1.21566700  | -0.60724200 |
| S             | -1.41681000 | -0.91730200 | 1.24146400  |
| N             | -1.07206800 | -0.15350100 | -0.31929900 |
| H             | -1.44262300 | -0.82172900 | -1.00542600 |
| O             | -0.68979600 | -0.18156300 | 2.26375600  |
| O             | -1.15965000 | -2.33618700 | 0.99945800  |
| C             | -3.14738500 | -0.68943600 | 1.47280500  |
| C             | -4.02894900 | -1.34928300 | 0.61728500  |

|    |             |             |             |
|----|-------------|-------------|-------------|
| C  | -3.61082700 | 0.19282800  | 2.45046300  |
| C  | -5.38877300 | -1.10220000 | 0.71635400  |
| H  | -3.65721000 | -2.03155200 | -0.14460500 |
| C  | -4.96876300 | 0.43286800  | 2.55493300  |
| H  | -2.90178800 | 0.68339800  | 3.11066100  |
| C  | -5.85926700 | -0.19047600 | 1.67016600  |
| H  | -6.06536300 | -1.58864800 | 0.02333700  |
| H  | -5.36701100 | 1.11798900  | 3.29579000  |
| O  | -0.58583500 | -2.42875500 | -1.81796300 |
| O  | -2.63901400 | -3.21180600 | -1.97035200 |
| C  | -1.48683300 | -3.45941600 | -1.69106400 |
| C  | -1.00403400 | -4.78989800 | -1.21739000 |
| H  | -0.18835000 | -5.15882500 | -1.84043100 |
| H  | -0.60655500 | -4.69545500 | -0.20469700 |
| H  | -1.84361400 | -5.48424400 | -1.22772300 |
| C  | -3.09021300 | 1.12065700  | -1.08649100 |
| C  | -4.11769300 | 1.88641600  | -0.53164400 |
| C  | -3.39982700 | 0.27289000  | -2.15943700 |
| C  | -5.41746100 | 1.80383900  | -1.02760800 |
| H  | -3.90738500 | 2.55180900  | 0.30114700  |
| C  | -4.69733300 | 0.17704200  | -2.64698300 |
| H  | -2.61945900 | -0.32971900 | -2.62292100 |
| C  | -5.71346300 | 0.94670700  | -2.08302400 |
| H  | -6.20261600 | 2.40542000  | -0.57434400 |
| H  | -4.91101100 | -0.49394400 | -3.47436900 |
| H  | -6.72720800 | 0.88481800  | -2.47199300 |
| Cs | 4.13310900  | -3.28951200 | 0.35068600  |
| H  | 3.72832200  | 1.05708300  | 2.51789000  |
| C  | 2.29668500  | 2.68375300  | 2.47767100  |
| H  | 1.53173000  | 3.02455200  | 1.76329400  |
| C  | 1.63833400  | 2.53345700  | 3.84213800  |
| H  | 2.35259300  | 2.14974500  | 4.58202600  |
| H  | 1.26636600  | 3.49297700  | 4.21774200  |
| H  | 0.79571000  | 1.83511700  | 3.80226000  |
| C  | 3.40271400  | 3.72939900  | 2.51256400  |
| H  | 3.01341400  | 4.71112500  | 2.80637200  |
| H  | 4.17939700  | 3.45315200  | 3.23724600  |
| H  | 3.87837400  | 3.84495000  | 1.53423900  |
| H  | -1.02661500 | 1.54954000  | -1.44373000 |
| C  | -1.38636500 | 2.19345100  | 0.51552600  |
| H  | -0.33819600 | 2.12659900  | 0.81546500  |
| H  | -1.57245100 | 3.20570500  | 0.14894100  |
| H  | -2.01453900 | 2.02776900  | 1.39547100  |
| O  | -7.15862100 | 0.16040800  | 1.80522800  |



|               |             |             |             |
|---------------|-------------|-------------|-------------|
| C             | -8.07663200 | -0.38353700 | 0.87348700  |
| H             | -9.04548700 | 0.05161100  | 1.11611000  |
| H             | -7.80144900 | -0.11893600 | -0.15540500 |
| H             | -8.13910000 | -1.47531200 | 0.95796100  |
| <b>Int2-S</b> |             |             |             |
| C             | 3.11992500  | 1.14782200  | 0.44435100  |
| H             | 3.86196900  | 1.94091400  | 0.29393000  |
| C             | 3.74897100  | -0.16875700 | 0.00571000  |
| O             | 4.87047500  | -0.52556700 | 0.38505900  |
| C             | 2.79680800  | 1.02562400  | 1.94469900  |
| H             | 2.06683200  | 0.20924100  | 2.05707700  |
| C             | 1.64165500  | 2.56397800  | -0.90743500 |
| C             | 2.20940200  | 4.94479300  | -0.88593400 |
| C             | 2.28375800  | 5.12677600  | -2.39645600 |
| H             | 2.21879100  | 6.19245900  | -2.64291500 |
| H             | 3.24087500  | 4.75336800  | -2.77401000 |
| H             | 1.47804700  | 4.59382000  | -2.89860000 |
| C             | 3.33185200  | 5.72475500  | -0.21669500 |
| H             | 3.28534700  | 5.62467900  | 0.87101900  |
| H             | 4.30740800  | 5.36060100  | -0.55282200 |
| H             | 3.25571000  | 6.78716100  | -0.46816400 |
| C             | 0.86199900  | 5.36914300  | -0.31743700 |
| H             | 0.04725500  | 4.82244000  | -0.79333100 |
| H             | 0.83000700  | 5.17488000  | 0.76001300  |
| H             | 0.71135800  | 6.44279900  | -0.47427800 |
| O             | 3.00900700  | -0.96507900 | -0.73150400 |
| O             | 2.49846500  | 3.56743200  | -0.50708500 |
| O             | 0.72028300  | 2.76681700  | -1.70484700 |
| N             | 1.92170300  | 1.38347400  | -0.34163700 |
| C             | 0.50095900  | -2.37230000 | -0.87236600 |
| O             | 1.18792000  | -3.36732300 | -0.75346100 |
| Pd            | 1.02504500  | -0.44974400 | -0.72630400 |
| C             | -1.65019700 | 1.04571700  | -1.59244000 |
| S             | -1.32171400 | 0.63052600  | 1.14244600  |
| N             | -1.07301700 | 0.13869200  | -0.54112200 |
| H             | -1.51251000 | -0.78611000 | -0.61824800 |
| O             | -1.21687000 | 2.08032700  | 1.18599300  |
| O             | -0.43589900 | -0.25227400 | 1.89385300  |
| C             | -2.98471100 | 0.13410200  | 1.46793300  |
| C             | -3.29883400 | -1.22210300 | 1.42685900  |
| C             | -3.97457000 | 1.09915200  | 1.66022500  |
| C             | -4.62008400 | -1.62728800 | 1.55510300  |
| H             | -2.52313100 | -1.96416200 | 1.25842900  |
| C             | -5.28790200 | 0.69650300  | 1.80520700  |

|    |             |             |             |
|----|-------------|-------------|-------------|
| H  | -3.70520800 | 2.15036600  | 1.66741800  |
| C  | -5.61956500 | -0.66353300 | 1.73238300  |
| H  | -4.85514000 | -2.68321200 | 1.48641400  |
| H  | -6.08668600 | 1.41882800  | 1.93760300  |
| O  | -0.94936100 | -2.56741800 | -1.00139800 |
| O  | -2.75653200 | -3.82914800 | -0.80911000 |
| C  | -1.60732900 | -3.75971500 | -1.18050000 |
| C  | -0.88422100 | -4.86456600 | -1.88342700 |
| H  | -0.27379700 | -4.48933500 | -2.70644700 |
| H  | -0.20017900 | -5.35606100 | -1.18955300 |
| H  | -1.61826000 | -5.58502000 | -2.24382800 |
| C  | -3.15690800 | 1.12803900  | -1.54664100 |
| C  | -3.77193700 | 2.37713300  | -1.44158800 |
| C  | -3.96065800 | -0.01352500 | -1.64327100 |
| C  | -5.16024200 | 2.48883100  | -1.43672000 |
| H  | -3.14694500 | 3.26413700  | -1.35472600 |
| C  | -5.34640600 | 0.09393100  | -1.61671300 |
| H  | -3.50233900 | -1.00153000 | -1.70744000 |
| C  | -5.95098000 | 1.34683300  | -1.51965200 |
| H  | -5.62351900 | 3.46864900  | -1.35504700 |
| H  | -5.95798100 | -0.80408600 | -1.66817700 |
| H  | -7.03451800 | 1.42785000  | -1.49788200 |
| Cs | 4.08113800  | -3.44126700 | 0.27806800  |
| H  | 3.71034100  | 0.72810700  | 2.48074800  |
| C  | 2.21848500  | 2.29494000  | 2.56552000  |
| H  | 1.43012300  | 2.65711700  | 1.89060900  |
| C  | 1.57784900  | 1.98627600  | 3.91167800  |
| H  | 2.31852700  | 1.58560800  | 4.61660600  |
| H  | 1.14963900  | 2.88627200  | 4.36632100  |
| H  | 0.77847300  | 1.24617000  | 3.80842300  |
| C  | 3.28256300  | 3.37510600  | 2.70322800  |
| H  | 2.85159500  | 4.31634800  | 3.06403500  |
| H  | 4.05409200  | 3.07044300  | 3.42258500  |
| H  | 3.77261000  | 3.58144900  | 1.74727100  |
| O  | -6.94146300 | -0.94511700 | 1.82416100  |
| C  | -7.32330800 | -2.30206900 | 1.70208500  |
| H  | -8.40959700 | -2.31878200 | 1.78226400  |
| H  | -7.02276500 | -2.71877200 | 0.73246800  |
| H  | -6.89142500 | -2.91755600 | 2.50090900  |
| H  | -1.20342500 | 2.02355400  | -1.40550600 |
| C  | -1.14738300 | 0.54431600  | -2.93541000 |
| H  | -1.46594300 | -0.48806900 | -3.12307300 |
| H  | -1.55047300 | 1.17430600  | -3.73276700 |
| H  | -0.05538000 | 0.60474400  | -2.96796800 |

**Int3-R**

|   |             |             |             |
|---|-------------|-------------|-------------|
| C | 1.16525900  | 3.40292600  | 0.82512500  |
| H | 1.81035600  | 4.27231700  | 0.99924700  |
| C | 0.19123400  | 3.72963800  | -0.28782800 |
| C | 0.64982200  | 4.40899500  | -1.42873500 |
| C | -0.20477000 | 4.65194900  | -2.49060100 |
| H | 1.69118600  | 4.71898400  | -1.47553500 |
| C | -2.00224400 | 3.53701800  | -1.33781000 |
| C | -1.52992000 | 4.19718900  | -2.45880700 |
| H | 0.16331600  | 5.18426800  | -3.36382200 |
| H | -3.02782700 | 3.18918800  | -1.25393500 |
| H | -2.18444000 | 4.37368700  | -3.30738900 |
| S | 3.56280600  | 1.99061200  | 0.97380700  |
| C | 3.31253300  | 0.27465600  | 1.40707300  |
| C | 2.06064300  | -0.19373500 | 1.79512900  |
| C | 4.39606700  | -0.60354600 | 1.33009300  |
| C | 1.86069900  | -1.54442000 | 2.05188300  |
| H | 1.20776200  | 0.47850800  | 1.83327300  |
| C | 4.21159500  | -1.94978700 | 1.61096000  |
| H | 5.36842000  | -0.22824100 | 1.02475200  |
| C | 2.93527700  | -2.43436300 | 1.94623400  |
| H | 0.86170700  | -1.89547500 | 2.28372400  |
| H | 5.03747600  | -2.65357400 | 1.55741900  |
| O | 3.60076800  | 2.82802800  | 2.16957900  |
| O | 4.65897900  | 2.03179800  | 0.01767500  |
| N | 2.05327300  | 2.35981000  | 0.24042600  |
| C | 1.53858100  | 1.48486200  | -0.74805400 |
| O | 2.31037500  | 0.79442600  | -1.39728500 |
| C | -2.16244500 | -1.32726100 | -0.12666600 |
| H | -2.48780400 | -1.80335400 | 0.80786400  |
| C | -0.73135000 | -1.76364400 | -0.37833900 |
| O | -0.35981600 | -2.94277500 | -0.24317300 |
| C | -3.06522400 | -1.85074200 | -1.26097600 |
| H | -2.72595600 | -1.40162000 | -2.20576500 |
| C | -3.18509700 | -3.36756700 | -1.41639700 |
| H | -2.22134600 | -3.76133200 | -1.76829600 |
| C | -3.30526400 | 0.67125000  | 0.58510900  |
| C | -5.50347900 | 0.12189800  | 1.54450800  |
| C | -5.34382900 | 0.87844700  | 2.85532800  |
| H | -6.32672500 | 1.07469600  | 3.29739500  |
| H | -4.76649300 | 0.28173500  | 3.56854300  |
| H | -4.82973100 | 1.82566900  | 2.69096000  |
| C | -6.19135400 | -1.21580300 | 1.77715100  |
| H | -6.28624000 | -1.76830100 | 0.83614800  |

|    |             |             |             |
|----|-------------|-------------|-------------|
| H  | -5.61659400 | -1.83119900 | 2.47578800  |
| H  | -7.19301800 | -1.06587600 | 2.19163100  |
| C  | -6.27251200 | 0.93069900  | 0.50836300  |
| H  | -5.80355000 | 1.89977900  | 0.33960000  |
| H  | -6.31102700 | 0.38687700  | -0.44160900 |
| H  | -7.30169400 | 1.08695800  | 0.84883200  |
| O  | 0.10221800  | -0.86024700 | -0.80410100 |
| O  | -4.20627300 | -0.28008800 | 1.02452300  |
| O  | -3.50534200 | 1.88102000  | 0.75527700  |
| N  | -2.23539600 | 0.12604400  | -0.01243600 |
| Pd | -0.42074200 | 1.12419600  | -0.57304800 |
| C  | -1.15702000 | 3.31884300  | -0.22892900 |
| H  | -1.62760700 | 2.96426000  | 0.68539300  |
| Cs | 2.56198400  | -2.21260700 | -1.55092200 |
| C  | 0.51704200  | 3.00302800  | 2.13821900  |
| H  | -0.09855500 | 3.82294900  | 2.51896000  |
| H  | -0.13546600 | 2.13076700  | 2.01322800  |
| H  | 1.27972400  | 2.77403300  | 2.88352000  |
| O  | 2.82499900  | -3.77558500 | 2.08333300  |
| C  | 1.51673700  | -4.29213500 | 2.33017100  |
| H  | 0.82022500  | -4.00987800 | 1.53014700  |
| H  | 1.62998200  | -5.37466300 | 2.36634900  |
| H  | 1.13115500  | -3.93840500 | 3.29326300  |
| H  | -4.06413400 | -1.43998900 | -1.06563300 |
| C  | -4.24781800 | -3.68300600 | -2.46179100 |
| H  | -4.32807300 | -4.75967900 | -2.64612500 |
| H  | -5.23324300 | -3.33242900 | -2.12861900 |
| H  | -4.03562000 | -3.19344400 | -3.41866700 |
| C  | -3.50607100 | -4.05244800 | -0.09323000 |
| H  | -4.36653200 | -3.57812700 | 0.39617600  |
| H  | -3.74976700 | -5.10994100 | -0.24358100 |
| H  | -2.65467300 | -3.99980500 | 0.59110600  |

**Int3-S**

|   |             |             |             |
|---|-------------|-------------|-------------|
| C | 1.05940300  | -1.92661000 | 1.75533800  |
| H | 1.84774500  | -2.41726000 | 2.33729900  |
| C | 0.54899500  | -2.89618300 | 0.71544700  |
| C | 1.48492700  | -3.67917600 | 0.02523200  |
| C | -0.80768000 | -2.96430300 | 0.34249200  |
| C | 1.09268200  | -4.48405000 | -1.03278300 |
| H | 2.53023400  | -3.63604800 | 0.32644400  |
| C | -1.18698000 | -3.75592000 | -0.76072200 |
| H | -1.60615400 | -2.53565400 | 0.94946500  |
| C | -0.24285300 | -4.50325500 | -1.44653100 |
| H | 1.83147900  | -5.08973600 | -1.55152600 |

|    |             |             |             |
|----|-------------|-------------|-------------|
| H  | -2.23913000 | -3.76170400 | -1.02439500 |
| H  | -0.54074100 | -5.11477900 | -2.29299800 |
| S  | 2.94886400  | 0.07884100  | 1.70201700  |
| C  | 4.42327700  | -0.20970100 | 0.75978800  |
| C  | 4.50343300  | -1.17585000 | -0.24360500 |
| C  | 5.53722300  | 0.55603800  | 1.09505600  |
| C  | 5.70119100  | -1.37009900 | -0.90833200 |
| H  | 3.62540100  | -1.75341000 | -0.51493600 |
| C  | 6.74229500  | 0.36391000  | 0.42988100  |
| H  | 5.46684300  | 1.30415200  | 1.87981400  |
| C  | 6.82652300  | -0.60407600 | -0.57749400 |
| H  | 5.79144600  | -2.10805200 | -1.69840200 |
| H  | 7.60244600  | 0.96489000  | 0.70199300  |
| O  | 3.12410100  | -0.47168600 | 3.04303900  |
| O  | 2.60232100  | 1.49890800  | 1.56464900  |
| N  | 1.75104400  | -0.87135900 | 0.96128300  |
| C  | 1.20242500  | -0.43967000 | -0.28836700 |
| O  | 1.89517100  | 0.29047300  | -0.98411300 |
| C  | -3.17157800 | 1.02751300  | -0.61642300 |
| H  | -3.97345000 | 1.19742500  | -1.34821100 |
| C  | -1.96127700 | 1.80313400  | -1.10341600 |
| O  | -2.00479100 | 3.02138100  | -1.31680800 |
| C  | -3.63157000 | 1.59805900  | 0.74155700  |
| H  | -2.79823400 | 1.49750000  | 1.45530800  |
| C  | -4.17111000 | 3.02968000  | 0.77091800  |
| H  | -3.33891200 | 3.72351800  | 0.59556800  |
| C  | -3.85335100 | -1.26804600 | -0.31163900 |
| C  | -6.29383000 | -1.41427400 | -0.05502500 |
| C  | -6.53761800 | -2.59876000 | -0.97934400 |
| H  | -7.50122700 | -3.06478900 | -0.74552800 |
| H  | -6.56750900 | -2.26558400 | -2.02128600 |
| H  | -5.74683300 | -3.34047000 | -0.87084700 |
| C  | -7.38858100 | -0.37089400 | -0.22660100 |
| H  | -7.22236200 | 0.47744800  | 0.44578500  |
| H  | -7.40604700 | 0.00604400  | -1.25340900 |
| H  | -8.36811500 | -0.80267800 | 0.00151700  |
| C  | -6.20550700 | -1.83798600 | 1.40519800  |
| H  | -5.43556000 | -2.59494300 | 1.55146300  |
| H  | -5.97442300 | -0.97264400 | 2.03613100  |
| H  | -7.16905800 | -2.24288500 | 1.73244600  |
| O  | -0.83339200 | 1.15803200  | -1.24798400 |
| O  | -5.09924100 | -0.68963700 | -0.45712500 |
| N  | -2.85726400 | -0.39277600 | -0.50675600 |
| Pd | -0.75781100 | -0.75318200 | -0.50453400 |

|    |             |             |             |
|----|-------------|-------------|-------------|
| Cs | 1.13514000  | 3.22393300  | -0.60138800 |
| O  | -3.72148800 | -2.46854400 | -0.03998100 |
| C  | 0.02518500  | -1.35214200 | 2.70451900  |
| H  | 0.51473000  | -0.70579500 | 3.43601900  |
| H  | -0.72271200 | -0.76105600 | 2.16201300  |
| H  | -0.49309300 | -2.15112700 | 3.24232500  |
| O  | 7.94680400  | -0.87088100 | -1.28976000 |
| C  | 9.10121200  | -0.10696900 | -0.99836100 |
| H  | 9.87628000  | -0.46110200 | -1.67693200 |
| H  | 8.93055800  | 0.96334100  | -1.17020900 |
| H  | 9.43264800  | -0.25300500 | 0.03729800  |
| H  | -4.42170700 | 0.92892600  | 1.10459100  |
| C  | -5.20685800 | 3.26994000  | -0.32041900 |
| H  | -5.98531400 | 2.49636900  | -0.30205900 |
| H  | -5.69932500 | 4.23986700  | -0.19145800 |
| H  | -4.74436800 | 3.26111500  | -1.31099400 |
| C  | -4.76024000 | 3.31111800  | 2.14823600  |
| H  | -5.10850500 | 4.34589400  | 2.23600800  |
| H  | -5.62104600 | 2.65761200  | 2.34214500  |
| H  | -4.03196600 | 3.13322900  | 2.94754300  |

**Int4-R**

|   |             |             |             |
|---|-------------|-------------|-------------|
| C | 1.11272600  | 3.51482000  | 0.43073500  |
| H | 1.73513400  | 4.41532100  | 0.43734800  |
| C | -0.07926200 | 3.76301300  | -0.46847000 |
| C | -0.39911500 | 5.07332500  | -0.82435400 |
| C | -1.51620000 | 5.34599200  | -1.61150900 |
| H | 0.23825400  | 5.88953400  | -0.48458400 |
| C | -1.99081200 | 2.98178600  | -1.70532800 |
| C | -2.31222500 | 4.29511500  | -2.05422900 |
| H | -1.75456500 | 6.37060900  | -1.88327100 |
| H | -2.61848800 | 2.16861500  | -2.07266100 |
| H | -3.18050400 | 4.49338100  | -2.67908100 |
| S | 3.64284300  | 2.41939800  | 0.27081400  |
| C | 3.77491800  | 0.76862000  | 0.94239800  |
| C | 2.77890100  | 0.28021100  | 1.77938900  |
| C | 4.81671000  | -0.05919700 | 0.52694500  |
| C | 2.77478800  | -1.05529000 | 2.16089500  |
| H | 1.94587100  | 0.91428700  | 2.07067600  |
| C | 4.83205300  | -1.38966400 | 0.92070800  |
| H | 5.57796900  | 0.33549600  | -0.13879800 |
| C | 3.78530000  | -1.90332900 | 1.70164900  |
| H | 1.94162600  | -1.43270200 | 2.74098900  |
| H | 5.62304500  | -2.06223600 | 0.59990300  |
| O | 3.76967500  | 3.40423700  | 1.34245600  |

|    |             |             |             |
|----|-------------|-------------|-------------|
| O  | 4.51068300  | 2.48814700  | -0.89572300 |
| N  | 1.97396900  | 2.44962300  | -0.15215500 |
| C  | 1.44336100  | 1.31960100  | -0.78595200 |
| O  | 2.19529500  | 0.55703800  | -1.39629800 |
| C  | -2.19659600 | -1.64663900 | 0.21525500  |
| H  | -2.72194700 | -2.08923800 | 1.07199000  |
| C  | -0.72966400 | -2.09259900 | 0.31107000  |
| O  | -0.47088700 | -3.31093900 | 0.34783300  |
| C  | -2.86928600 | -2.13818300 | -1.07457100 |
| H  | -2.34638000 | -1.68299300 | -1.92949100 |
| C  | -2.98391700 | -3.64985700 | -1.27333800 |
| H  | -1.97282500 | -4.05710900 | -1.39910100 |
| C  | -3.35363700 | 0.36461700  | 0.70874300  |
| C  | -5.73485200 | 0.19630200  | 1.38223600  |
| C  | -5.71842100 | 1.10593100  | 2.59783700  |
| H  | -6.74509400 | 1.38300200  | 2.85568300  |
| H  | -5.28460900 | 0.58706700  | 3.45702300  |
| H  | -5.15107400 | 2.01851500  | 2.41447700  |
| C  | -6.53056600 | -1.06827200 | 1.65605500  |
| H  | -6.51196400 | -1.73109100 | 0.78637700  |
| H  | -6.11502900 | -1.61043000 | 2.50941800  |
| H  | -7.57101700 | -0.81737300 | 1.87818300  |
| C  | -6.24461200 | 0.88775200  | 0.12908900  |
| H  | -5.70864300 | 1.81388000  | -0.07935500 |
| H  | -6.15550200 | 0.22420900  | -0.73662400 |
| H  | -7.30410400 | 1.12866300  | 0.25713800  |
| O  | 0.17029500  | -1.17806600 | 0.32504400  |
| O  | -4.38189600 | -0.35603900 | 1.14109000  |
| O  | -3.48772100 | 1.68884600  | 0.77839700  |
| N  | -2.27697700 | -0.18594700 | 0.27406300  |
| Pd | -0.40315000 | 0.80873100  | -0.34748800 |
| C  | -0.88339600 | 2.68695400  | -0.89304800 |
| H  | -2.68146200 | 2.08623700  | 0.38573200  |
| Cs | 2.22862400  | -2.41896900 | -1.32175100 |
| C  | 0.69007500  | 3.21489400  | 1.86467400  |
| H  | 0.07910000  | 4.03705200  | 2.25013200  |
| H  | 0.08564400  | 2.29963000  | 1.89587900  |
| H  | 1.56147900  | 3.10480700  | 2.51557600  |
| O  | 3.78385000  | -3.25225100 | 1.88516000  |
| C  | 2.63817700  | -3.80788000 | 2.52350500  |
| H  | 1.71507700  | -3.57758000 | 1.97039900  |
| H  | 2.79883900  | -4.88538900 | 2.53746600  |
| H  | 2.53990600  | -3.44711400 | 3.55375000  |
| H  | -3.88426500 | -1.71094500 | -1.08343400 |

|               |             |             |             |
|---------------|-------------|-------------|-------------|
| C             | -3.79187100 | -3.93229100 | -2.53359200 |
| H             | -3.84547700 | -5.00520100 | -2.74496700 |
| H             | -4.82184400 | -3.56835500 | -2.42772000 |
| H             | -3.36242100 | -3.43889500 | -3.41266300 |
| C             | -3.60082100 | -4.33292000 | -0.06004900 |
| H             | -4.55061500 | -3.85786000 | 0.22089300  |
| H             | -3.80927300 | -5.38831800 | -0.26397400 |
| H             | -2.92359400 | -4.28656800 | 0.79694500  |
| <b>Int4-S</b> |             |             |             |
| C             | -1.16774700 | 1.45335400  | 1.97113600  |
| H             | -1.94526700 | 1.81131000  | 2.65221400  |
| C             | -0.64191900 | 2.63594000  | 1.19325700  |
| C             | -0.94520600 | 3.92577600  | 1.62825100  |
| C             | 0.12174600  | 2.42513400  | 0.02986100  |
| C             | -0.51610500 | 5.04119200  | 0.91068600  |
| H             | -1.53593600 | 4.05764800  | 2.53525300  |
| C             | 0.48953800  | 3.56207700  | -0.71038800 |
| H             | 2.45850900  | 2.65323100  | -0.40697600 |
| C             | 0.18988300  | 4.85482200  | -0.27157600 |
| H             | -0.75594900 | 6.04199700  | 1.25961500  |
| H             | 1.00540000  | 3.44398300  | -1.66423800 |
| H             | 0.49851500  | 5.71248300  | -0.86533600 |
| S             | -3.21951500 | -0.35101300 | 1.63754500  |
| C             | -4.58144800 | 0.13514100  | 0.62042900  |
| C             | -5.30669700 | 1.27753300  | 0.97172000  |
| C             | -4.92998300 | -0.61120100 | -0.49933400 |
| C             | -6.38195100 | 1.66767000  | 0.19490500  |
| H             | -5.02929800 | 1.83971300  | 1.85798300  |
| C             | -6.01281600 | -0.22539000 | -1.27912900 |
| H             | -4.34004900 | -1.48120000 | -0.76137000 |
| C             | -6.73968300 | 0.91986500  | -0.93528200 |
| H             | -6.96684400 | 2.54718800  | 0.44185100  |
| H             | -6.27771400 | -0.81281800 | -2.15074300 |
| O             | -3.45765400 | 0.16558600  | 2.98191500  |
| O             | -2.98214600 | -1.78679100 | 1.44668800  |
| N             | -1.85824900 | 0.51061100  | 1.04732500  |
| C             | -1.33607500 | 0.13842100  | -0.20713700 |
| O             | -2.00146800 | -0.60999700 | -0.92255300 |
| C             | 3.24280500  | -1.03942700 | -0.61959600 |
| H             | 3.99215200  | -1.21803300 | -1.40299300 |
| C             | 2.07510200  | -1.99354900 | -0.89490800 |
| O             | 2.26699700  | -3.21855400 | -0.80996100 |
| C             | 3.88831500  | -1.31040400 | 0.74800500  |
| H             | 3.12119900  | -1.17725900 | 1.52548800  |



|               |             |             |             |
|---------------|-------------|-------------|-------------|
| C             | 4.59864000  | -2.65239900 | 0.94100200  |
| H             | 3.83800400  | -3.43931400 | 0.99618900  |
| C             | 3.69140700  | 1.27290100  | -0.75233500 |
| C             | 6.08752700  | 1.90737200  | -0.67029800 |
| C             | 6.11649200  | 3.02968200  | -1.69291300 |
| H             | 7.03164200  | 3.61540500  | -1.56161000 |
| H             | 6.12119200  | 2.62174300  | -2.70741300 |
| H             | 5.26210900  | 3.69855200  | -1.58778300 |
| C             | 7.29043000  | 0.99339300  | -0.82916500 |
| H             | 7.25943300  | 0.18377400  | -0.09392800 |
| H             | 7.31027500  | 0.54926900  | -1.82784500 |
| H             | 8.21465900  | 1.55881100  | -0.68240200 |
| C             | 5.98573500  | 2.41101500  | 0.75923500  |
| H             | 5.14017400  | 3.08526300  | 0.89829400  |
| H             | 5.88917600  | 1.57158600  | 1.45527400  |
| H             | 6.90063100  | 2.95314600  | 1.01610700  |
| O             | 0.94001500  | -1.47101700 | -1.19017100 |
| O             | 4.97068100  | 0.98133300  | -0.96715500 |
| N             | 2.79057900  | 0.35928600  | -0.67944400 |
| Pd            | 0.56316100  | 0.54733500  | -0.54741500 |
| Cs            | -0.94266100 | -3.43463800 | -0.20315200 |
| O             | 3.40191100  | 2.57068300  | -0.65360800 |
| C             | -0.10711200 | 0.73022600  | 2.79215800  |
| H             | -0.55362900 | -0.09099800 | 3.36200900  |
| H             | 0.67213200  | 0.33046000  | 2.13144300  |
| H             | 0.36190700  | 1.42283500  | 3.49761500  |
| O             | -7.80622900 | 1.38400800  | -1.62974500 |
| C             | -8.18872100 | 0.66895900  | -2.78826800 |
| H             | -9.04734400 | 1.19857100  | -3.20005200 |
| H             | -7.38408900 | 0.64852100  | -3.53358000 |
| H             | -8.47953800 | -0.36177600 | -2.54976700 |
| H             | 4.62859900  | -0.51536700 | 0.91757600  |
| C             | 5.51500600  | -2.98295900 | -0.22944700 |
| H             | 6.18104200  | -2.14127500 | -0.46413900 |
| H             | 6.14540900  | -3.84971300 | -0.00513900 |
| H             | 4.93165300  | -3.21799300 | -1.12370900 |
| C             | 5.37481900  | -2.61783000 | 2.25188700  |
| H             | 5.85111600  | -3.58076300 | 2.46356500  |
| H             | 6.16944100  | -1.86012900 | 2.21546300  |
| H             | 4.72940300  | -2.37011600 | 3.10182100  |
| <b>Int5-R</b> |             |             |             |
| C             | -3.58660900 | 0.76690900  | 0.28346700  |
| H             | -4.45830900 | 1.42306100  | 0.19744200  |
| C             | -3.89125400 | -0.54403400 | -0.40263400 |

|   |             |             |             |
|---|-------------|-------------|-------------|
| C | -5.22127000 | -0.90015600 | -0.63153000 |
| C | -5.53842900 | -2.13729200 | -1.18535400 |
| H | -6.01491300 | -0.19927900 | -0.37280200 |
| C | -3.18563200 | -2.66418400 | -1.29446700 |
| C | -4.51565900 | -3.02027800 | -1.51912500 |
| H | -6.57626500 | -2.40528300 | -1.36349000 |
| H | -2.39829700 | -3.36369500 | -1.58001500 |
| H | -4.75066600 | -3.98662000 | -1.96031000 |
| S | -2.40244700 | 3.20133500  | -0.29098800 |
| C | -0.73546300 | 3.38318200  | 0.32624200  |
| C | -0.27296700 | 2.52756800  | 1.31859100  |
| C | 0.12202400  | 4.30714000  | -0.26740300 |
| C | 1.06861400  | 2.53151700  | 1.67969400  |
| H | -0.94389200 | 1.79640600  | 1.76327100  |
| C | 1.45754800  | 4.33903300  | 0.10800300  |
| H | -0.25607300 | 4.95976300  | -1.04840700 |
| C | 1.94495400  | 3.41878400  | 1.04874400  |
| H | 1.42340900  | 1.80620600  | 2.40395300  |
| H | 2.15337100  | 5.04102000  | -0.34305700 |
| O | -3.36060800 | 3.53271000  | 0.75919300  |
| O | -2.46476800 | 3.86433400  | -1.58441900 |
| N | -2.49107100 | 1.48336600  | -0.43201200 |
| C | -1.39708300 | 0.83152200  | -0.99746100 |
| O | -0.61434000 | 1.45018500  | -1.71920100 |
| C | 1.43580400  | -2.85139100 | -0.06757800 |
| H | 2.14433500  | -3.51657300 | 0.44134600  |
| C | 1.98004900  | -1.41433700 | 0.06598200  |
| O | 3.20589300  | -1.23917500 | -0.03890800 |
| C | 1.29567300  | -3.25134800 | -1.53816700 |
| H | 0.51280500  | -2.61561300 | -1.98656300 |
| C | 2.56586400  | -3.18026200 | -2.38474000 |
| H | 2.88785400  | -2.12856100 | -2.42000100 |
| C | -0.07414700 | -2.84082100 | 1.92905300  |
| C | 0.96178500  | -1.55448600 | 3.71266900  |
| C | -0.14959800 | -0.52695700 | 3.56826200  |
| H | -0.04258700 | 0.25374100  | 4.32846100  |
| H | -0.08125700 | -0.06694200 | 2.57446100  |
| H | -1.13672200 | -0.97979800 | 3.67232600  |
| C | 2.32213000  | -0.87966600 | 3.74204500  |
| H | 3.12529300  | -1.62017000 | 3.78656500  |
| H | 2.46062900  | -0.29054200 | 2.83006700  |
| H | 2.40335200  | -0.22425100 | 4.61479600  |
| C | 0.75931900  | -2.48543800 | 4.89245600  |
| H | -0.19916500 | -3.00050100 | 4.81610300  |

|               |             |             |             |
|---------------|-------------|-------------|-------------|
| H             | 1.55939600  | -3.22964000 | 4.93778100  |
| H             | 0.77681700  | -1.91170400 | 5.82454300  |
| O             | 1.12274600  | -0.46906500 | 0.20163900  |
| O             | 1.04478800  | -2.33882900 | 2.46754700  |
| O             | -1.10223700 | -3.13253100 | 2.50269900  |
| N             | 0.09478300  | -2.96572900 | 0.54115000  |
| Pd            | -0.95220300 | -0.95396700 | -0.32022300 |
| C             | -2.85188900 | -1.43246900 | -0.71782400 |
| Cs            | 2.36438800  | 1.35438900  | -1.75561300 |
| C             | -3.27409800 | 0.55362200  | 1.75947000  |
| H             | -4.11612000 | 0.05343500  | 2.24668000  |
| H             | -2.39959100 | -0.10102700 | 1.85774700  |
| H             | -3.09706700 | 1.50346200  | 2.27240000  |
| O             | 3.29474600  | 3.41055700  | 1.22708200  |
| C             | 3.82662200  | 2.36446400  | 2.02941000  |
| H             | 3.57628600  | 1.37607800  | 1.61643300  |
| H             | 4.90739100  | 2.50108000  | 2.02319800  |
| H             | 3.46272000  | 2.41981100  | 3.06231500  |
| H             | 0.90865300  | -4.28242700 | -1.57910300 |
| C             | 2.25836000  | -3.64006700 | -3.80388200 |
| H             | 3.13467100  | -3.54706600 | -4.45308700 |
| H             | 1.95708600  | -4.69426100 | -3.81409300 |
| H             | 1.44230500  | -3.06420200 | -4.25335400 |
| C             | 3.70803700  | -3.98349400 | -1.77663000 |
| H             | 3.40761600  | -5.02564300 | -1.60904800 |
| H             | 4.57494000  | -3.99870200 | -2.44501900 |
| H             | 4.02737500  | -3.55253100 | -0.82439000 |
| H             | -0.48809900 | -3.71063300 | 0.17486800  |
| <b>Int5-S</b> |             |             |             |
| C             | -1.31097100 | -0.78429700 | 2.55154600  |
| H             | -2.21659500 | -1.03327600 | 3.11162500  |
| C             | -0.74549600 | 0.49581200  | 3.11571500  |
| C             | -1.11462000 | 0.88556500  | 4.40583200  |
| C             | 0.18618600  | 1.25016500  | 2.38961700  |
| C             | -0.56789700 | 2.02679400  | 4.98535100  |
| H             | -1.83842900 | 0.28632900  | 4.95917000  |
| C             | 0.72053400  | 2.40551700  | 2.97649100  |
| C             | 0.35095500  | 2.78730300  | 4.26644100  |
| H             | -0.86442500 | 2.32417900  | 5.98773500  |
| H             | 1.42980000  | 3.01771000  | 2.41843000  |
| H             | 0.77648600  | 3.68705000  | 4.70604500  |
| S             | -3.04232200 | -1.61276700 | 0.58592800  |
| C             | -4.26592500 | -0.50337400 | -0.03466100 |
| C             | -5.17542100 | 0.05602300  | 0.86837500  |

|    |             |             |             |
|----|-------------|-------------|-------------|
| C  | -4.33230400 | -0.20639400 | -1.39070200 |
| C  | -6.15125200 | 0.91697800  | 0.40402500  |
| H  | -5.11749700 | -0.19973900 | 1.92175200  |
| C  | -5.31583000 | 0.65407800  | -1.86163800 |
| H  | -3.60573200 | -0.64205800 | -2.06598800 |
| C  | -6.22603300 | 1.22204300  | -0.96271800 |
| H  | -6.87388000 | 1.36668900  | 1.07647000  |
| H  | -5.36130200 | 0.88136000  | -2.92050900 |
| O  | -3.57551900 | -2.25593500 | 1.78220600  |
| O  | -2.54500000 | -2.44358500 | -0.51727800 |
| N  | -1.75548700 | -0.60712100 | 1.14298200  |
| C  | -0.99005600 | 0.05063300  | 0.17290800  |
| O  | -1.39617400 | 0.09113200  | -0.98916200 |
| C  | 3.70189800  | -0.18059400 | 0.15243600  |
| H  | 4.73883500  | -0.05995000 | -0.18616400 |
| C  | 2.87485000  | -0.62048600 | -1.07497400 |
| O  | 3.33337100  | -1.52365900 | -1.79203900 |
| C  | 3.63663400  | -1.20017800 | 1.29386600  |
| H  | 2.61991800  | -1.15820400 | 1.71689900  |
| C  | 3.99054400  | -2.64770800 | 0.96116100  |
| H  | 3.26936100  | -3.00724200 | 0.21224100  |
| C  | 3.32976900  | 2.30326300  | 0.00571100  |
| C  | 3.36377000  | 3.03899200  | -2.31049700 |
| C  | 1.87960100  | 3.35818100  | -2.24332500 |
| H  | 1.59899600  | 3.96150400  | -3.11203700 |
| H  | 1.29206500  | 2.43466200  | -2.25589600 |
| H  | 1.63066300  | 3.92076500  | -1.34150200 |
| C  | 3.69916400  | 2.26325500  | -3.57126700 |
| H  | 4.75522000  | 1.98054000  | -3.58455800 |
| H  | 3.09902100  | 1.35109300  | -3.62417600 |
| H  | 3.49416200  | 2.87526900  | -4.45417700 |
| C  | 4.23954400  | 4.26953400  | -2.15863400 |
| H  | 4.00786600  | 4.80727600  | -1.23875100 |
| H  | 5.29708400  | 3.99027200  | -2.14808100 |
| H  | 4.07685200  | 4.94059000  | -3.00819000 |
| O  | 1.73064900  | -0.06374200 | -1.24947800 |
| O  | 3.69170300  | 2.05835100  | -1.25385300 |
| N  | 3.19234100  | 1.09420600  | 0.70406000  |
| Pd | 0.81999800  | 0.68341900  | 0.59244000  |
| Cs | 0.17506000  | -2.41910600 | -2.01791200 |
| O  | 3.10844800  | 3.38284900  | 0.51995800  |
| C  | -0.34642900 | -1.96318000 | 2.64607000  |
| H  | -0.82774600 | -2.88787400 | 2.30907100  |
| H  | 0.53519600  | -1.76730700 | 2.02233100  |

|              |             |             |             |
|--------------|-------------|-------------|-------------|
| H            | -0.00843100 | -2.10512300 | 3.67695500  |
| O            | -7.21702600 | 2.07347600  | -1.31639600 |
| C            | -7.32106600 | 2.41903700  | -2.68445000 |
| H            | -8.16487000 | 3.10406400  | -2.75934600 |
| H            | -6.41376300 | 2.92022100  | -3.04355400 |
| H            | -7.51293100 | 1.53803400  | -3.30950800 |
| H            | 4.30837500  | -0.85420400 | 2.09589600  |
| C            | 5.38192700  | -2.77191700 | 0.35575700  |
| H            | 6.13908500  | -2.34563200 | 1.02638600  |
| H            | 5.64667700  | -3.82137500 | 0.19087300  |
| H            | 5.43222300  | -2.25832800 | -0.60721800 |
| C            | 3.85219100  | -3.50069000 | 2.21589700  |
| H            | 4.04967500  | -4.55636500 | 2.00476300  |
| H            | 4.56754100  | -3.18321900 | 2.98442100  |
| H            | 2.85013000  | -3.42652500 | 2.65303100  |
| H            | 3.35210100  | 1.22982700  | 1.69667500  |
| <b>TS1-R</b> |             |             |             |
| C            | 0.37011900  | 3.41010000  | 0.73068900  |
| H            | 0.85192900  | 4.33435600  | 1.06412800  |
| C            | -0.54043500 | 3.73829400  | -0.42947400 |
| C            | -0.48691700 | 5.00614400  | -1.00307500 |
| C            | -1.26639900 | 5.31047100  | -2.11704500 |
| H            | 0.18242700  | 5.75662600  | -0.58609000 |
| C            | -2.14709900 | 3.07308500  | -2.10553800 |
| C            | -2.09895100 | 4.34065100  | -2.67310000 |
| H            | -1.21943900 | 6.30484000  | -2.55365400 |
| H            | -2.81562600 | 2.31956800  | -2.51989900 |
| H            | -2.70648600 | 4.57741100  | -3.54271200 |
| S            | 2.96974000  | 2.54129700  | 1.07531300  |
| C            | 3.10183600  | 0.80575800  | 1.48161500  |
| C            | 1.97744100  | 0.07462900  | 1.85093600  |
| C            | 4.34495900  | 0.17952200  | 1.38148900  |
| C            | 2.06922400  | -1.29361800 | 2.07597200  |
| H            | 1.00204200  | 0.55138700  | 1.90177600  |
| C            | 4.45112300  | -1.18124600 | 1.63045700  |
| H            | 5.21186300  | 0.76141800  | 1.08370100  |
| C            | 3.30767900  | -1.93190600 | 1.94988300  |
| H            | 1.16870000  | -1.85654500 | 2.29233800  |
| H            | 5.40735100  | -1.69259300 | 1.56093200  |
| O            | 2.69676600  | 3.31278500  | 2.28603900  |
| O            | 4.11124500  | 2.87790000  | 0.23721100  |
| N            | 1.48701100  | 2.56503900  | 0.20423600  |
| C            | 1.28625500  | 1.57724600  | -0.78752900 |
| O            | 2.26527400  | 1.04271200  | -1.30444300 |

|    |             |             |             |
|----|-------------|-------------|-------------|
| C  | -2.00631600 | -1.82569000 | -0.21650300 |
| H  | -2.30781100 | -2.16884700 | 0.78381100  |
| C  | -0.50814400 | -2.12627600 | -0.35557100 |
| O  | -0.06892500 | -3.26208700 | -0.11180800 |
| C  | -2.84339200 | -2.59225400 | -1.25069700 |
| H  | -2.55989000 | -2.24119300 | -2.25327500 |
| C  | -2.79061900 | -4.11879300 | -1.19691600 |
| H  | -1.77407900 | -4.43791500 | -1.46126400 |
| C  | -3.18301900 | 0.20843400  | 0.32984900  |
| C  | -5.11281800 | -0.03011200 | 1.84475000  |
| C  | -4.47067800 | 0.72691400  | 2.99647600  |
| H  | -5.23496700 | 0.98623000  | 3.73587500  |
| H  | -3.72222500 | 0.10146000  | 3.49296500  |
| H  | -3.99249500 | 1.64500800  | 2.65388000  |
| C  | -5.79619500 | -1.29305400 | 2.34405000  |
| H  | -6.20739200 | -1.86398200 | 1.50664400  |
| H  | -5.08798500 | -1.93304900 | 2.87814700  |
| H  | -6.61425500 | -1.03905100 | 3.02400400  |
| C  | -6.08588200 | 0.82943300  | 1.05426800  |
| H  | -5.60959400 | 1.74058500  | 0.69239100  |
| H  | -6.47646800 | 0.27108000  | 0.19843200  |
| H  | -6.93268900 | 1.10436800  | 1.69132800  |
| O  | 0.26648800  | -1.16516600 | -0.74856600 |
| O  | -4.07932800 | -0.57957500 | 0.95744100  |
| O  | -3.28345600 | 1.48416700  | 0.39712200  |
| N  | -2.22666700 | -0.39241000 | -0.33762100 |
| Pd | -0.52774400 | 0.78769000  | -0.82174500 |
| C  | -1.38620000 | 2.74049800  | -0.96627700 |
| H  | -2.22668400 | 2.01130100  | -0.19419900 |
| Cs | 2.90280900  | -1.90770000 | -1.51896100 |
| C  | -0.35223400 | 2.79263900  | 1.92005100  |
| H  | -1.14429100 | 3.46532700  | 2.26340900  |
| H  | -0.82337200 | 1.84108300  | 1.65093300  |
| H  | 0.34364900  | 2.63414400  | 2.74727200  |
| O  | 3.48352900  | -3.27284200 | 2.04612200  |
| C  | 2.31956700  | -4.05907600 | 2.29899400  |
| H  | 1.56117400  | -3.92450100 | 1.51537300  |
| H  | 2.66120900  | -5.09325000 | 2.31600500  |
| H  | 1.88220600  | -3.81010200 | 3.27293900  |
| H  | -3.88456500 | -2.27130100 | -1.10090700 |
| C  | -3.76482200 | -4.69591100 | -2.21617200 |
| H  | -3.71535300 | -5.78943500 | -2.24559300 |
| H  | -4.79788400 | -4.42125300 | -1.96847200 |
| H  | -3.56326300 | -4.32464300 | -3.22695000 |

|              |             |             |             |
|--------------|-------------|-------------|-------------|
| C            | -3.08858200 | -4.64493900 | 0.20158700  |
| H            | -4.02000500 | -4.21463900 | 0.59442600  |
| H            | -3.20356000 | -5.73409400 | 0.19892600  |
| H            | -2.27840300 | -4.39805800 | 0.89325600  |
| <b>TS1-S</b> |             |             |             |
| C            | -0.84584500 | 1.75133900  | 1.67109400  |
| H            | -1.57037000 | 2.16010500  | 2.38244300  |
| C            | -0.56171000 | 2.80901600  | 0.62919000  |
| C            | -1.38060600 | 3.93742700  | 0.58503400  |
| C            | 0.41839900  | 2.59254900  | -0.36771900 |
| C            | -1.25838700 | 4.86573900  | -0.44687200 |
| H            | -2.13039600 | 4.08452300  | 1.36223500  |
| C            | 0.49771900  | 3.53708100  | -1.41180700 |
| H            | 1.71918000  | 2.31289600  | -0.15785200 |
| C            | -0.32077400 | 4.65942600  | -1.45616100 |
| H            | -1.89698100 | 5.74506800  | -0.46359100 |
| H            | 1.25860700  | 3.39570100  | -2.17705700 |
| H            | -0.22513200 | 5.37625800  | -2.26765200 |
| S            | -2.80952900 | -0.19199000 | 1.79585100  |
| C            | -4.26709300 | 0.18435700  | 0.86348700  |
| C            | -4.43741900 | 1.46100800  | 0.32335800  |
| C            | -5.26039700 | -0.77800500 | 0.73579900  |
| C            | -5.60469800 | 1.76637900  | -0.34949900 |
| H            | -3.64196000 | 2.19891300  | 0.40511300  |
| C            | -6.44117200 | -0.47319200 | 0.06571700  |
| H            | -5.10778500 | -1.76663500 | 1.15773800  |
| C            | -6.61470200 | 0.80275400  | -0.47989100 |
| H            | -5.76018100 | 2.74360600  | -0.79376800 |
| H            | -7.21133400 | -1.23025300 | -0.02977900 |
| O            | -2.90321500 | 0.42527900  | 3.11614600  |
| O            | -2.56915500 | -1.63758700 | 1.70409000  |
| N            | -1.57199900 | 0.64205900  | 0.97835900  |
| C            | -1.20028700 | 0.18304700  | -0.31455100 |
| O            | -1.96180100 | -0.58248200 | -0.89895300 |
| C            | 3.28248400  | -1.09420300 | -0.85145400 |
| H            | 4.08092600  | -1.22986700 | -1.59437100 |
| C            | 2.12461200  | -2.03138900 | -1.22104000 |
| O            | 2.32553700  | -3.23853300 | -1.39195900 |
| C            | 3.81050200  | -1.50385700 | 0.53900100  |
| H            | 2.97369100  | -1.43026300 | 1.25174300  |
| C            | 4.48522100  | -2.87037400 | 0.66816500  |
| H            | 3.72609000  | -3.65049900 | 0.53373300  |
| C            | 3.54714100  | 1.29842300  | -0.48784400 |
| C            | 5.79608800  | 2.06488800  | 0.16003500  |

|              |             |             |             |
|--------------|-------------|-------------|-------------|
| C            | 5.84781200  | 3.36062300  | -0.63184500 |
| H            | 6.62274300  | 4.01590100  | -0.22077100 |
| H            | 6.09714600  | 3.15663200  | -1.67708200 |
| H            | 4.89091700  | 3.88151700  | -0.59411400 |
| C            | 7.12329400  | 1.32664900  | 0.08404400  |
| H            | 7.07391700  | 0.38327600  | 0.63718400  |
| H            | 7.38050300  | 1.09936600  | -0.95396500 |
| H            | 7.92273900  | 1.93713400  | 0.51369500  |
| C            | 5.39400700  | 2.28475100  | 1.61041400  |
| H            | 4.45554200  | 2.83373800  | 1.69037600  |
| H            | 5.28789100  | 1.32519500  | 2.12776400  |
| H            | 6.17527400  | 2.85519900  | 2.12243600  |
| O            | 0.92574700  | -1.52640200 | -1.26613200 |
| O            | 4.88379100  | 1.11574700  | -0.48983200 |
| N            | 2.80078600  | 0.27961800  | -0.83813800 |
| Pd           | 0.70067300  | 0.48579900  | -0.75758900 |
| Cs           | -1.03797300 | -3.43824900 | -0.36154300 |
| O            | 3.04946300  | 2.43779900  | -0.18155400 |
| C            | 0.35726500  | 1.25155700  | 2.45503100  |
| H            | 0.03426300  | 0.53708900  | 3.21719100  |
| H            | 1.08767700  | 0.75920000  | 1.80384900  |
| H            | 0.85393900  | 2.08837000  | 2.95537100  |
| O            | -7.71962400 | 1.20220700  | -1.15512400 |
| C            | -8.75454300 | 0.25339900  | -1.32101200 |
| H            | -9.53973700 | 0.75645300  | -1.88394200 |
| H            | -8.41083700 | -0.62434600 | -1.88288300 |
| H            | -9.15733000 | -0.07850300 | -0.35564600 |
| H            | 4.53641600  | -0.74314000 | 0.84792200  |
| C            | 5.55195200  | -3.07705400 | -0.39950100 |
| H            | 6.24858600  | -2.22817500 | -0.43159900 |
| H            | 6.14046700  | -3.97896500 | -0.20056500 |
| H            | 5.10042900  | -3.18720500 | -1.38900100 |
| C            | 5.08113300  | -2.99785500 | 2.06516500  |
| H            | 5.52808500  | -3.98453400 | 2.22524100  |
| H            | 5.87130200  | -2.25128400 | 2.22124200  |
| H            | 4.32831600  | -2.84055700 | 2.84567200  |
| <b>TS2-R</b> |             |             |             |
| C            | 3.05204800  | 0.87255100  | -0.26164700 |
| H            | 2.81760100  | 1.33273300  | 0.70828400  |
| C            | 4.52920400  | 1.06258200  | -0.51640900 |
| C            | 5.22580700  | 2.05493200  | 0.17336500  |
| C            | 6.56689600  | 2.30238500  | -0.10331000 |
| H            | 4.71113300  | 2.62646600  | 0.94390900  |
| C            | 6.54059200  | 0.55345900  | -1.75866700 |



|   |             |             |             |
|---|-------------|-------------|-------------|
| C | 7.22757700  | 1.55314400  | -1.07245600 |
| H | 7.09866900  | 3.07472300  | 0.44586600  |
| H | 7.05375900  | -0.04227400 | -2.50906100 |
| H | 8.27619100  | 1.74037500  | -1.28681600 |
| S | 2.92885500  | -1.34341900 | 1.32554100  |
| C | 1.23855900  | -1.41729400 | 1.90265000  |
| C | 0.41803100  | -0.29652900 | 1.77777300  |
| C | 0.72898300  | -2.60521700 | 2.42498400  |
| C | -0.92845500 | -0.36909700 | 2.11343000  |
| H | 0.81119600  | 0.63854600  | 1.38324800  |
| C | -0.60539800 | -2.67357000 | 2.80188100  |
| H | 1.38136700  | -3.46937100 | 2.51643800  |
| C | -1.45163900 | -1.56559300 | 2.62171300  |
| H | -1.56158500 | 0.49899300  | 1.95543000  |
| H | -1.02461400 | -3.57925700 | 3.23254000  |
| O | 3.66823200  | -0.37606300 | 2.12723100  |
| O | 3.39940800  | -2.70800300 | 1.15711700  |
| N | 2.70002900  | -0.56667500 | -0.20307300 |
| C | 1.62413300  | -1.05922400 | -0.99617600 |
| O | 1.38791800  | -2.25988600 | -1.02148600 |
| C | -2.59066900 | 1.05813100  | -0.84677900 |
| H | -3.00998700 | 1.26636000  | 0.14911000  |
| C | -2.41982700 | -0.46201300 | -0.94858400 |
| O | -3.30269000 | -1.21691100 | -0.50267500 |
| C | -3.57590600 | 1.58478000  | -1.89806900 |
| H | -3.15079300 | 1.39223700  | -2.89260500 |
| C | -5.00572100 | 1.05049900  | -1.82604000 |
| H | -4.98040700 | -0.03135500 | -2.01414300 |
| C | -0.91020500 | 2.65967700  | -0.19477300 |
| C | -1.52946200 | 4.21930900  | 1.61239600  |
| C | -0.56192900 | 3.63010700  | 2.62700400  |
| H | -0.45284100 | 4.32048000  | 3.46919100  |
| H | -0.94472000 | 2.68370500  | 3.02399600  |
| H | 0.42295800  | 3.45838500  | 2.19244600  |
| C | -2.88933000 | 4.45904900  | 2.24852200  |
| H | -3.60360800 | 4.82487100  | 1.50604700  |
| H | -3.28500100 | 3.52988100  | 2.67128500  |
| H | -2.81111400 | 5.19844600  | 3.05024700  |
| C | -0.99400100 | 5.48914500  | 0.97291000  |
| H | -0.03005900 | 5.31236400  | 0.49532100  |
| H | -1.69598400 | 5.86321600  | 0.22227200  |
| H | -0.87084700 | 6.26397000  | 1.73611400  |
| O | -1.34849100 | -0.91334700 | -1.52016300 |
| O | -1.85824500 | 3.23449900  | 0.57290200  |

|              |             |             |             |
|--------------|-------------|-------------|-------------|
| O            | 0.30975100  | 3.04262100  | -0.12681500 |
| N            | -1.29218000 | 1.69053500  | -0.99496500 |
| Pd           | 0.33413900  | 0.36806400  | -1.43062800 |
| C            | 5.19922400  | 0.30999800  | -1.48335600 |
| Cs           | -1.25396500 | -3.64935400 | -0.56877100 |
| C            | 2.19659200  | 1.54570800  | -1.32689700 |
| H            | 2.44498800  | 1.18184900  | -2.33180000 |
| H            | 1.04584700  | 2.12885000  | -0.79863600 |
| H            | 2.47399400  | 2.60687500  | -1.37118600 |
| O            | -2.74665400 | -1.75066400 | 2.95348500  |
| C            | -3.64154300 | -0.66984700 | 2.70083200  |
| H            | -3.68357300 | -0.45351500 | 1.62638700  |
| H            | -4.61751800 | -1.00824000 | 3.04642100  |
| H            | -3.34924900 | 0.22657600  | 3.26268500  |
| H            | -3.59825600 | 2.67860100  | -1.78347700 |
| C            | -5.85225500 | 1.71099900  | -2.90651900 |
| H            | -6.87269100 | 1.31407500  | -2.91726400 |
| H            | -5.92314300 | 2.79316200  | -2.74042100 |
| H            | -5.42462000 | 1.56160500  | -3.90349500 |
| C            | -5.61916600 | 1.26482800  | -0.44758200 |
| H            | -5.52530000 | 2.31312900  | -0.13278000 |
| H            | -6.68457100 | 1.01227000  | -0.44277300 |
| H            | -5.12850700 | 0.63851000  | 0.30361600  |
| H            | 4.66565500  | -0.48134900 | -2.00544800 |
| <b>TS2-S</b> |             |             |             |
| C            | 1.38769000  | 1.71245800  | -2.04913000 |
| H            | 1.88606500  | 2.07459000  | -2.95472700 |
| C            | 1.68188100  | 2.70148100  | -0.93919500 |
| C            | 2.48243800  | 3.81502500  | -1.20132600 |
| C            | 1.18437600  | 2.51806200  | 0.35464700  |
| C            | 2.78394700  | 4.72769100  | -0.19279800 |
| H            | 2.89402200  | 3.94457000  | -2.19979700 |
| C            | 1.48228900  | 3.42855300  | 1.36293300  |
| C            | 2.28476100  | 4.53573800  | 1.09281100  |
| H            | 3.41288900  | 5.58652400  | -0.41174300 |
| H            | 1.08523700  | 3.27331600  | 2.36302000  |
| H            | 2.51867300  | 5.24625000  | 1.88145000  |
| S            | 3.67526800  | 0.16939000  | -1.89059100 |
| C            | 4.21469000  | 0.07539000  | -0.20613300 |
| C            | 4.44082900  | 1.25333500  | 0.51236200  |
| C            | 4.41113800  | -1.16843100 | 0.38293800  |
| C            | 4.86114000  | 1.17585500  | 1.82689700  |
| H            | 4.29213300  | 2.21944200  | 0.03745600  |
| C            | 4.84364900  | -1.24922200 | 1.70219400  |

|    |             |             |             |
|----|-------------|-------------|-------------|
| H  | 4.22513500  | -2.06215200 | -0.20300100 |
| C  | 5.06685500  | -0.07353800 | 2.42756800  |
| H  | 5.04479200  | 2.07153600  | 2.41170400  |
| H  | 5.00945100  | -2.22144500 | 2.15333100  |
| O  | 4.15967100  | 1.42610800  | -2.45343900 |
| O  | 3.94399000  | -1.10689400 | -2.53430100 |
| N  | 1.96184300  | 0.37416400  | -1.77720200 |
| C  | 1.15867800  | -0.61544600 | -1.19706600 |
| O  | 1.63240300  | -1.69770900 | -0.85128500 |
| C  | -3.41846500 | -0.62289900 | 0.38715600  |
| H  | -3.55919700 | -0.25575100 | 1.41881600  |
| C  | -2.50975500 | -1.85885400 | 0.50352100  |
| O  | -2.95035200 | -2.96508500 | 0.83708200  |
| C  | -4.79453400 | -0.97203300 | -0.19174100 |
| H  | -4.65287300 | -1.63908600 | -1.05259600 |
| C  | -5.77279800 | -1.60665700 | 0.79916100  |
| H  | -5.23823100 | -2.41286700 | 1.31813200  |
| C  | -2.90484900 | 1.66600200  | -0.25151000 |
| C  | -4.11008200 | 3.46133700  | 0.90738500  |
| C  | -2.88312000 | 3.92544300  | 1.67828800  |
| H  | -3.07741400 | 4.90937300  | 2.11696800  |
| H  | -2.66352700 | 3.23115400  | 2.49586200  |
| H  | -2.00551900 | 3.99901600  | 1.03526000  |
| C  | -5.32305100 | 3.39427300  | 1.82074400  |
| H  | -6.19446800 | 3.01623600  | 1.27899900  |
| H  | -5.13534700 | 2.73063900  | 2.66956200  |
| H  | -5.56054000 | 4.39027300  | 2.20544200  |
| C  | -4.39935700 | 4.33078200  | -0.30519100 |
| H  | -3.53598000 | 4.38394800  | -0.96780500 |
| H  | -5.25047300 | 3.93104600  | -0.86434600 |
| H  | -4.65719600 | 5.34312400  | 0.02273400  |
| O  | -1.24276600 | -1.68424500 | 0.25600700  |
| O  | -3.94993100 | 2.05613800  | 0.50250000  |
| N  | -2.71330300 | 0.37389000  | -0.39612000 |
| Pd | -0.72688500 | -0.06757300 | -0.94616700 |
| Cs | 0.00325900  | -4.19520900 | -0.11035100 |
| O  | -2.13316500 | 2.51999400  | -0.80689900 |
| C  | -0.10010100 | 1.53846900  | -2.33017900 |
| H  | -0.25712000 | 0.88977200  | -3.19942400 |
| H  | -1.11243000 | 1.81744400  | -1.39929100 |
| H  | -0.48159200 | 2.51656400  | -2.65295400 |
| O  | 5.48919700  | -0.03996500 | 3.71644000  |
| C  | 5.71880200  | -1.27836100 | 4.35583400  |
| H  | 6.04766100  | -1.04134200 | 5.36729200  |

|   |             |             |             |
|---|-------------|-------------|-------------|
| H | 4.80479200  | -1.88419800 | 4.40627500  |
| H | 6.49997700  | -1.85814700 | 3.84785900  |
| H | -5.23918700 | -0.04767600 | -0.58548900 |
| C | -6.25904800 | -0.58974800 | 1.82505200  |
| H | -6.80013600 | 0.22800700  | 1.33160900  |
| H | -6.94092700 | -1.04760900 | 2.54947400  |
| H | -5.43704700 | -0.13684100 | 2.38881400  |
| C | -6.95525100 | -2.21120800 | 0.05443900  |
| H | -7.67546600 | -2.66962300 | 0.74054400  |
| H | -7.49215900 | -1.44302000 | -0.51684100 |
| H | -6.63171900 | -2.98062000 | -0.65435600 |
| H | 0.56220500  | 1.64806600  | 0.57064800  |

#### 4. X-ray structure of (S)-2h (CCDC 1971018)

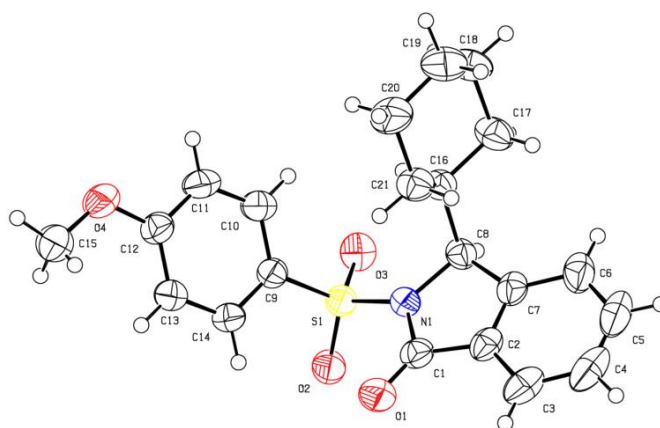

(S)-2h

#### 5. Reference

- [1] J. Blanchet, T. Macklin, P. Ang, C. Metallinos, V. Snieckus, *J. Org. Chem.*, 2007, **72**, 3199-3206.
- [2] G. Golime, G. Bogonda, H. Y. Kim, K. Oh, *ACS Catal.*, 2018, **8**, 4986-4990.
- [3] S. Bugge, S. J. Kaspersen, S. Larsen, U. Nonstad, G. Bjorkoy, E. Sundby, B. H. Hoff, *Eur. J. Med. Chem.*, 2014, **75**, 354-374.
- [4] P. L. Rinaldi, M. S. R. Naidu, W. E. Conaway, *J. Org. Chem.*, 1982, **47**, 3987-3991.
- [5] Y. Zhang, Z. Lu, A. Desai, W. D. Wulff, *Org. Lett.*, 2008, **10**, 5429-5432.
- [6] M. Kapoor, P. Chand-Thakuri, M. C. Young, *J. Am. Chem. Soc.*, 2009, **131**, 7980-7989.
- [7] D. R. Wallach, J. D. Chisholm, *J. Org. Chem.*, 2016, **81**, 8035-8042.

## 6. NMR Spectra

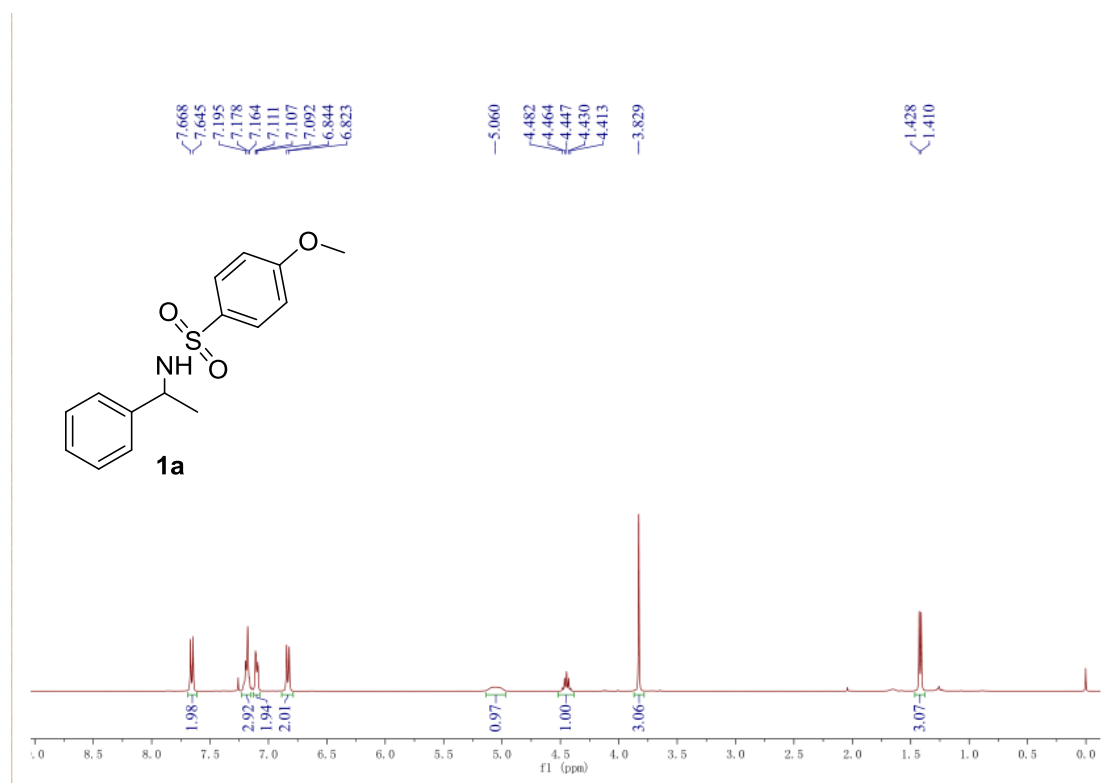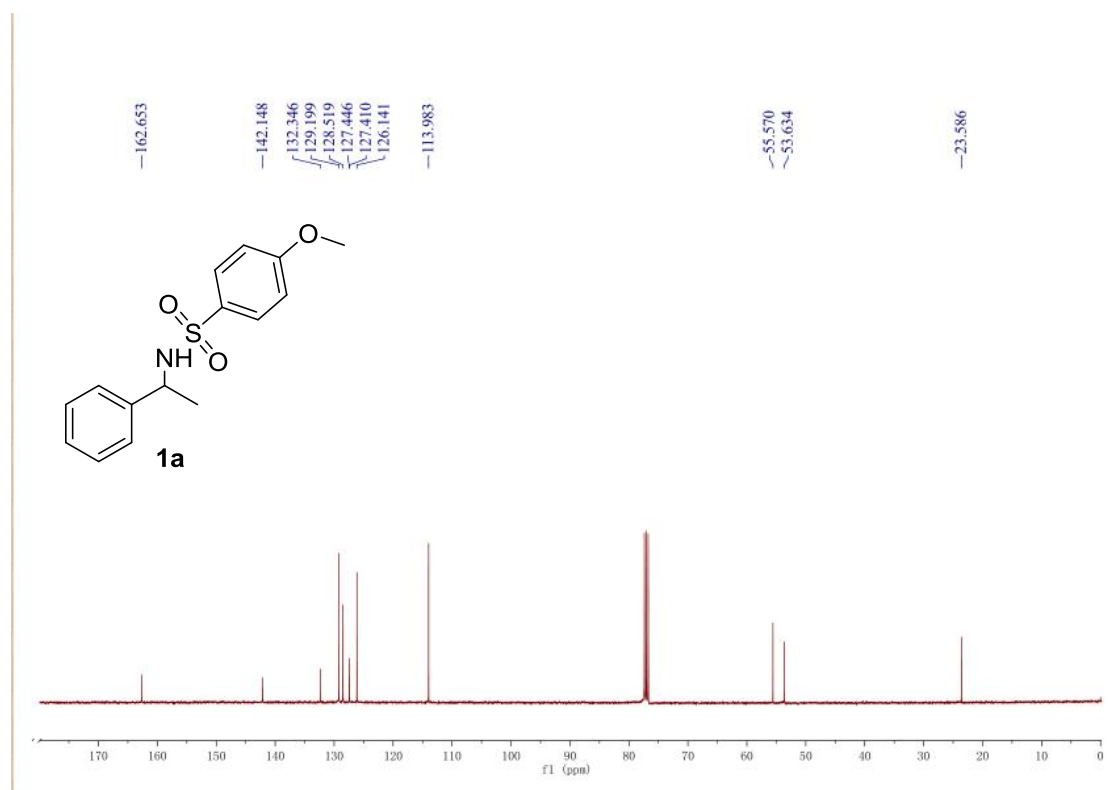

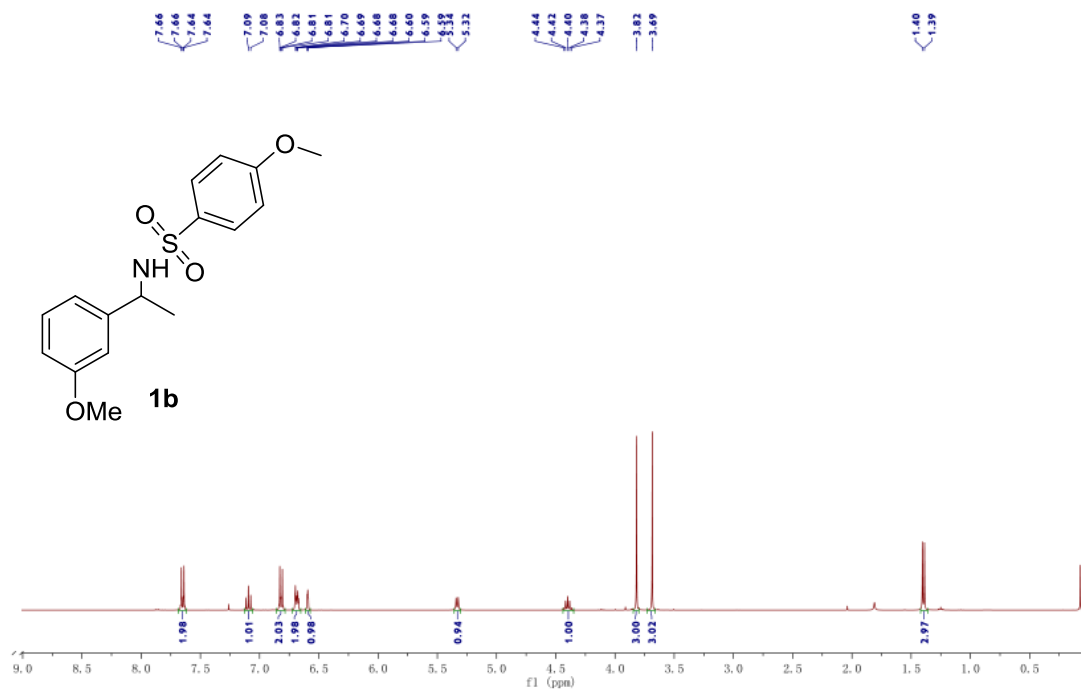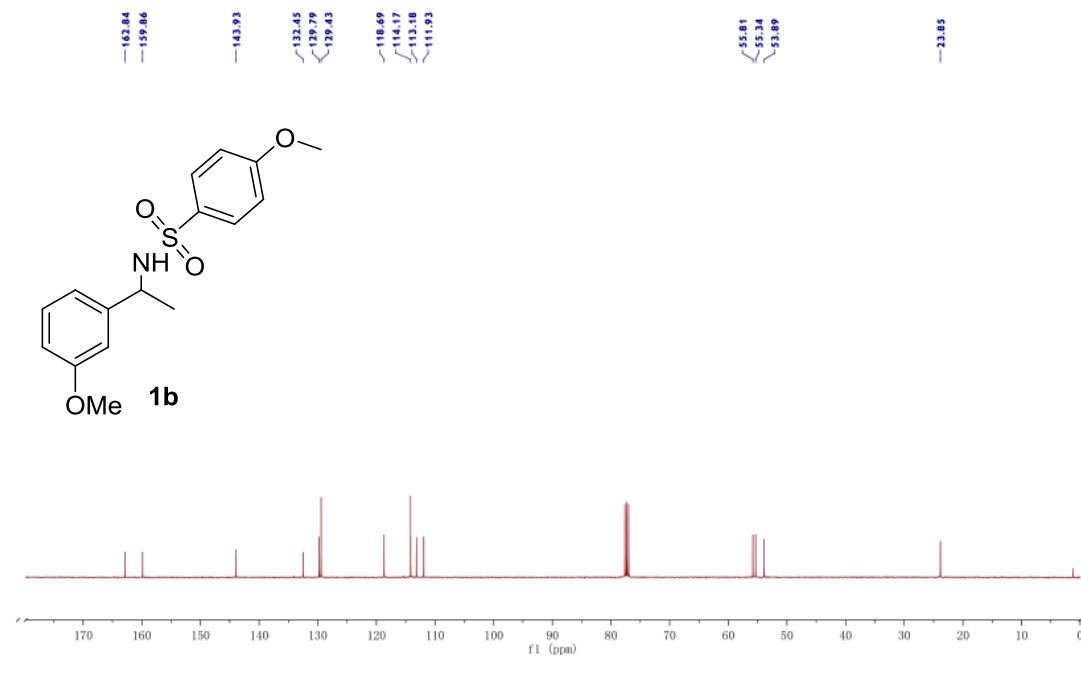

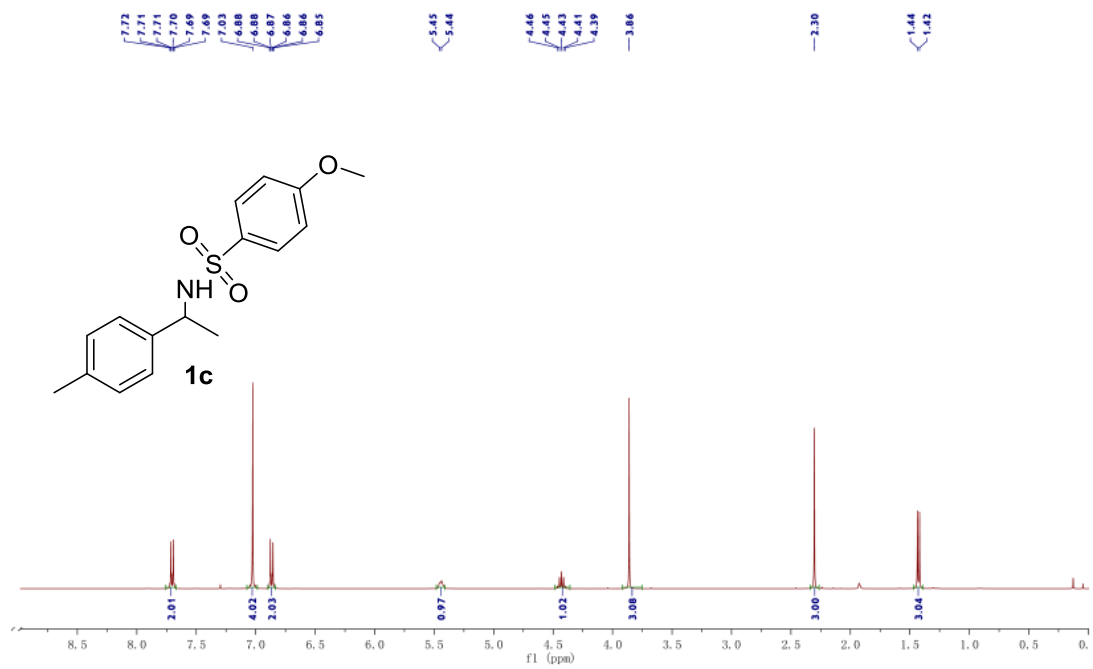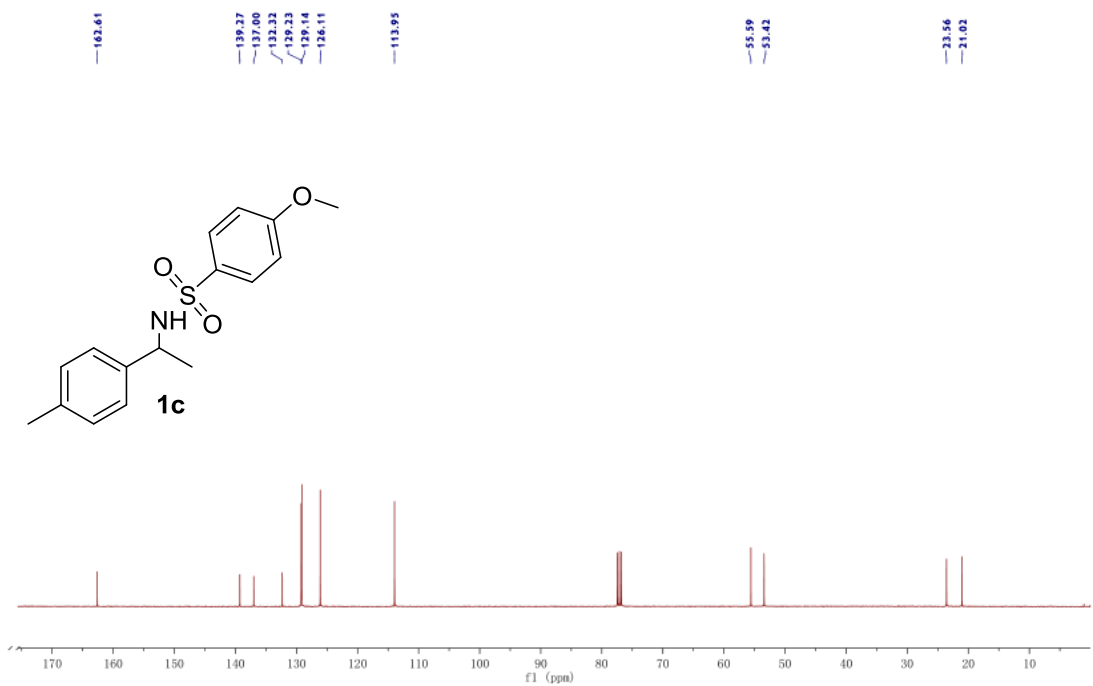

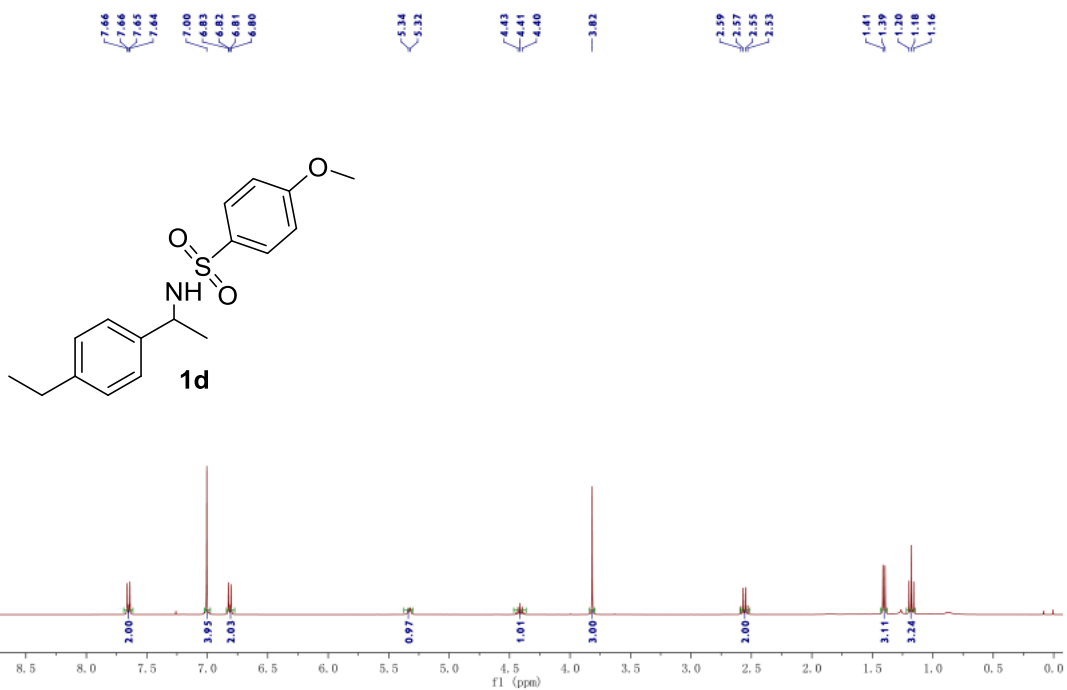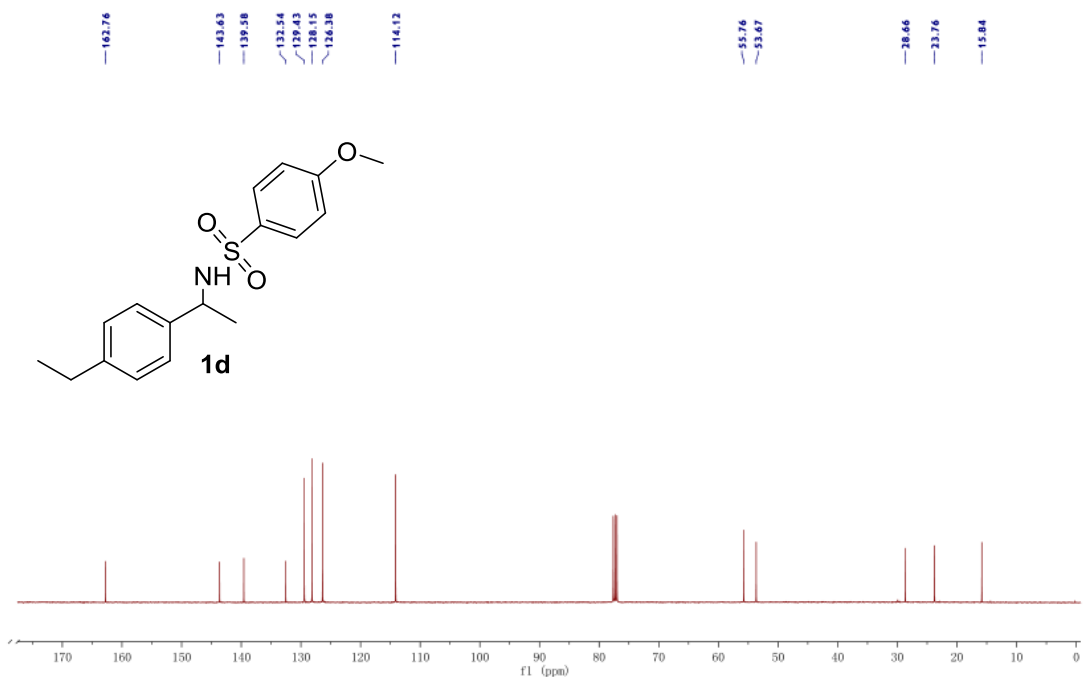



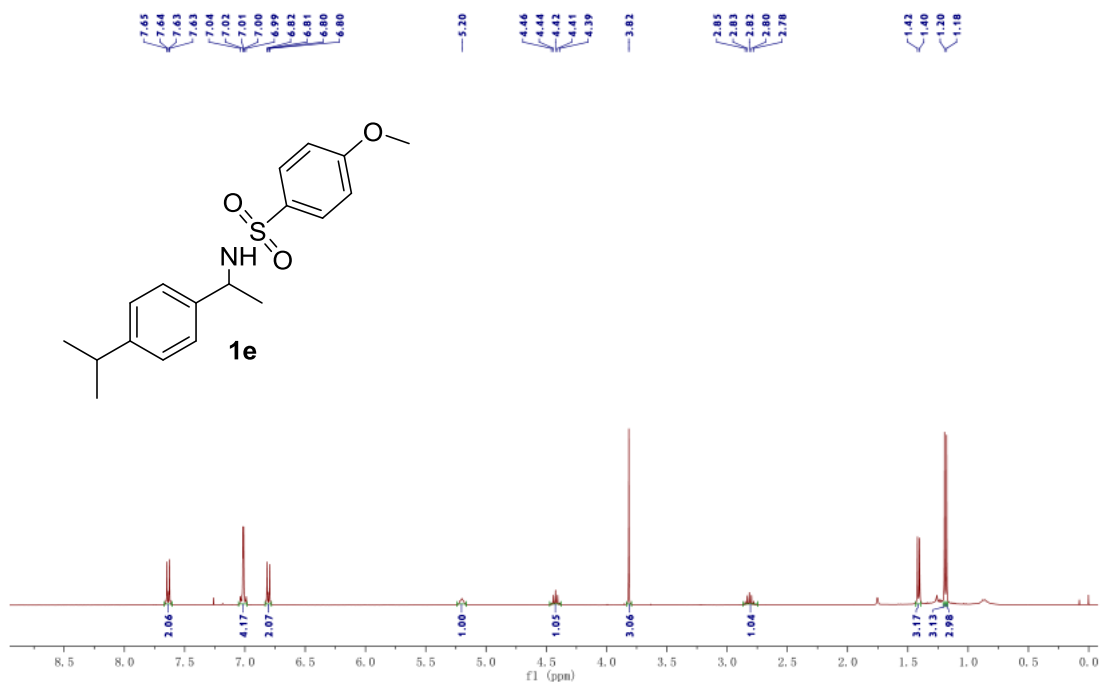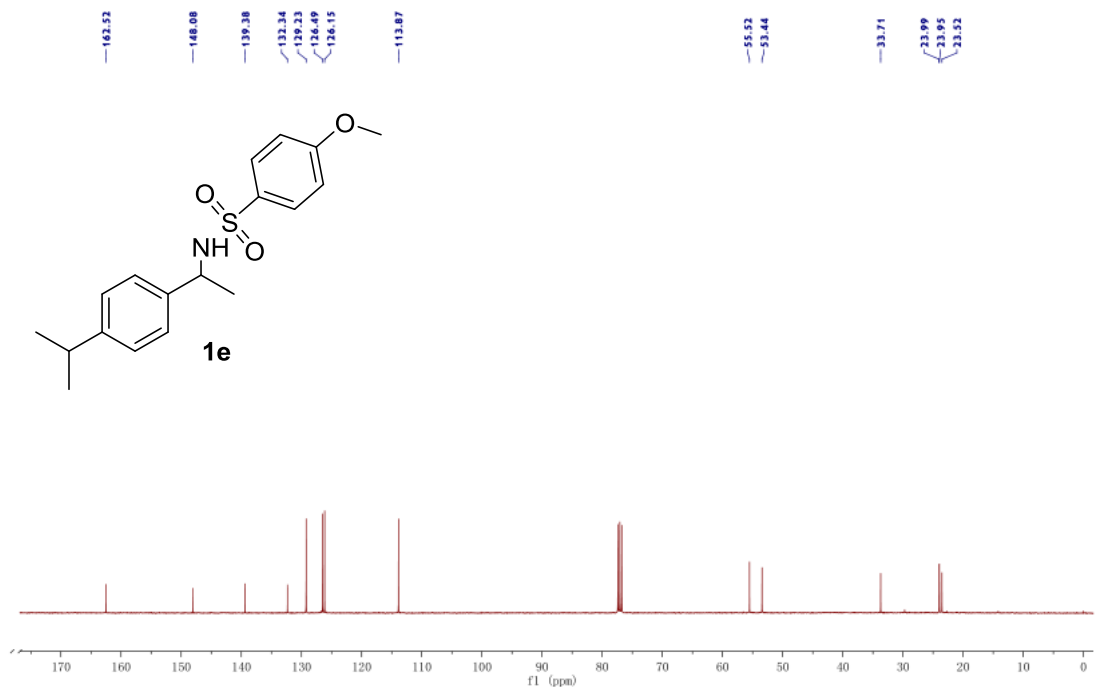

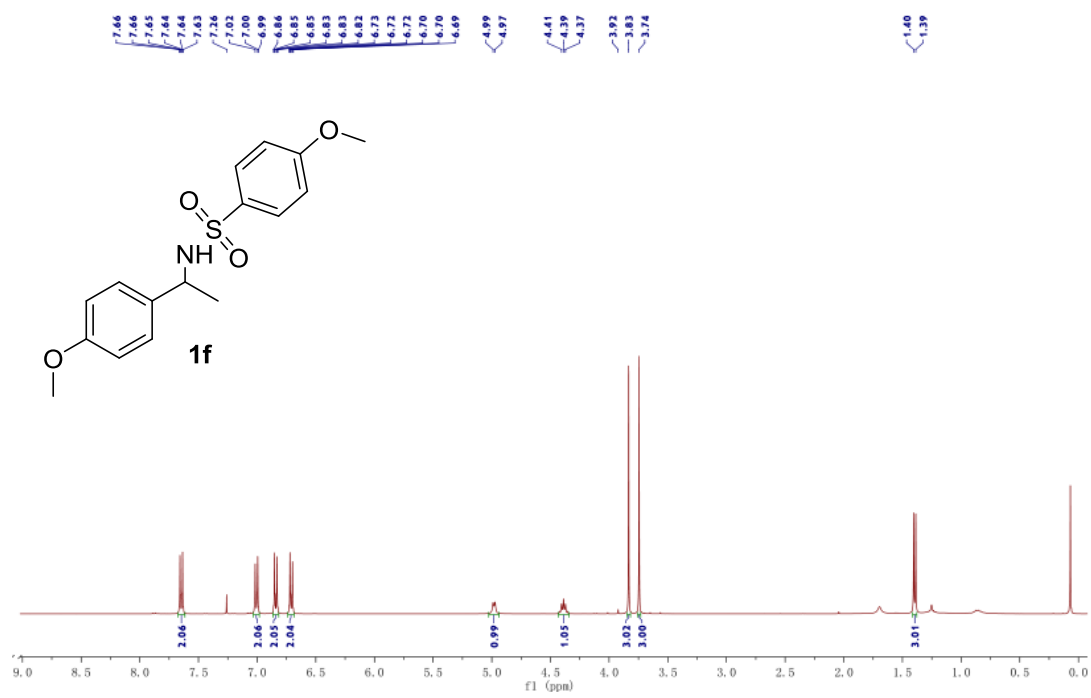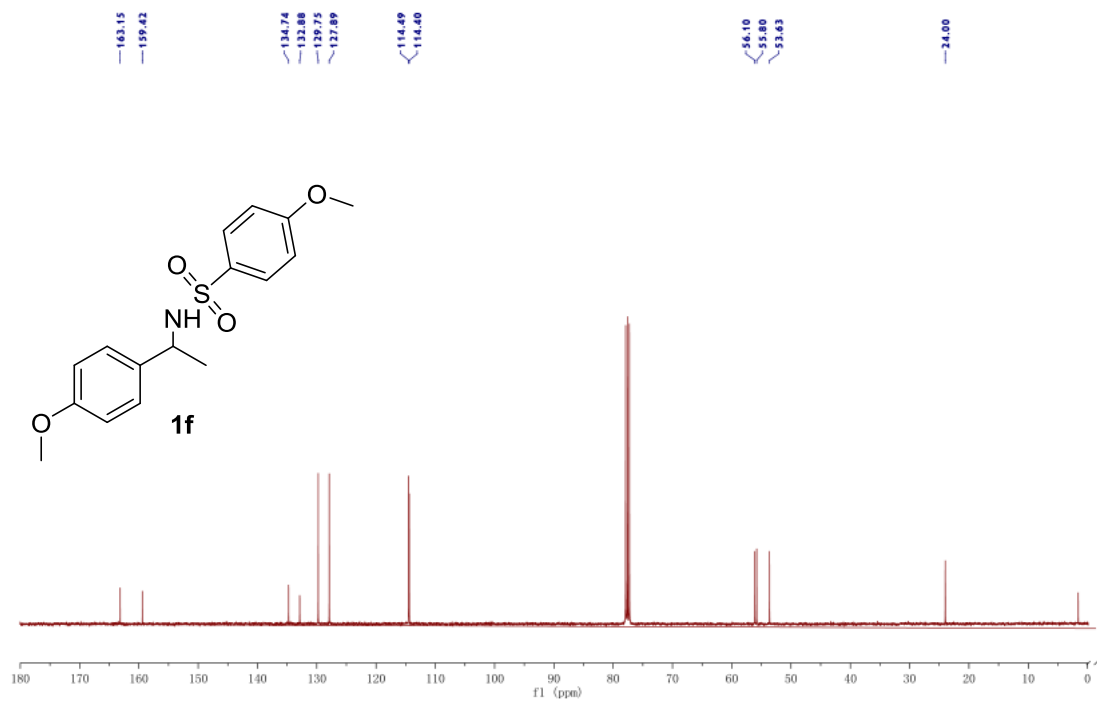

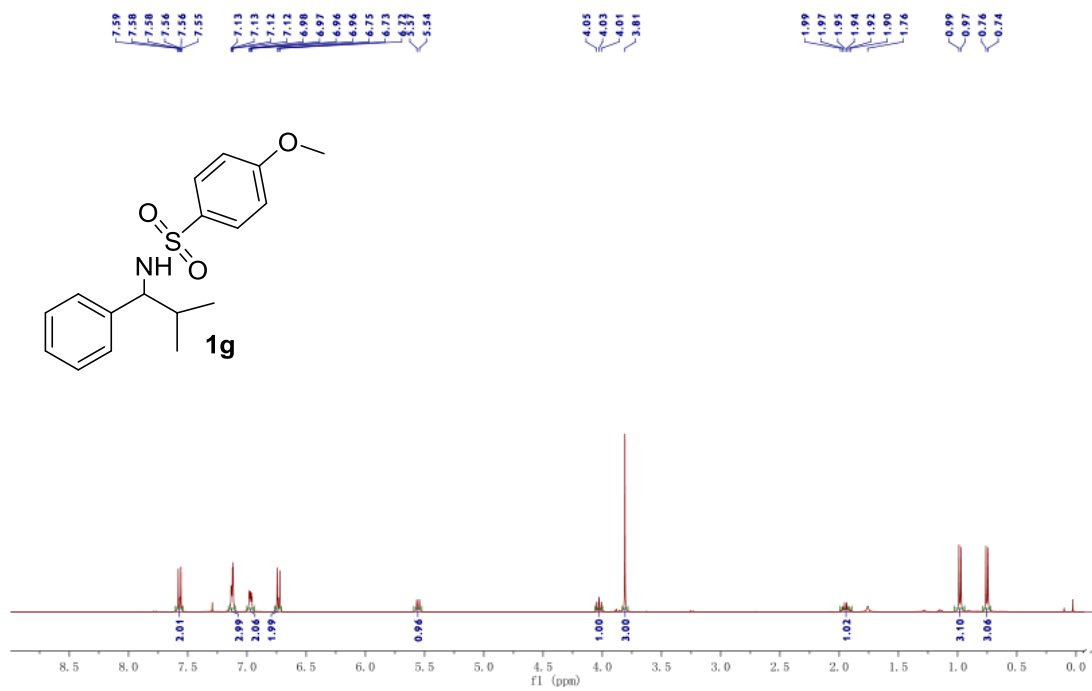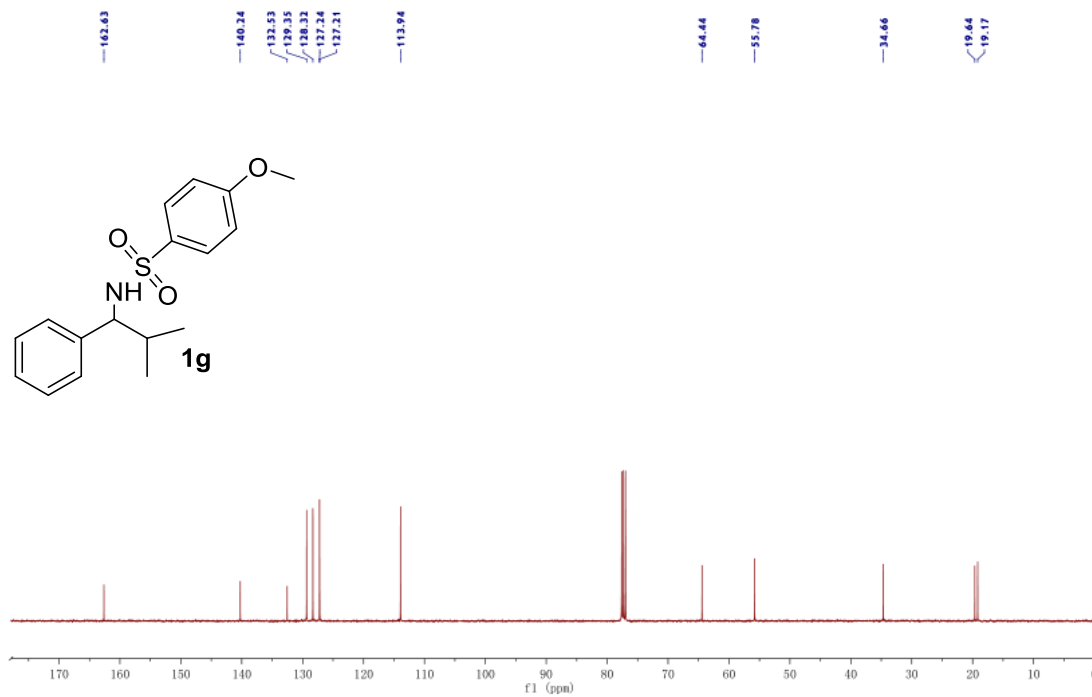

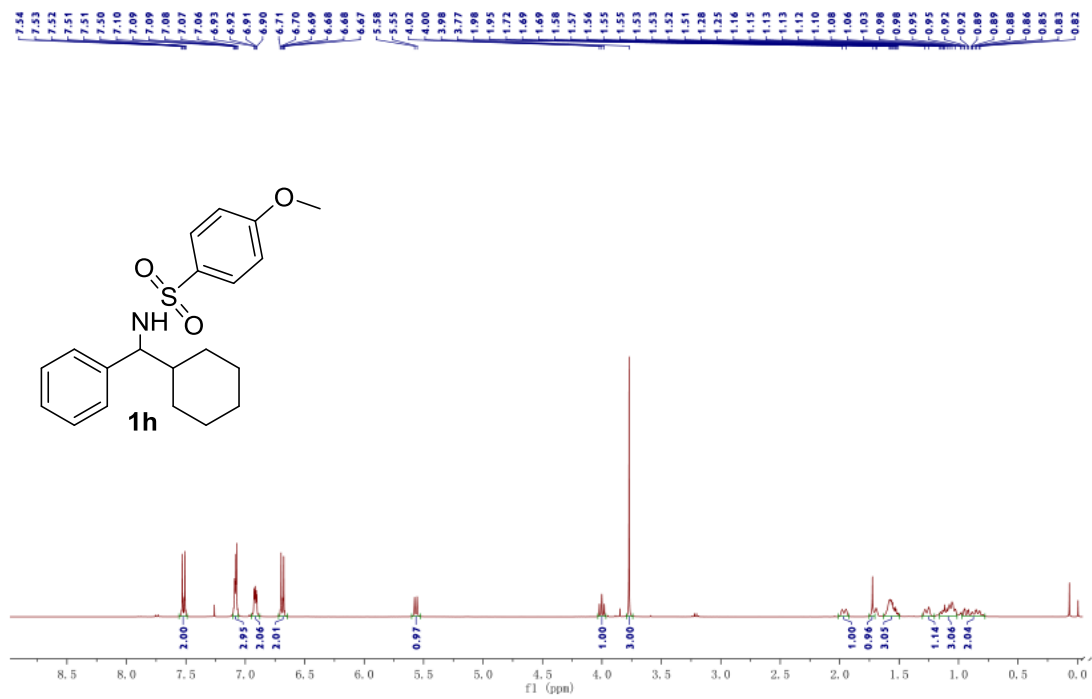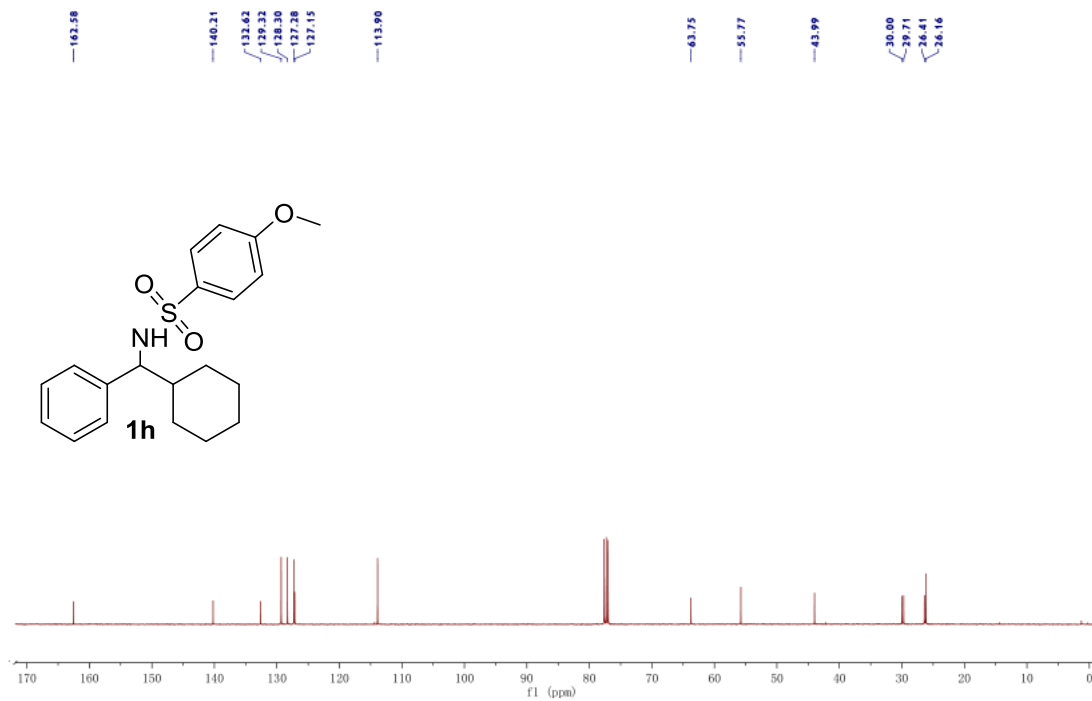

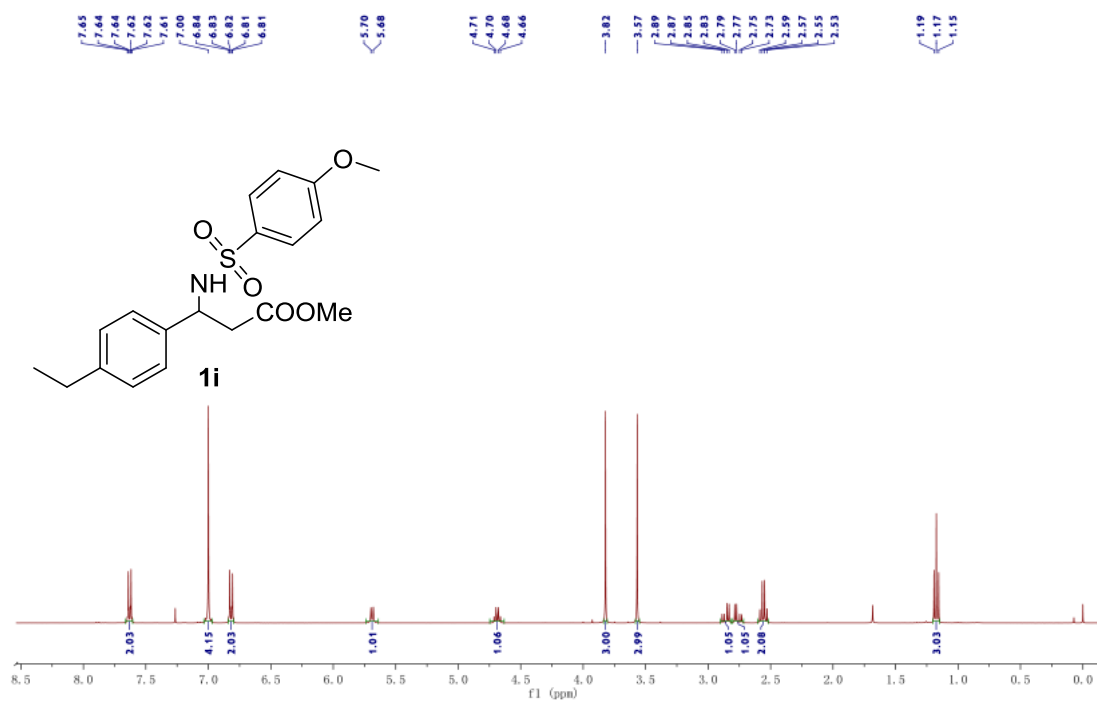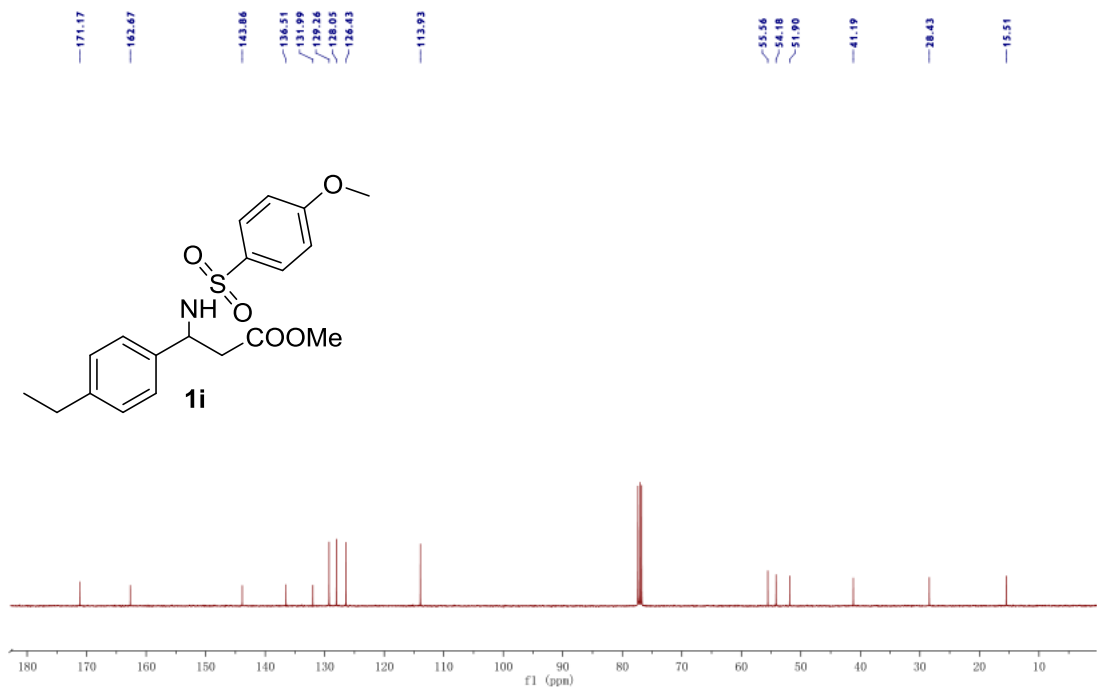

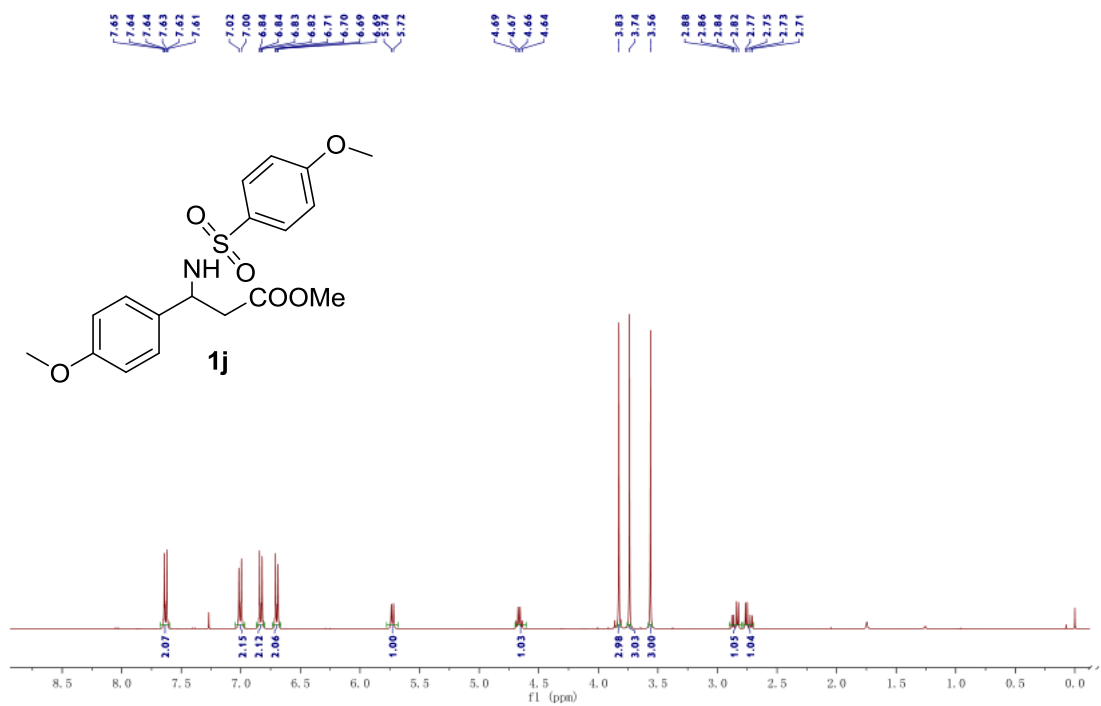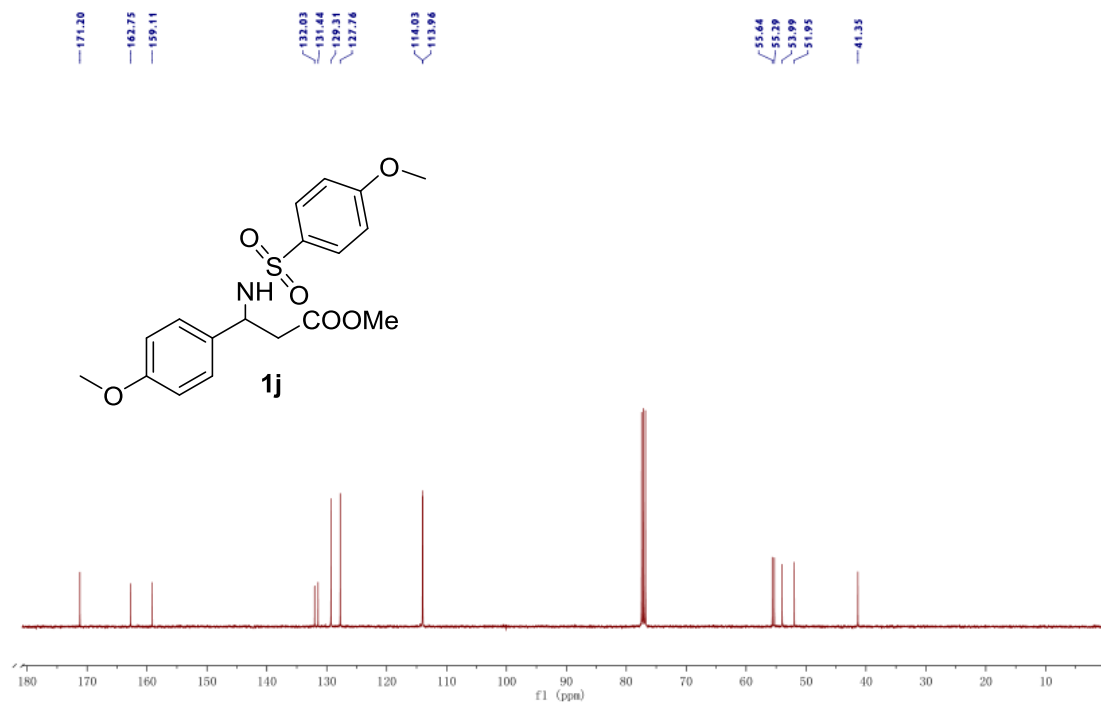

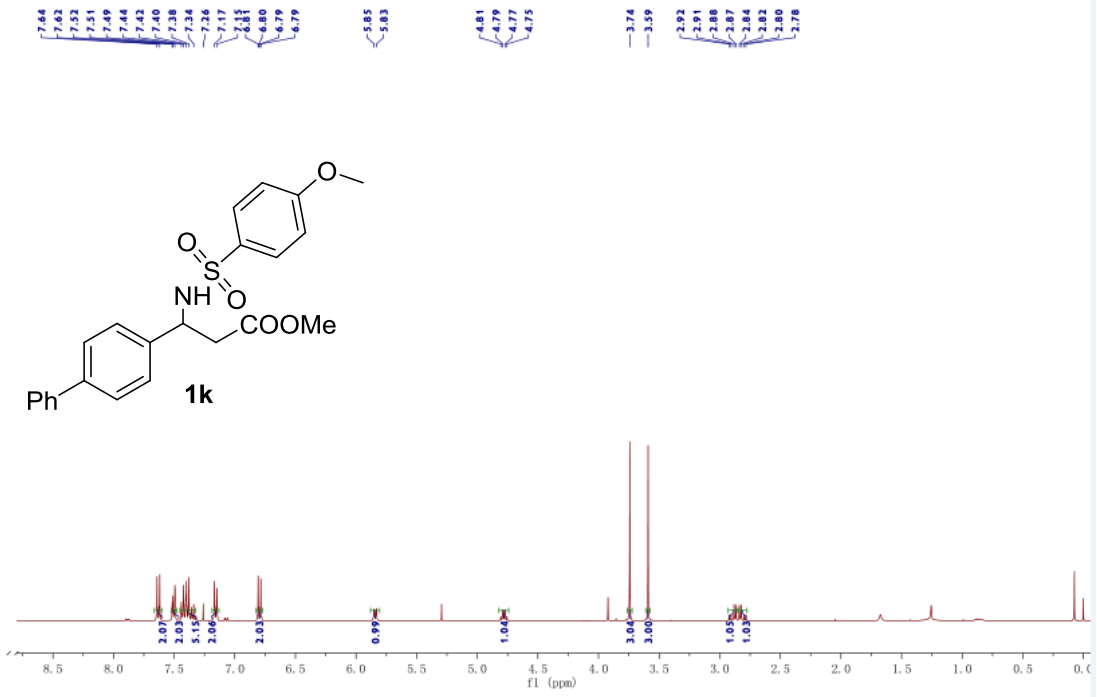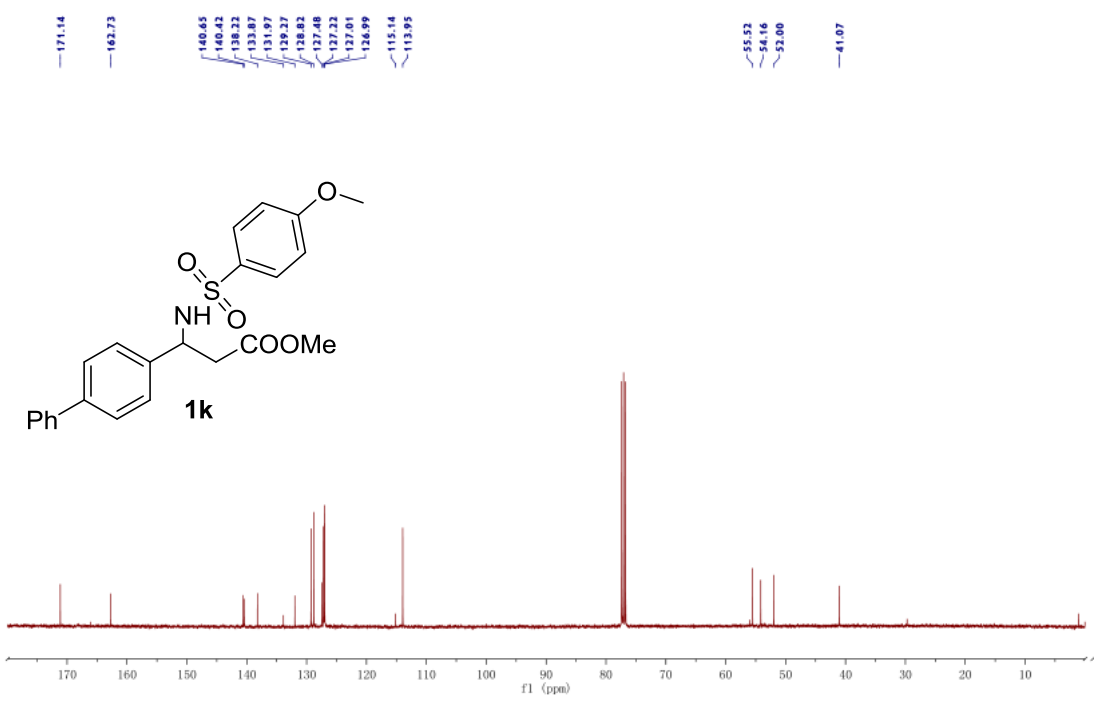

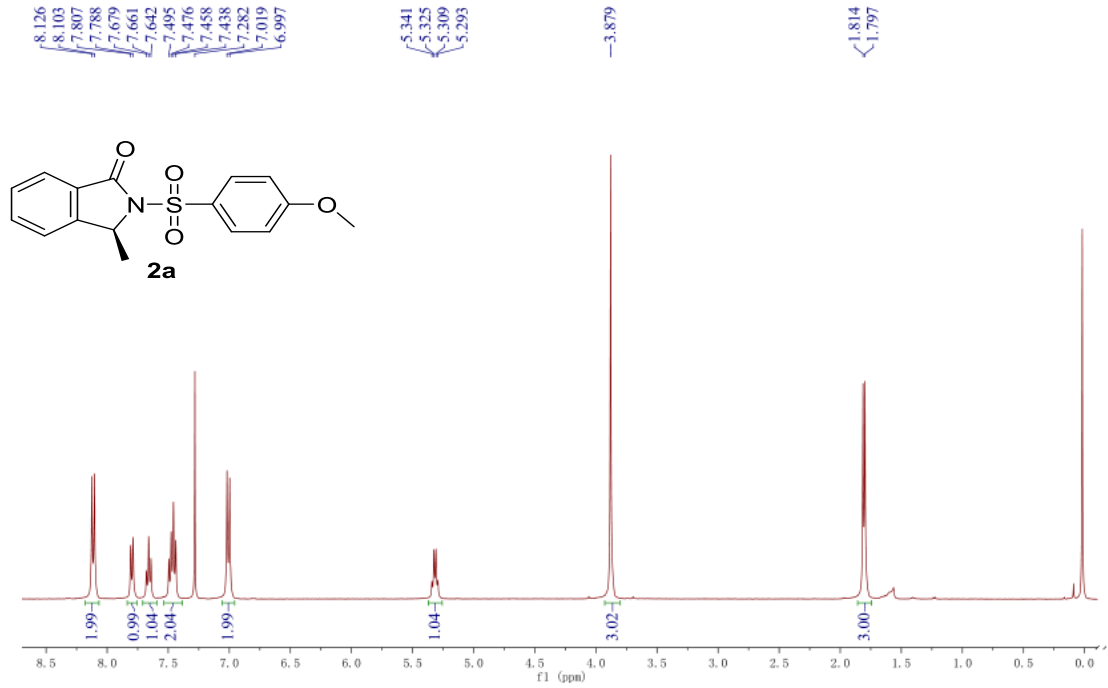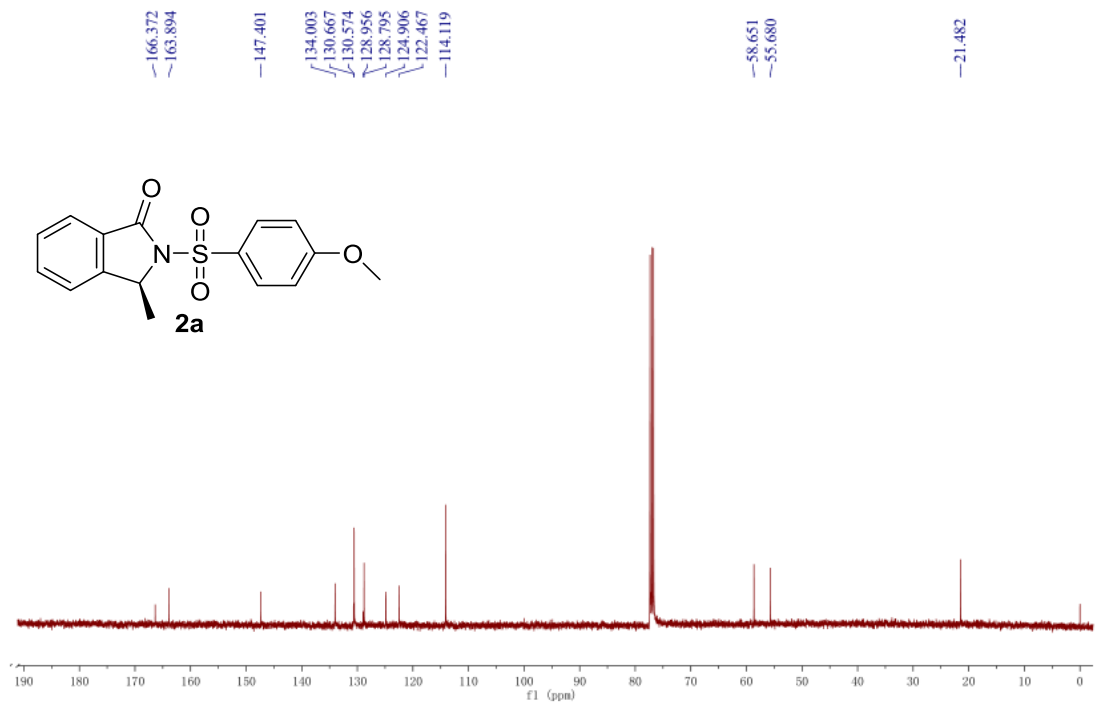



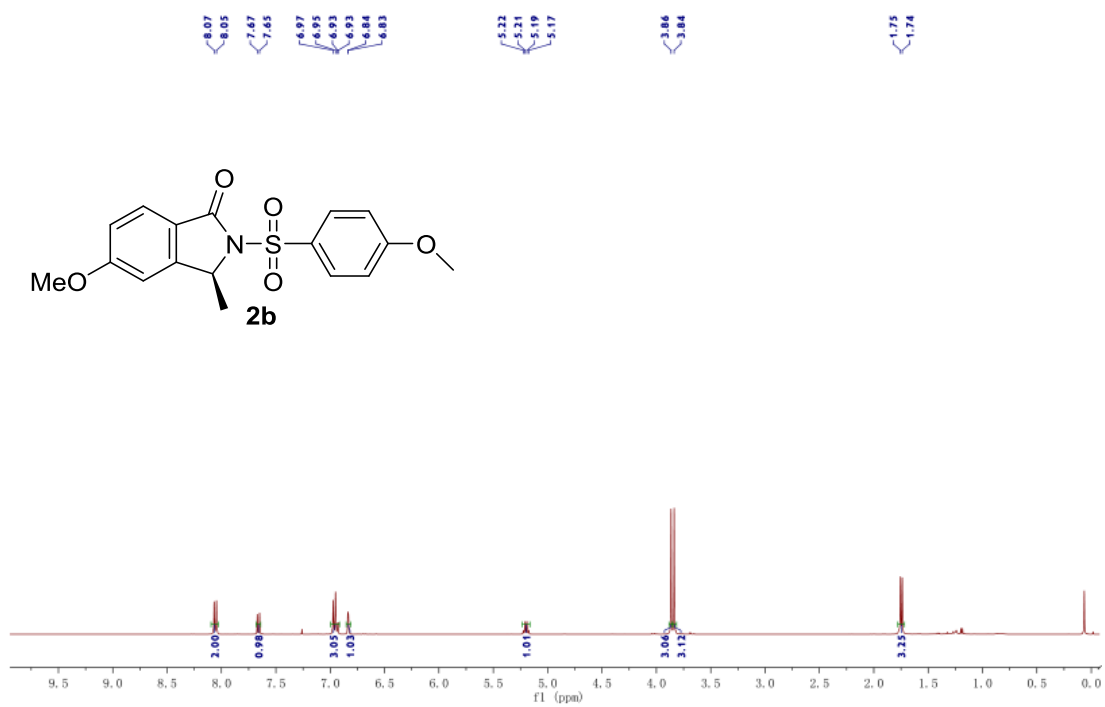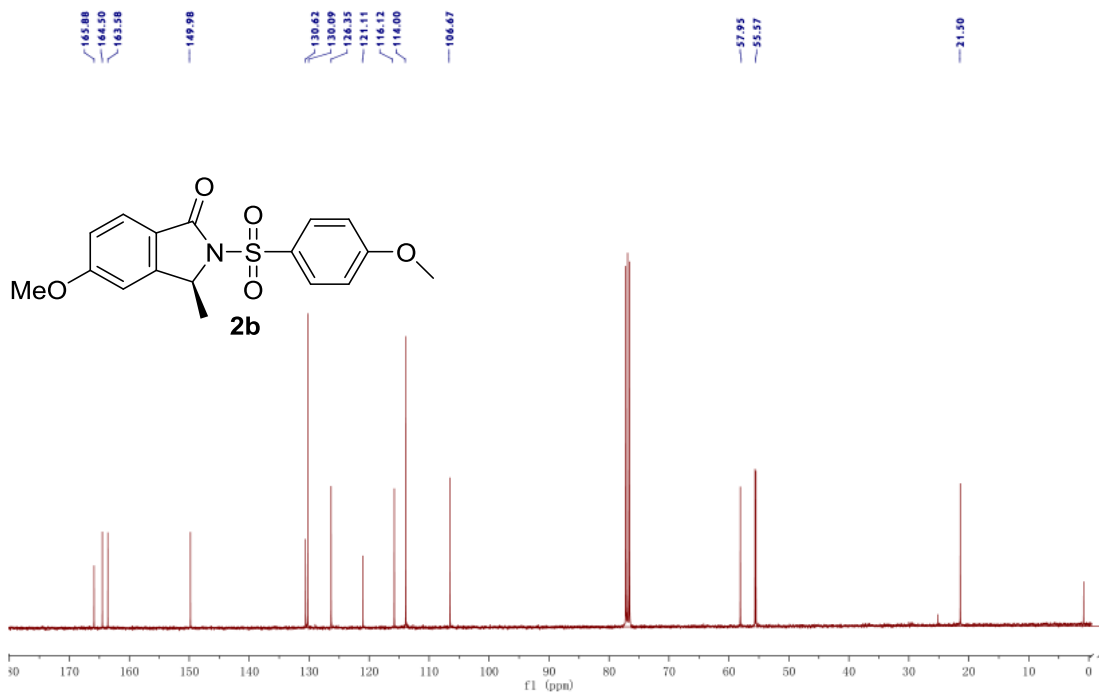

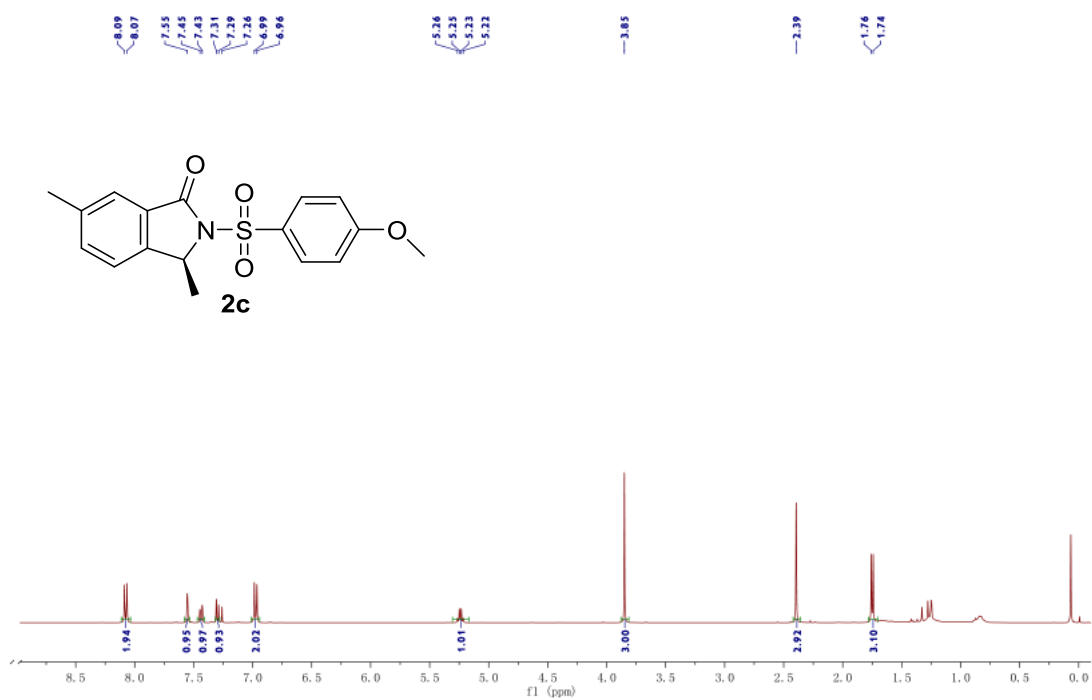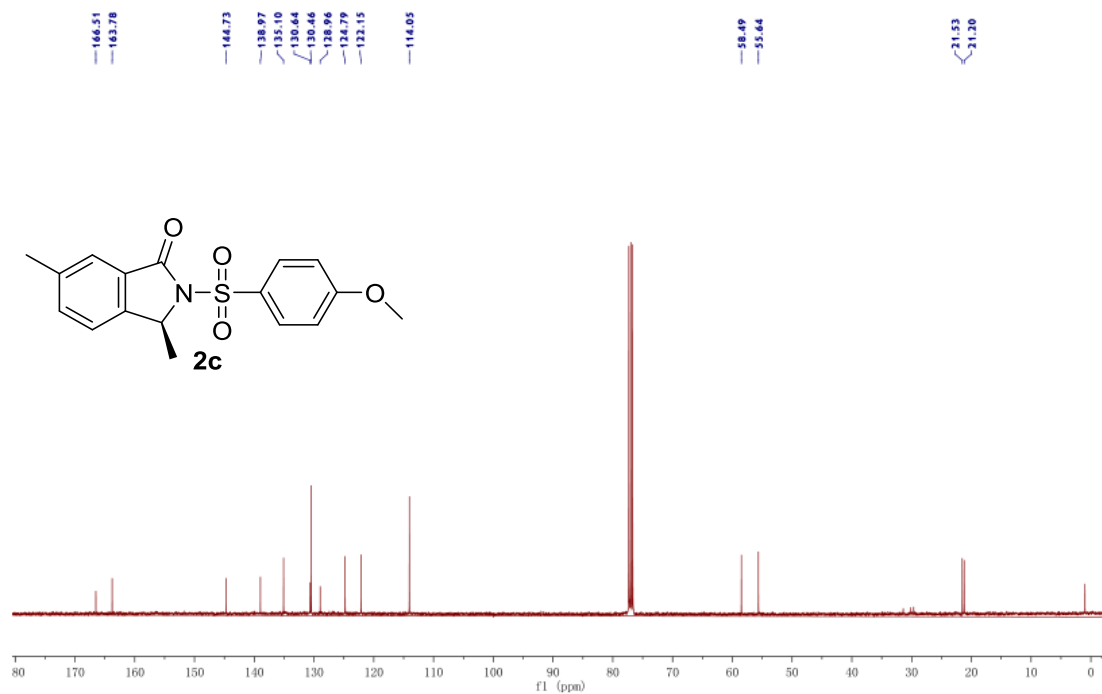

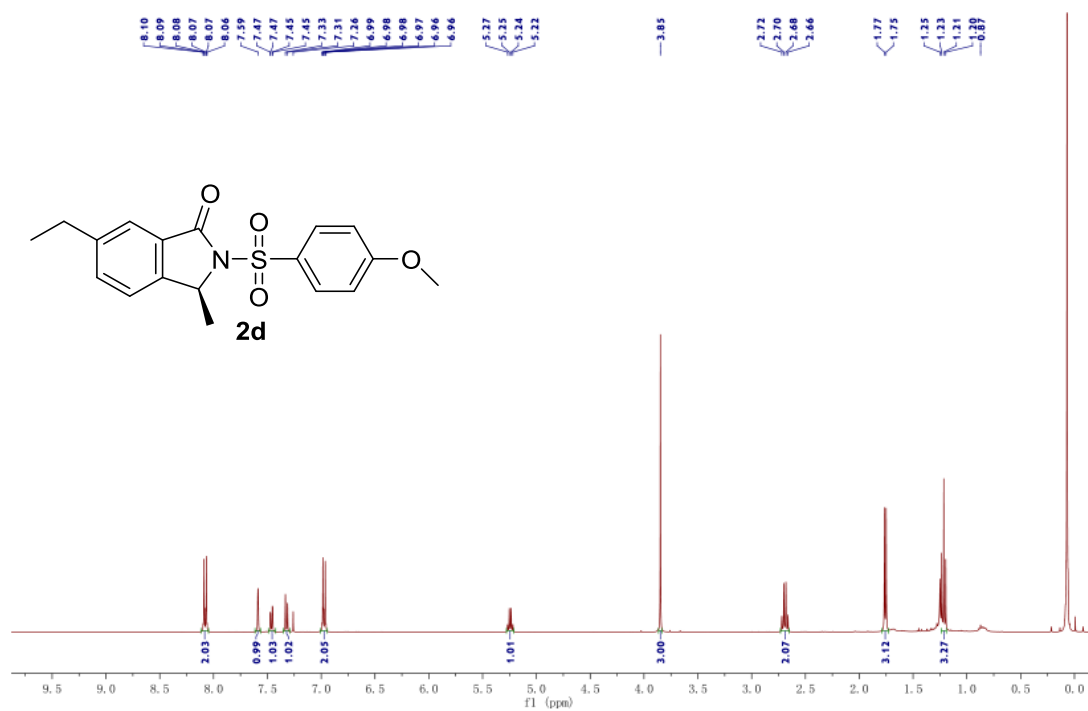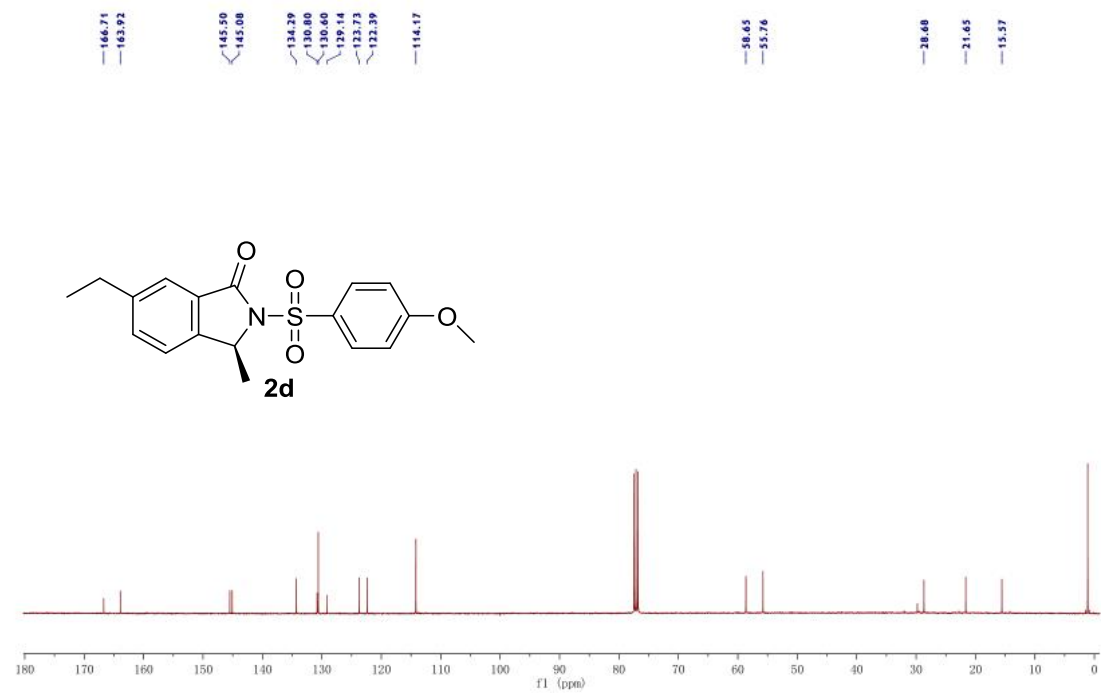

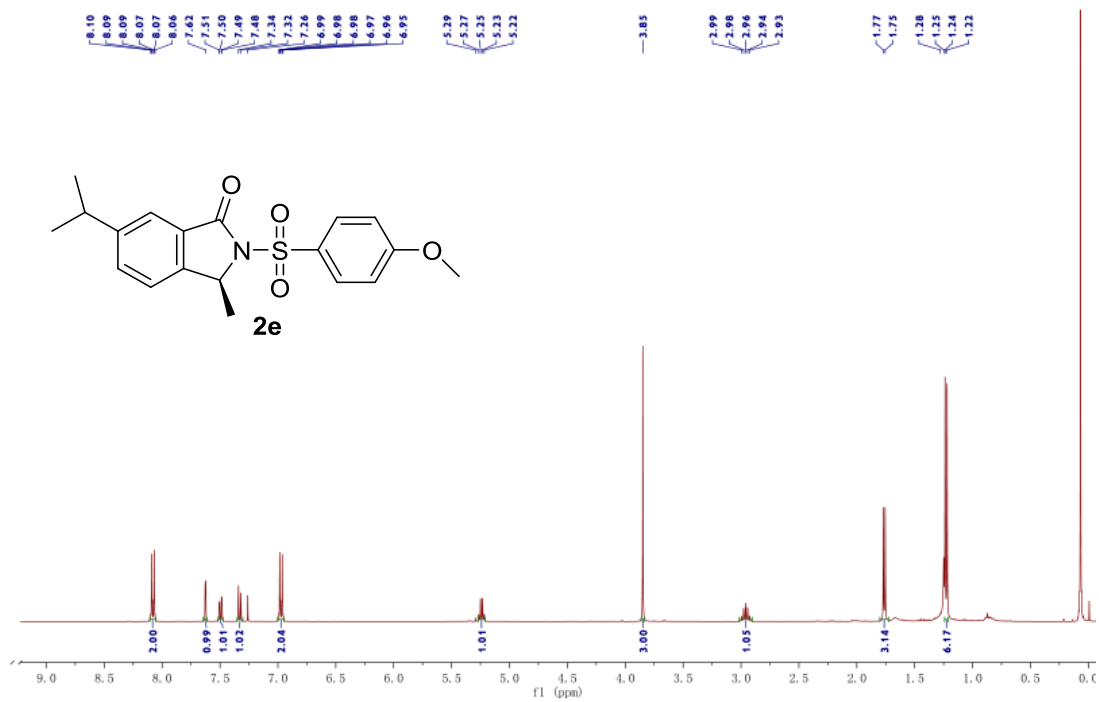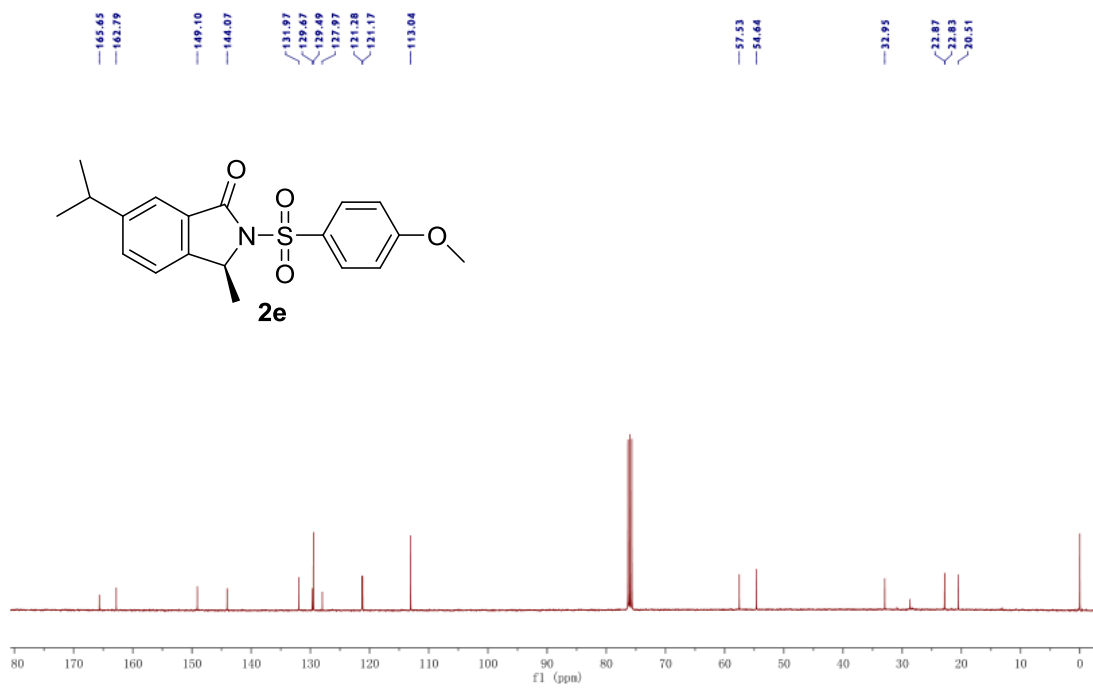

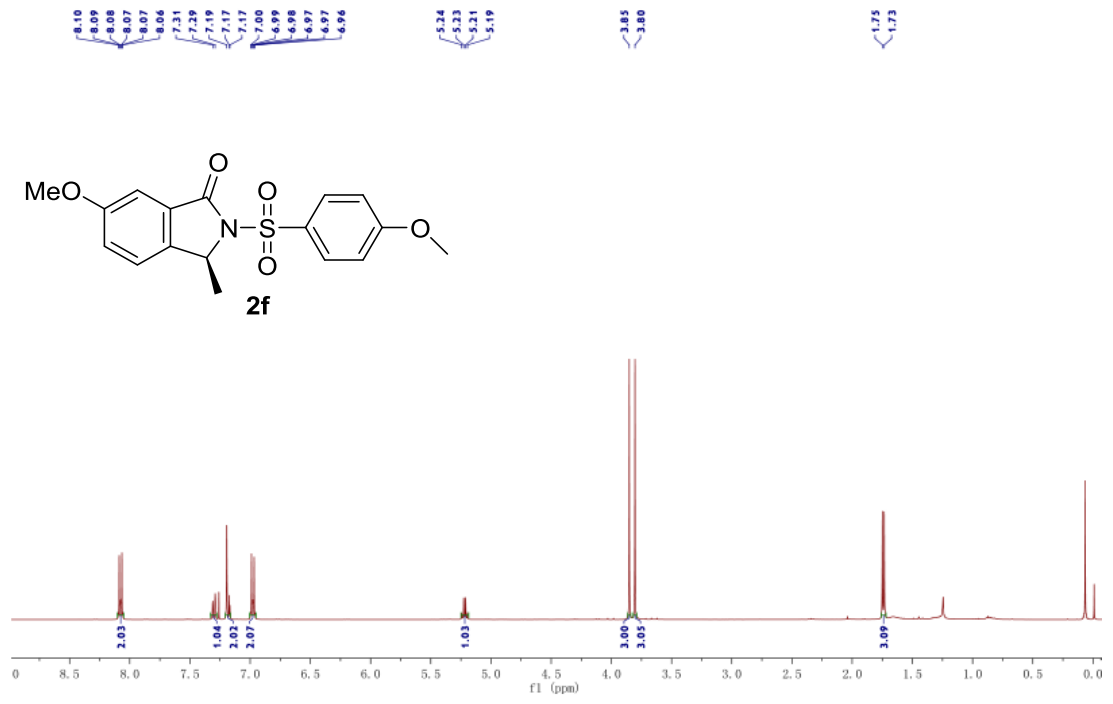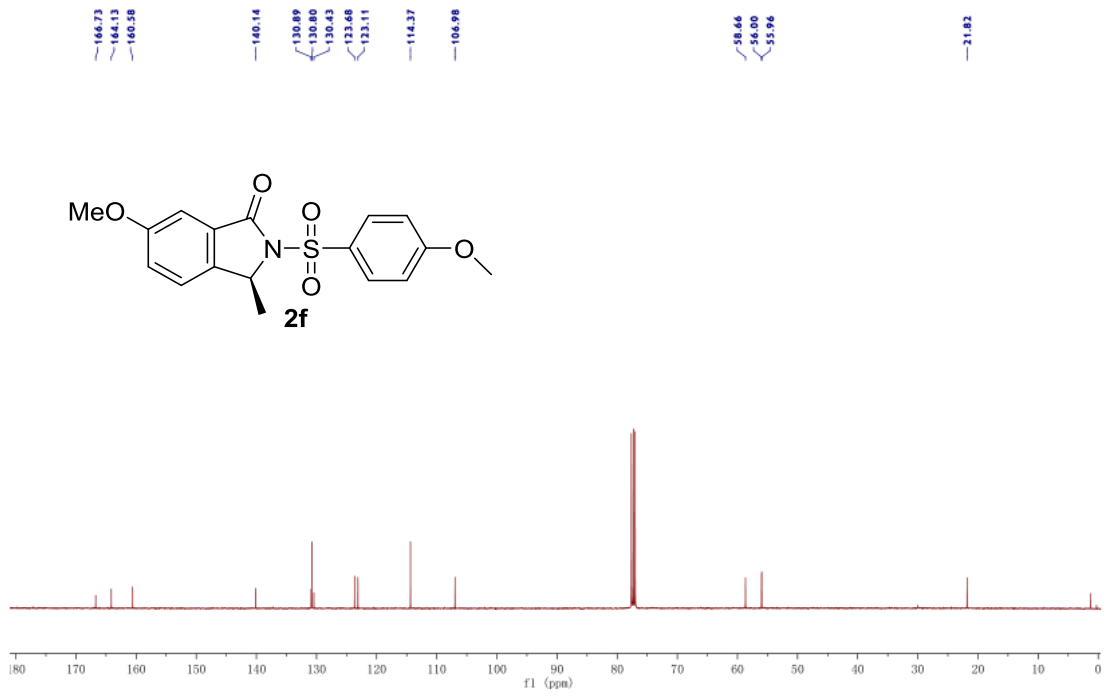

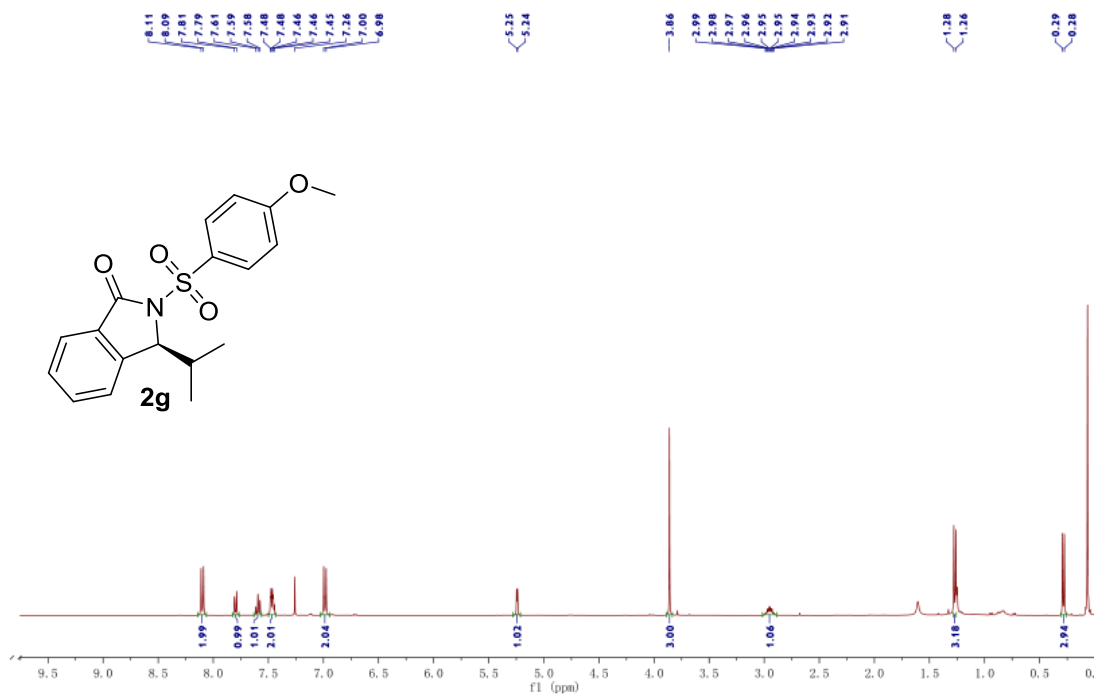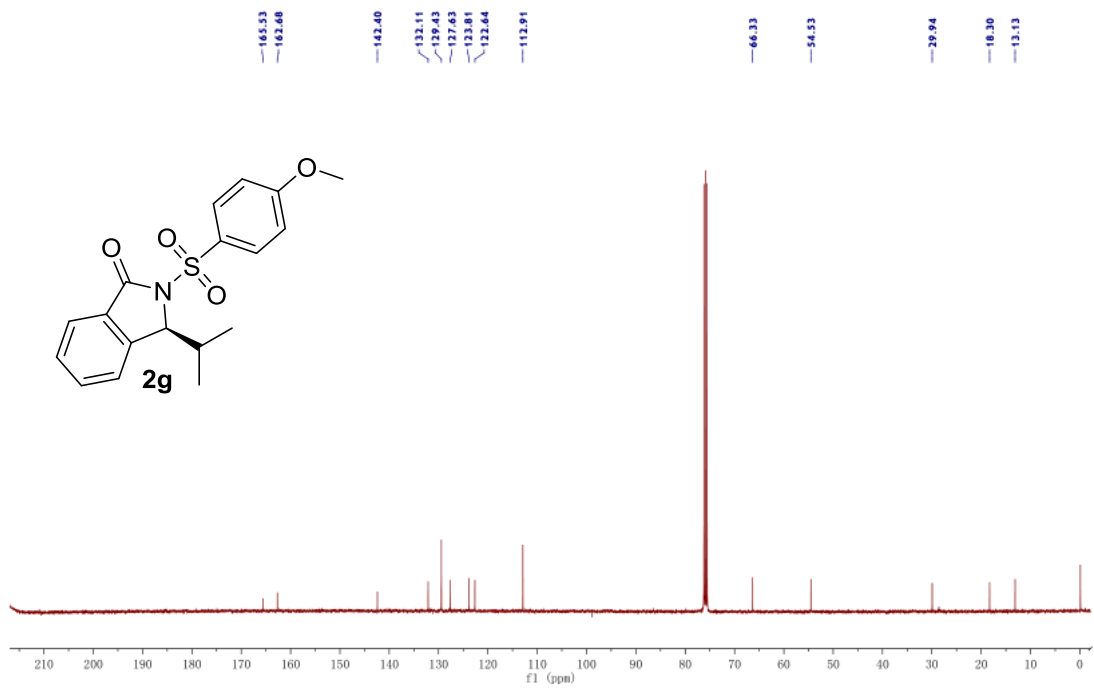

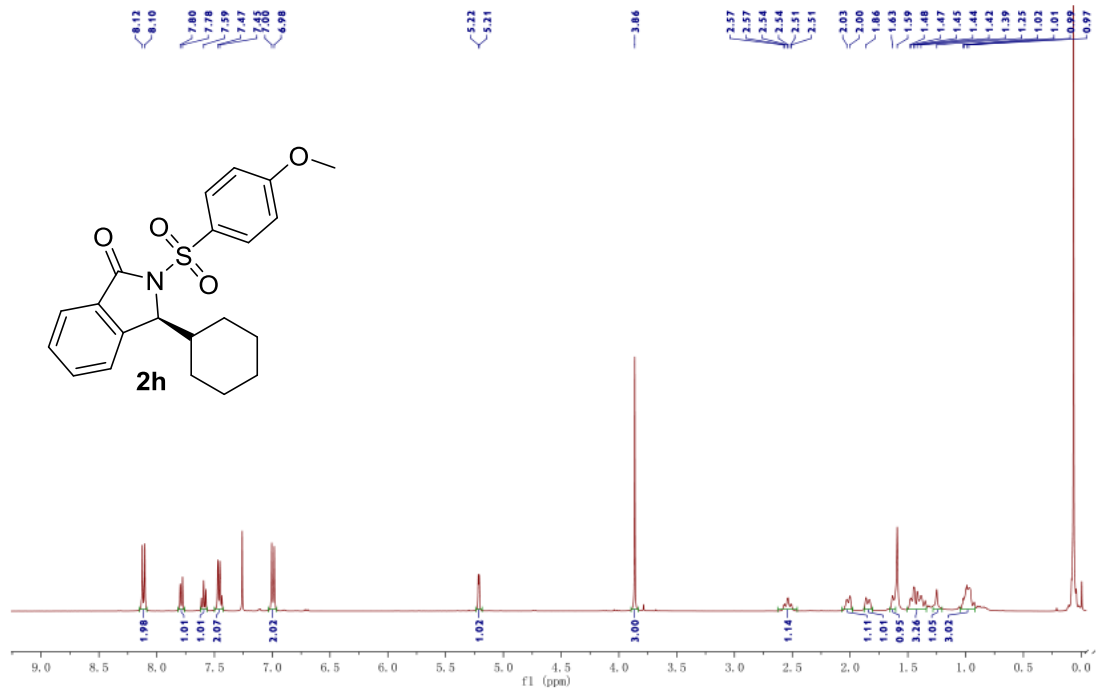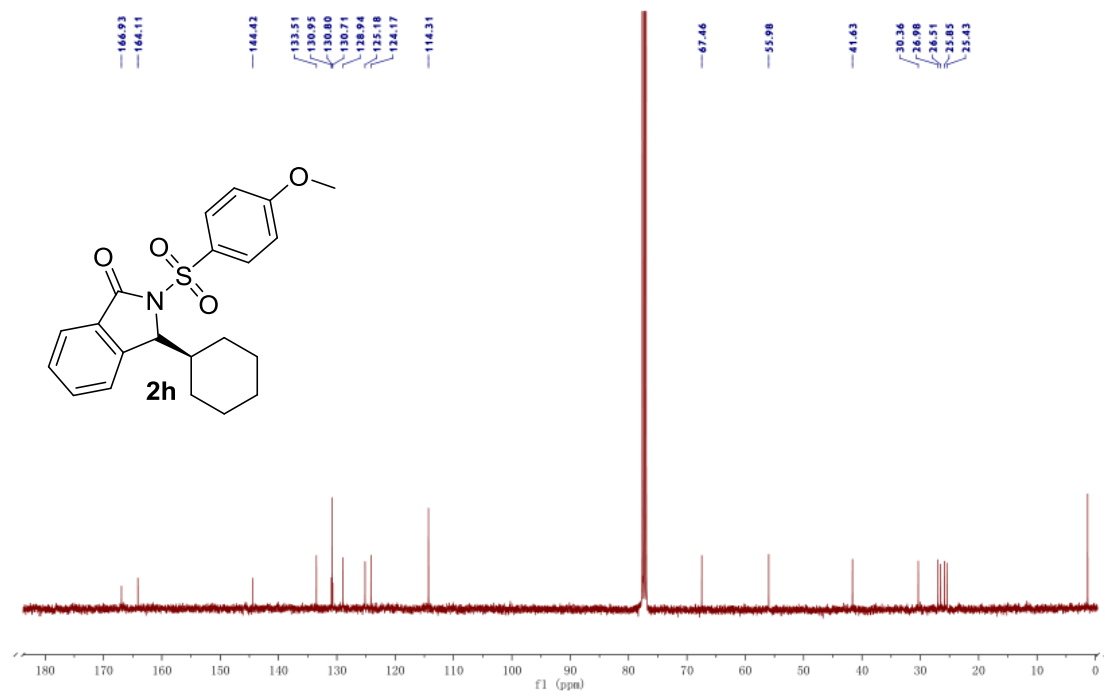

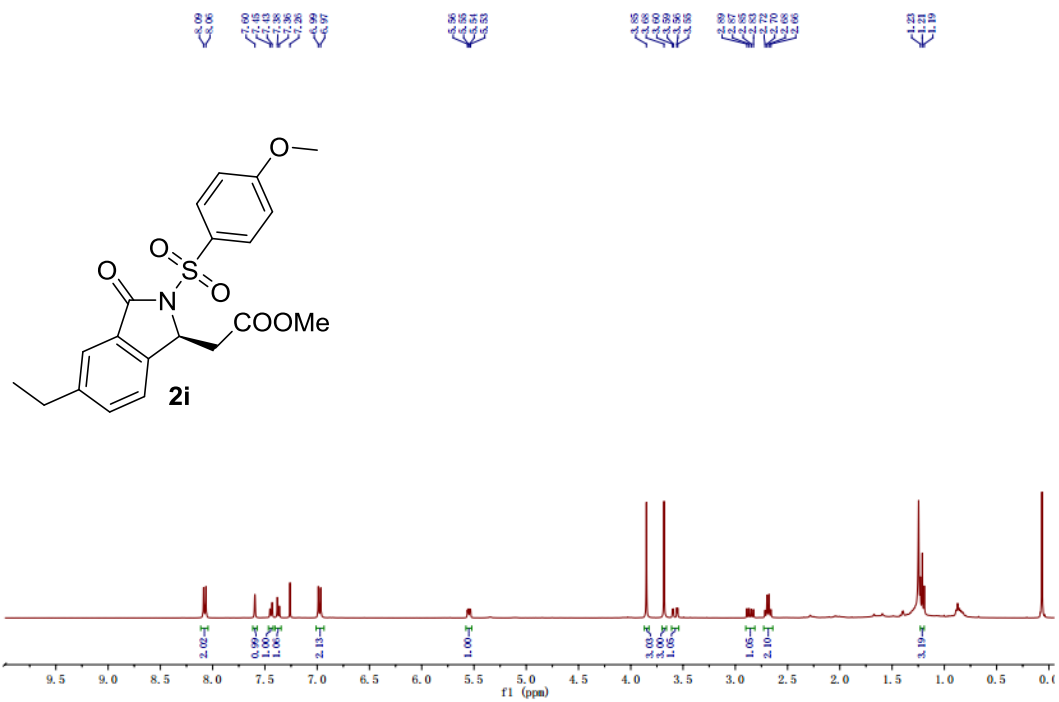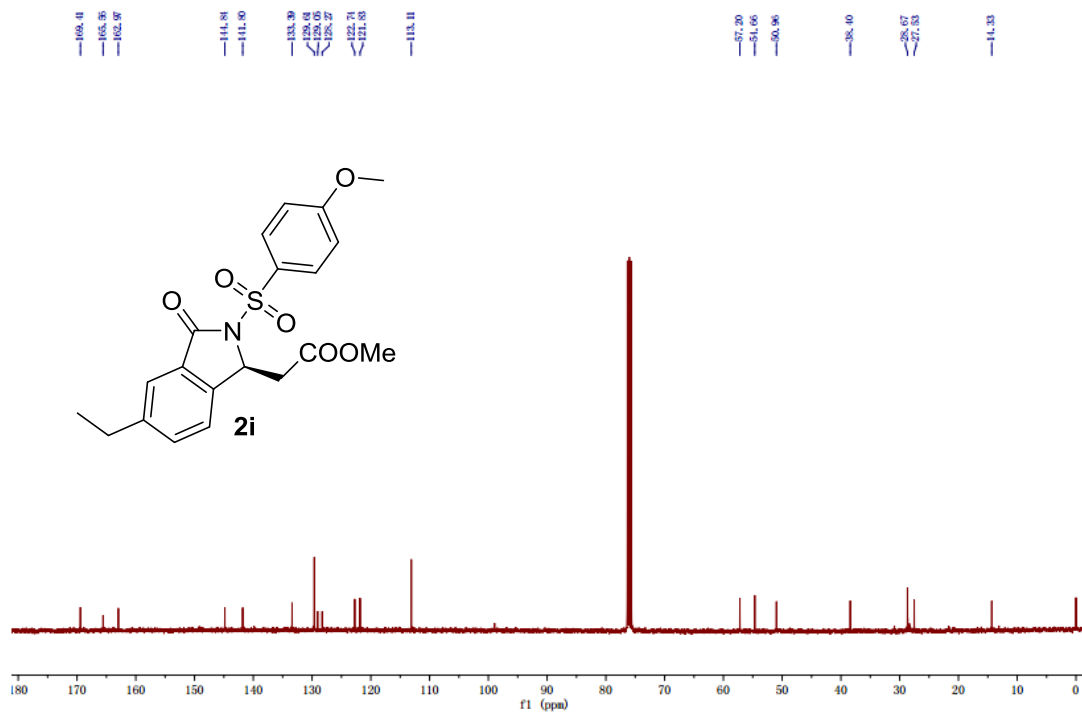



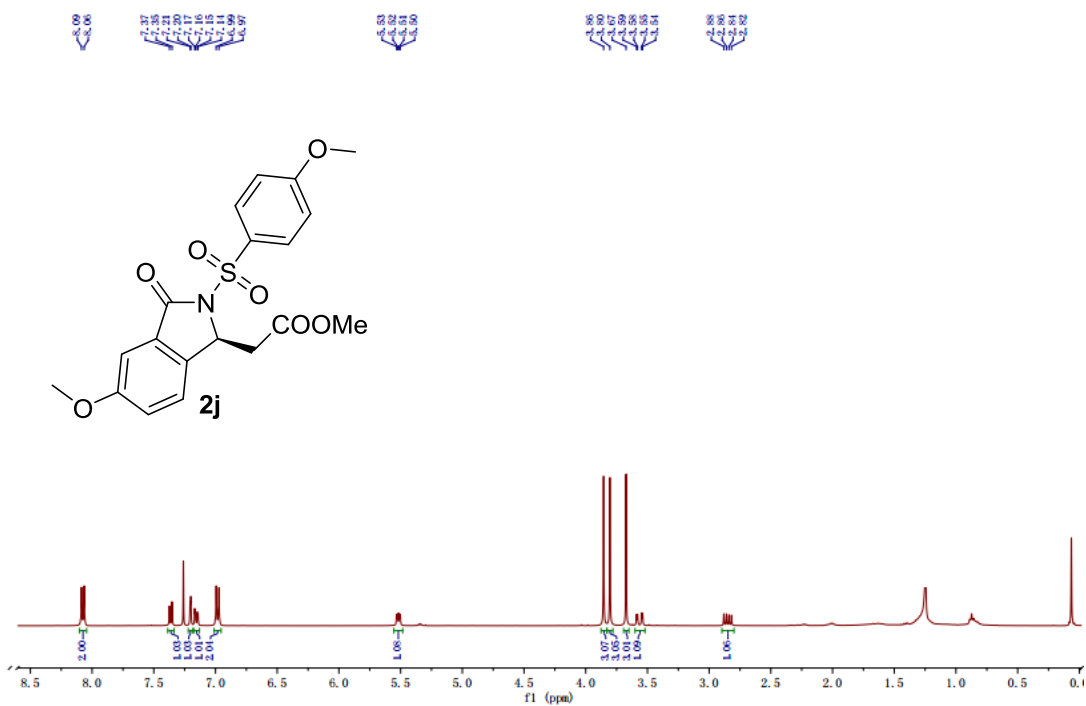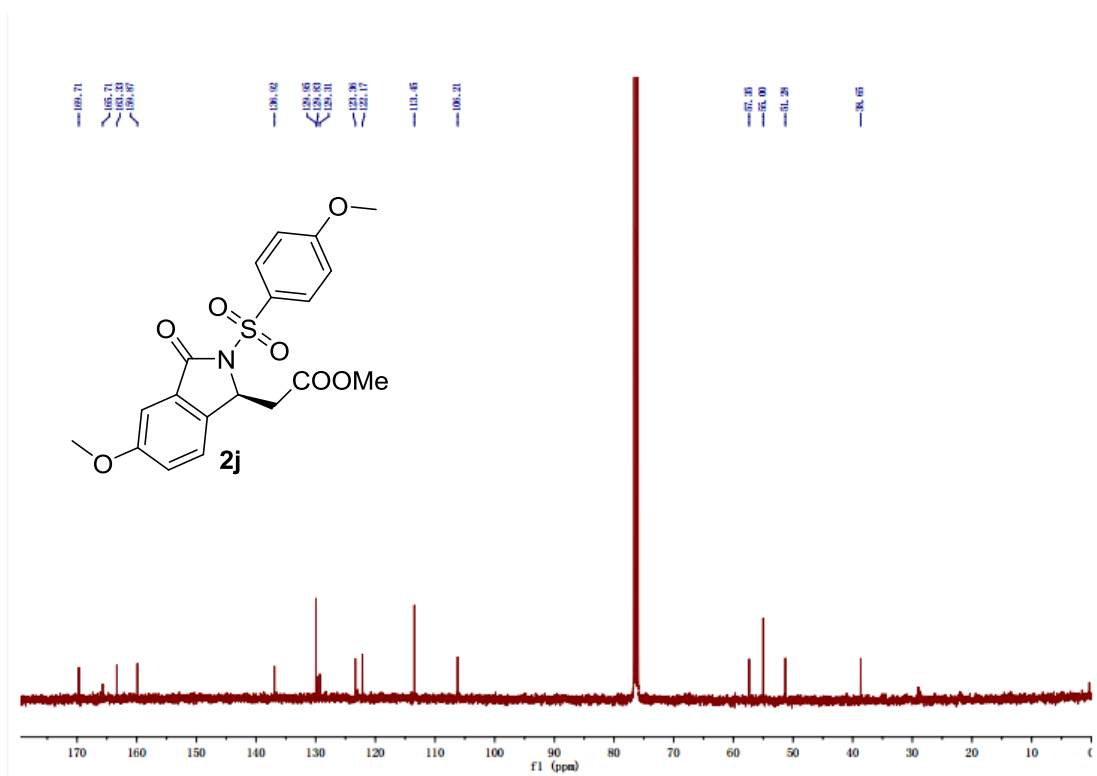

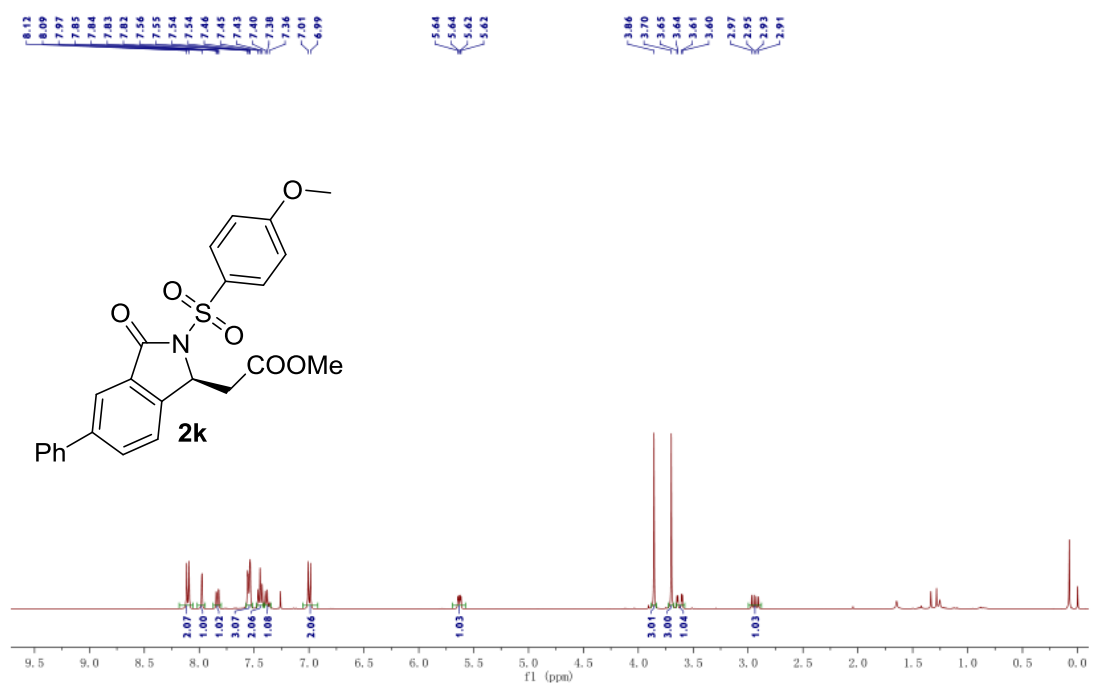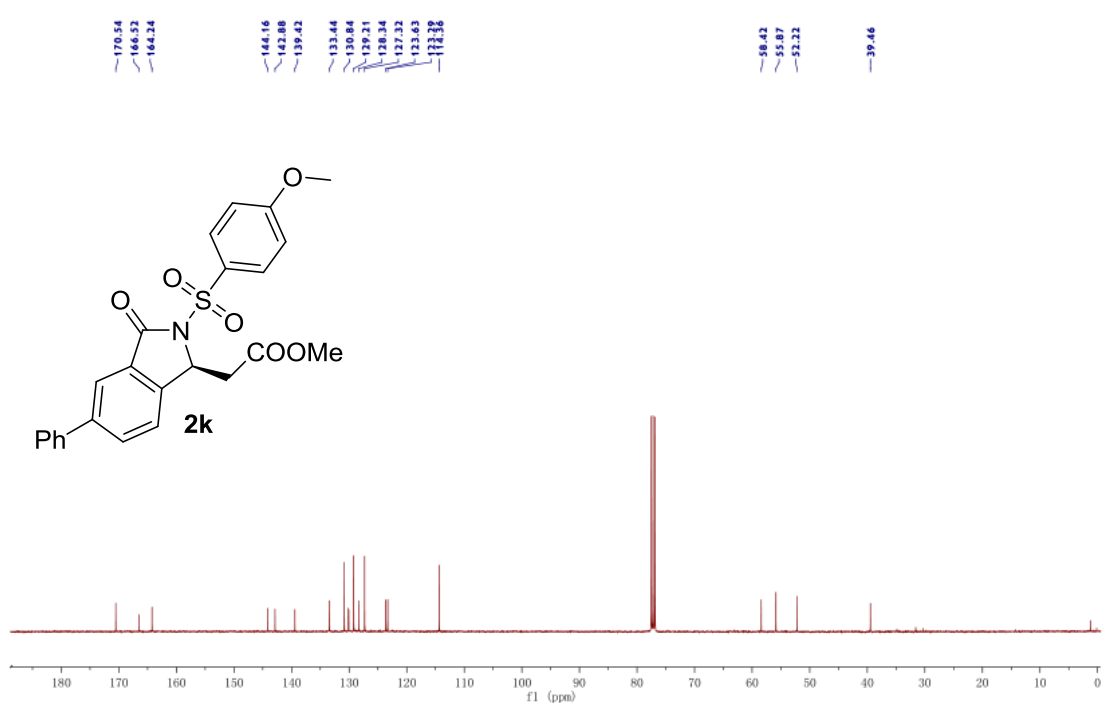

## 7. HPLC Chromatograms

### (*R*)-4-methoxy-*N*-(1-phenylethyl)benzenesulfonamide (1a')

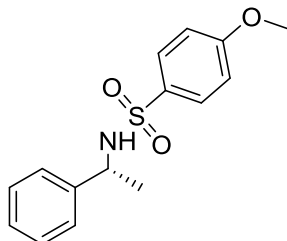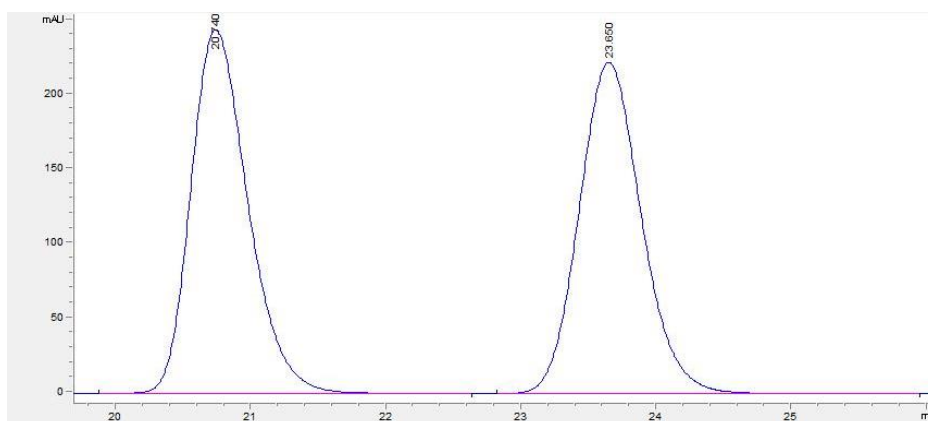

#### Area Percent Report

| Peak | RetTime [min] | Area [mAU*s] | Area % | Height [mAU] |
|------|---------------|--------------|--------|--------------|
| 1    | 20.74         | 7175.6       | 50.138 | 244.3        |
| 2    | 23.65         | 7136         | 49.862 | 222.3        |

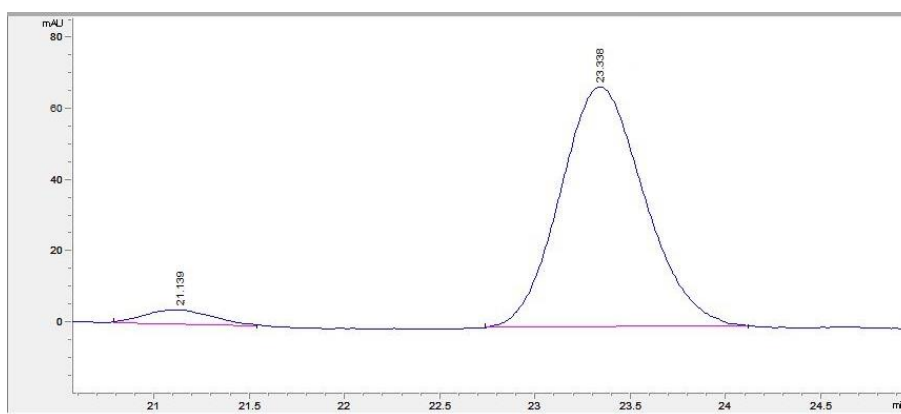

#### Area Percent Report

| Peak | RetTime [min] | Area [mAU*s] | Area % | Height [mAU] |
|------|---------------|--------------|--------|--------------|
| 1    | 21.139        | 102.7        | 4.690  | 4.1          |
| 2    | 23.338        | 2087.7       | 95.310 | 67.6         |

**(S)-2-((4-methoxyphenyl)sulfonyl)-3-methylisoindolin-1-one (2a)**

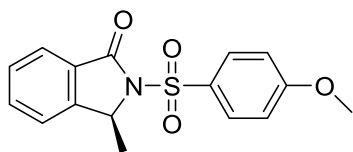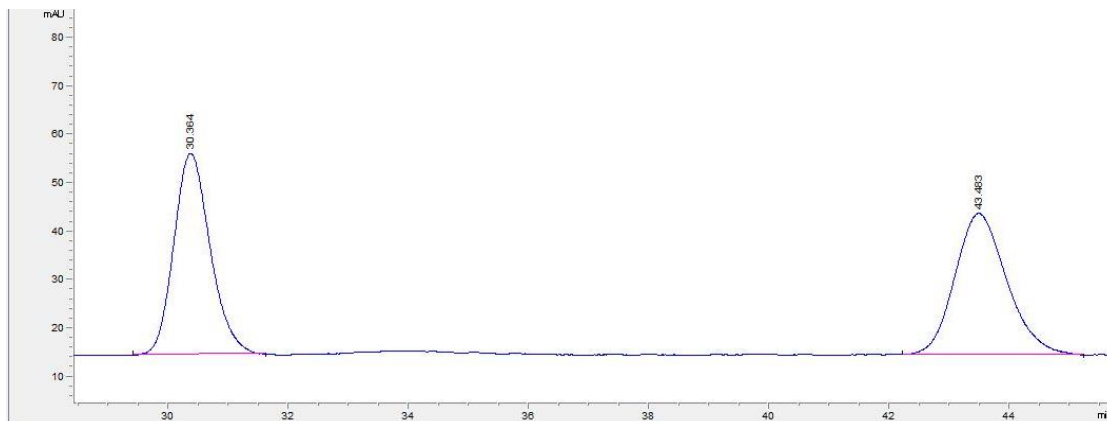

| Area Percent Report |               |              |        |              |
|---------------------|---------------|--------------|--------|--------------|
| Peak                | RetTime [min] | Area [mAU*s] | Area % | Height [mAU] |
| 1                   | 30.364        | 1751.4       | 49.957 | 41.6         |
| 2                   | 43.483        | 1754.4       | 50.043 | 29.2         |

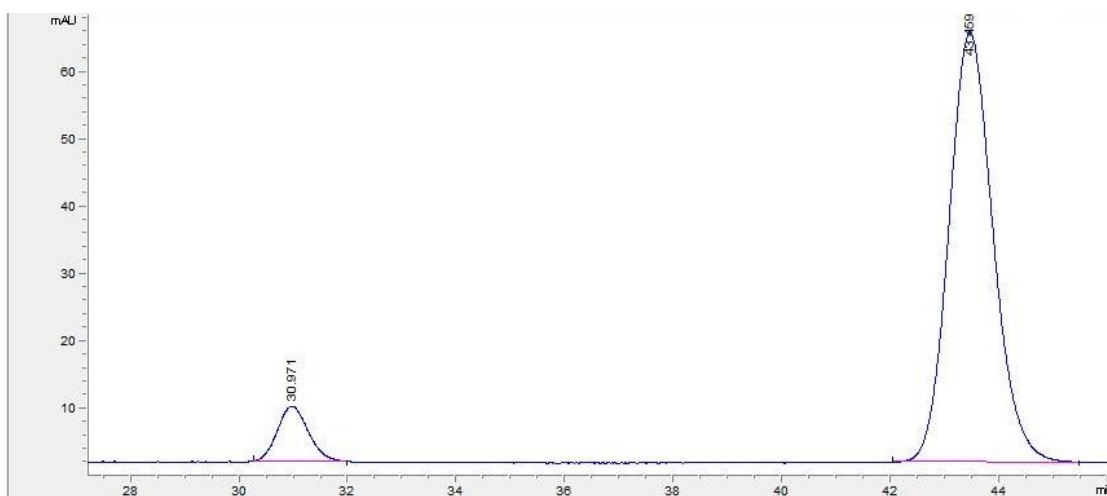

| Area Percent Report |               |              |        |              |
|---------------------|---------------|--------------|--------|--------------|
| Peak                | RetTime [min] | Area [mAU*s] | Area % | Height [mAU] |
| 1                   | 30.971        | 323.2        | 8.228  | 8.2          |
| 2                   | 43.459        | 3604.5       | 91.772 | 63.9         |

**(R)-4-methoxy-N-(1-3-methoxyphenyl)ethylbenzenesulfonamide (1b')**

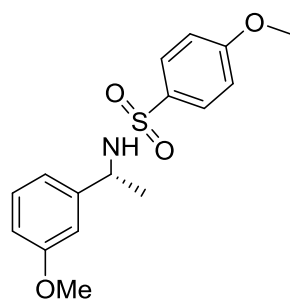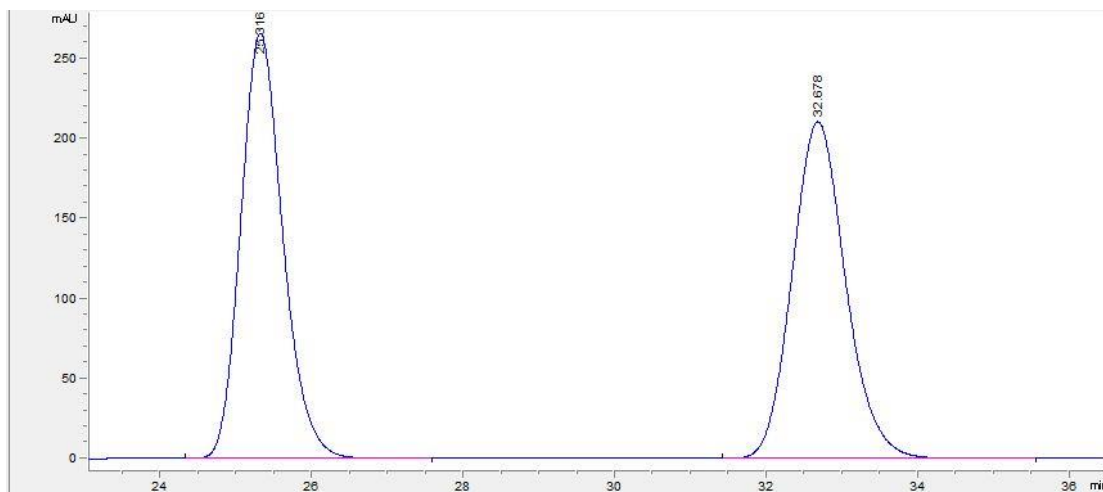

Area Percent Report

| Peak | RetTime [min] | Area [mAU*s] | Area % | Height [mAU] |
|------|---------------|--------------|--------|--------------|
| 1    | 25.316        | 10277.6      | 49.879 | 266          |
| 2    | 32.678        | 10327.5      | 50.121 | 210.6        |

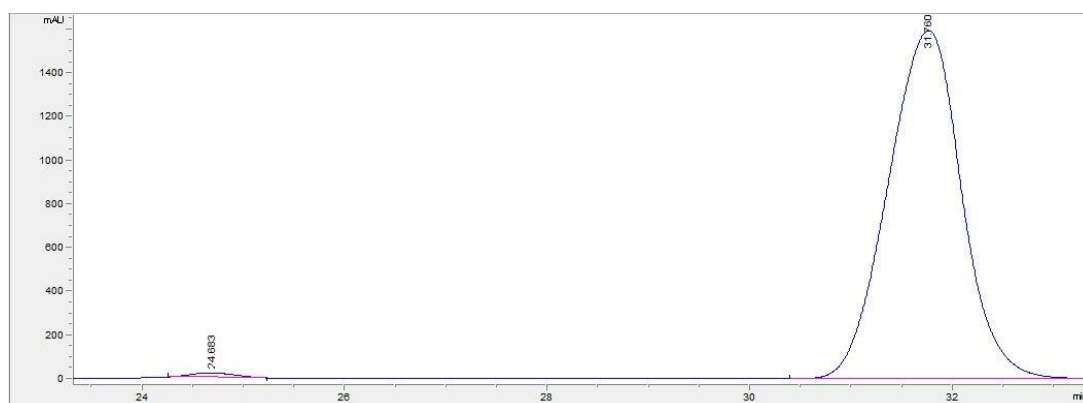

Area Percent Report

| Peak | RetTime [min] | Area [mAU*s] | Area % | Height [mAU] |
|------|---------------|--------------|--------|--------------|
| 1    | 24.683        | 741.3        | 0.915  | 22.7         |
| 2    | 31.76         | 80313.9      | 99.085 | 1592.8       |

**(S)-5-methoxy-2-((4-methoxyphenyl)sulfonyl)-3-methylisoindolin-1-one (2b)**

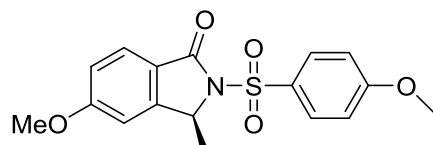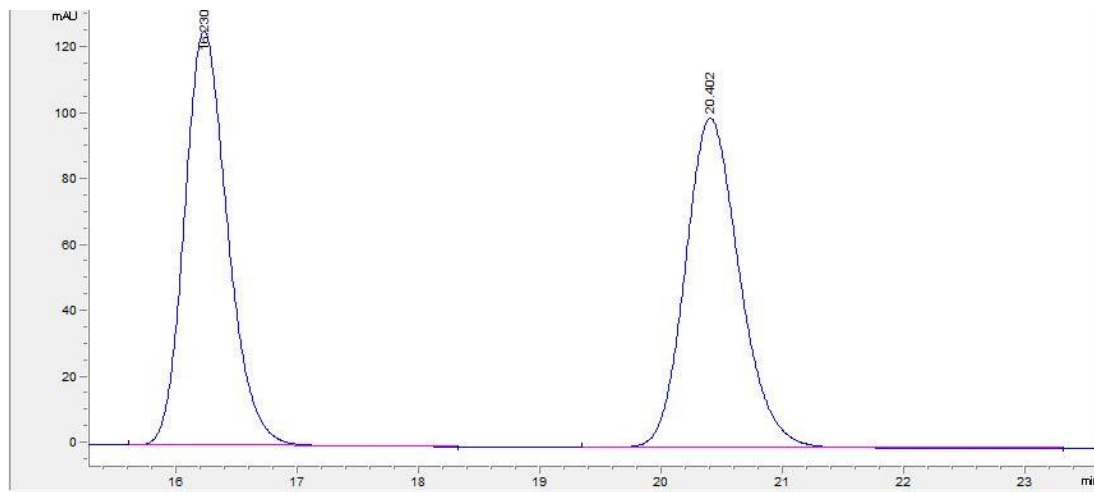

-----  
**Area Percent Report**  
-----

| Peak | RetTime [min] | Area [mAU*s] | Area % | Height [mAU] |
|------|---------------|--------------|--------|--------------|
| 1    | 16.23         | 3116         | 50.069 | 125.9        |
| 2    | 20.402        | 3107.3       | 49.931 | 100          |

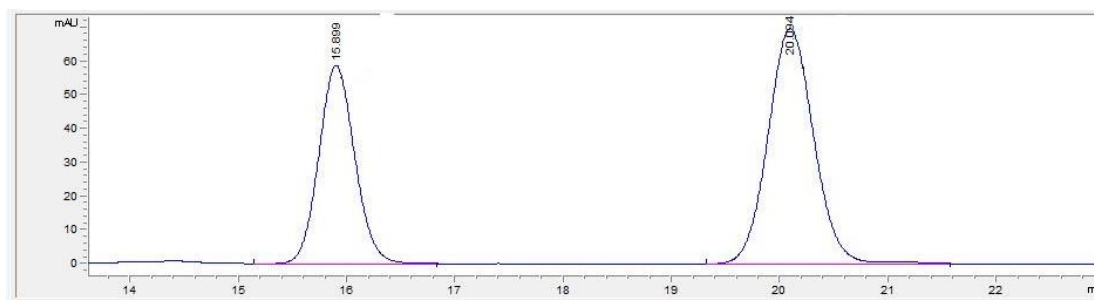

-----  
**Area Percent Report**  
-----

| Peak | RetTime [min] | Area [mAU*s] | Area % | Height [mAU] |
|------|---------------|--------------|--------|--------------|
| 1    | 15.899        | 1405         | 40.018 | 59.2         |
| 2    | 20.094        | 2105.9       | 59.982 | 70.1         |

**(R)-4-methoxy-N-(1-(p-tolyl)ethyl)benzenesulfonamide (1c')**

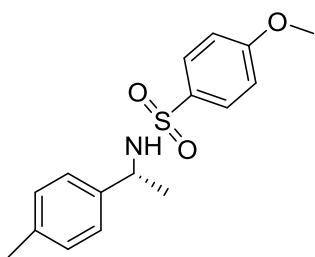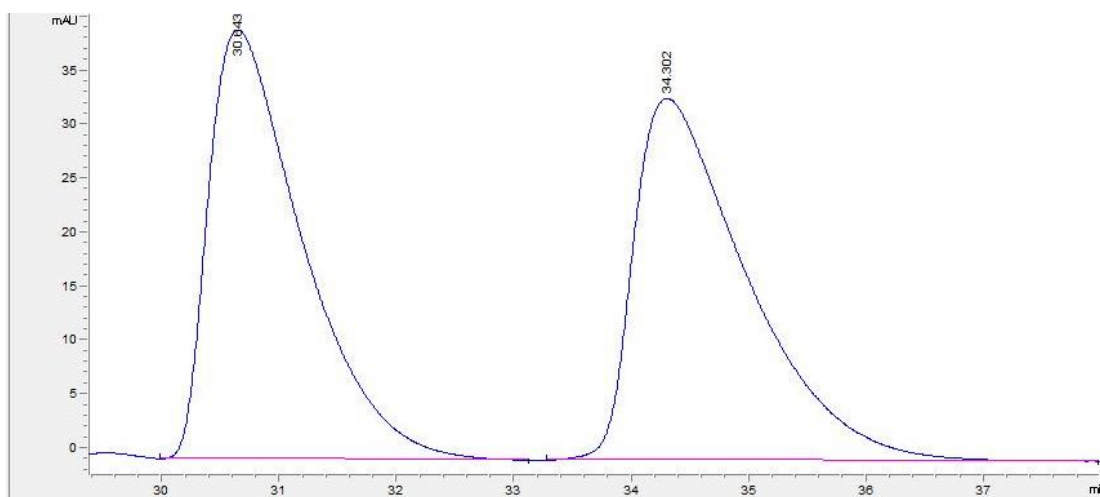

Area Percent Report

| Peak | RetTime [min] | Area [mAU*s] | Area % | Height [mAU] |
|------|---------------|--------------|--------|--------------|
| 1    | 30.643        | 2219.9       | 49.526 | 39.8         |
| 2    | 34.302        | 2262.4       | 50.474 | 33.6         |

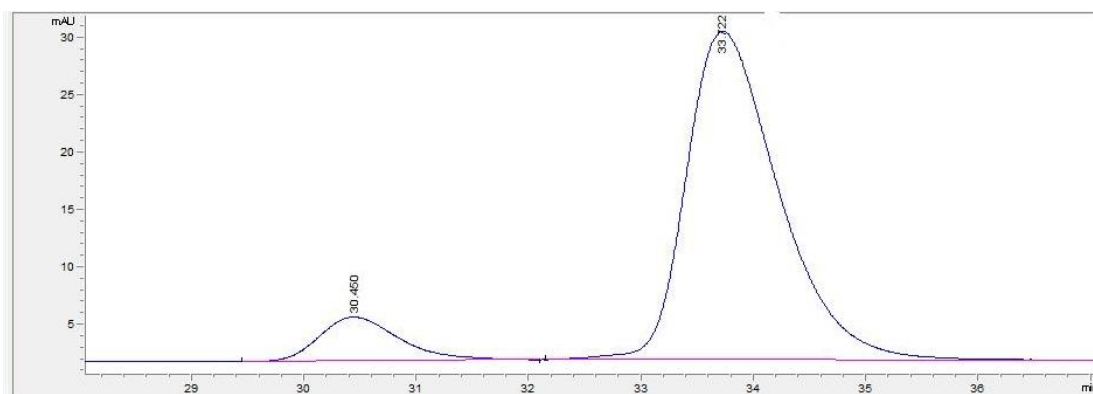

Area Percent Report

| Peak | RetTime [min] | Area [mAU*s] | Area % | Height [mAU] |
|------|---------------|--------------|--------|--------------|
| 1    | 30.450        | 191.7        | 10.430 | 3.8          |
| 2    | 33.722        | 1646.6       | 89.570 | 28.6         |

**(S)-2-((4-methoxyphenyl)sulfonyl)-3,6-dimethylisoindolin-1-one (2c)**

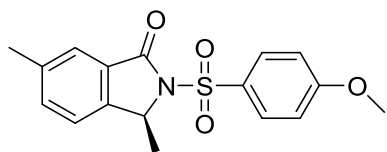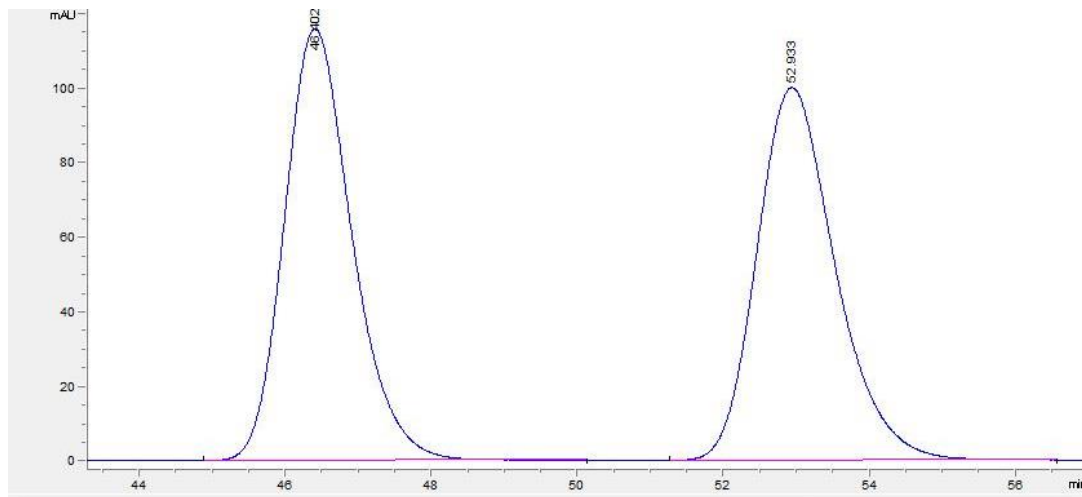

-----  
**Area Percent Report**  
-----

| Peak | RetTime [min] | Area [mAU*s] | Area % | Height [mAU] |
|------|---------------|--------------|--------|--------------|
| 1    | 46.402        | 7445.5       | 49.954 | 115.7        |
| 2    | 52.933        | 7459.2       | 50.046 | 99.9         |

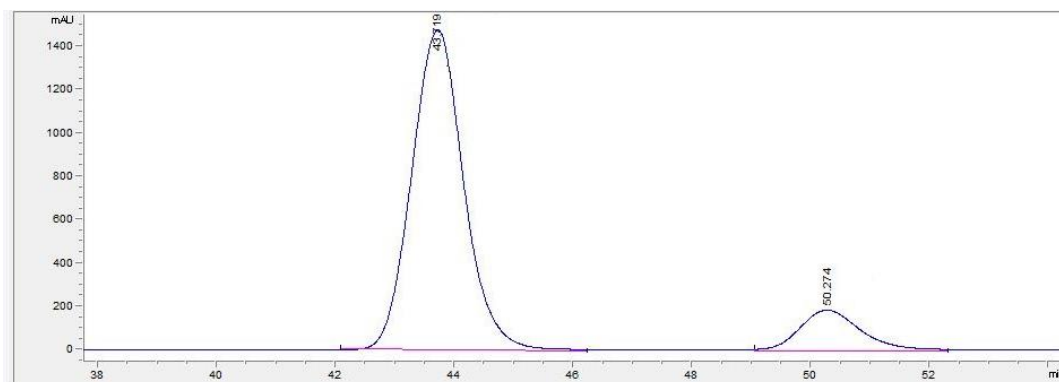

-----  
**Area Percent Report**  
-----

| Peak | RetTime [min] | Area [mAU*s] | Area % | Height [mAU] |
|------|---------------|--------------|--------|--------------|
| 1    | 43.719        | 89834.8      | 86.750 | 1475.5       |
| 2    | 50.274        | 13720.6      | 13.250 | 188.6        |



**(R)-N-(1-(4-ethylphenyl)ethyl)-4-methoxybenzenesulfonamide (1d')**

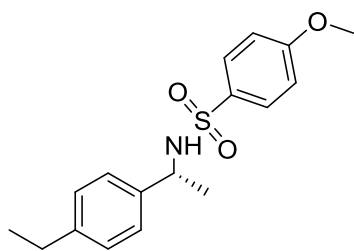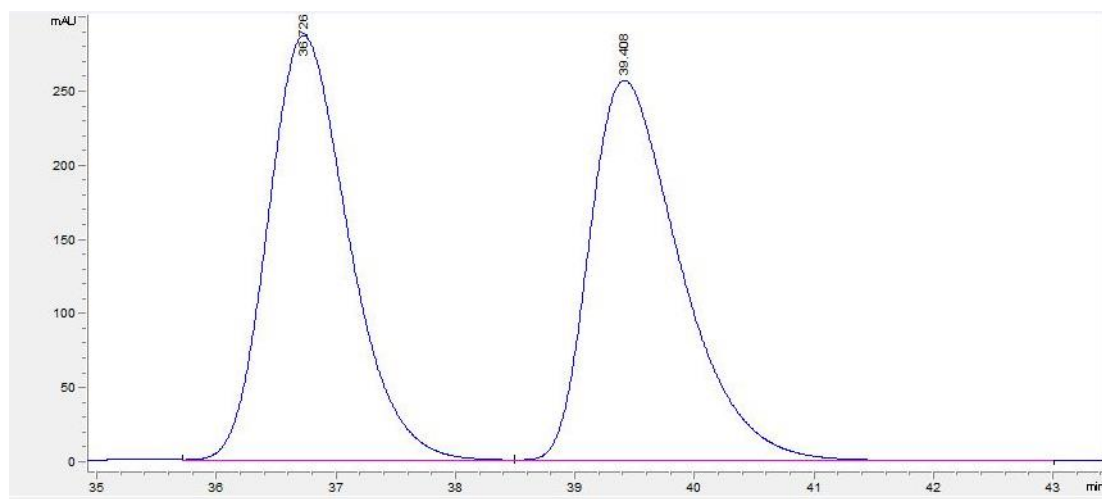

Area Percent Report

| Peak | RetTime [min] | Area [mAU*s] | Area % | Height [mAU] |
|------|---------------|--------------|--------|--------------|
| 1    | 36.726        | 13571.4      | 49.931 | 287.2        |
| 2    | 39.408        | 136.08.7     | 50.069 | 256.9        |

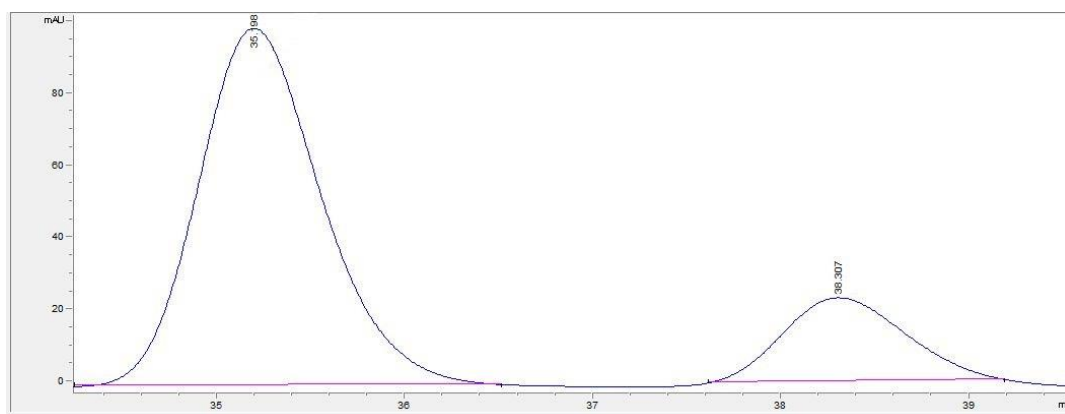

Area Percent Report

| Peak | RetTime [min] | Area [mAU*s] | Area % | Height [mAU] |
|------|---------------|--------------|--------|--------------|
| 1    | 35.198        | 4494.3       | 81.163 | 99.1         |
| 2    | 38.307        | 1043.1       | 18.837 | 23.2         |

**(S)-6-ethyl-2-((4-methoxyphenyl)sulfonyl)-3-methylisindolin-1-one (2d)**

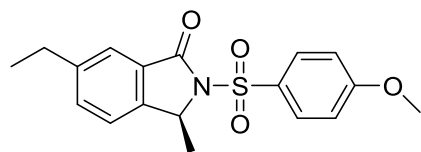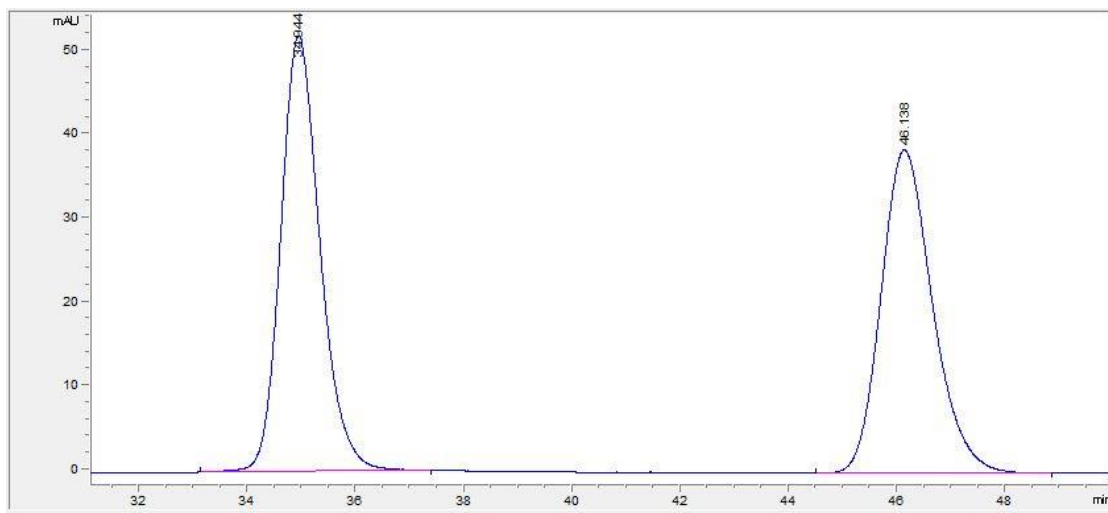

-----  
**Area Percent Report**  
-----

| Peak | RetTime [min] | Area [mAU*s] | Area % | Height [mAU] |
|------|---------------|--------------|--------|--------------|
| 1    | 34.944        | 2626.3       | 50.780 | 51.9         |
| 2    | 46.138        | 2545.7       | 49.220 | 38.5         |

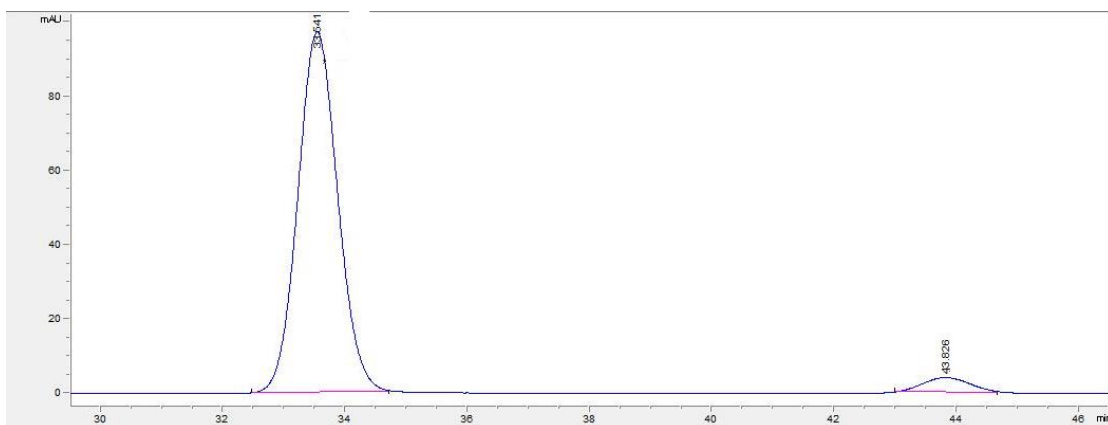

-----  
**Area Percent Report**  
-----

| Peak | RetTime [min] | Area [mAU*s] | Area % | Height [mAU] |
|------|---------------|--------------|--------|--------------|
| 1    | 33.541        | 4425.9       | 95.087 | 97.3         |
| 2    | 43.826        | 228.7        | 4.913  | 4.1          |

**(R)-N-(1-(4-isopropylphenyl)ethyl)-4-methoxybenzenesulfonamide (1e')**

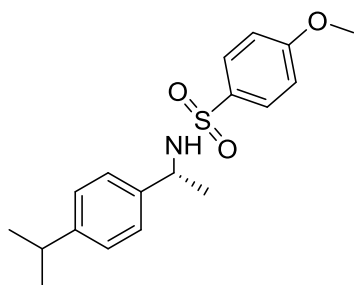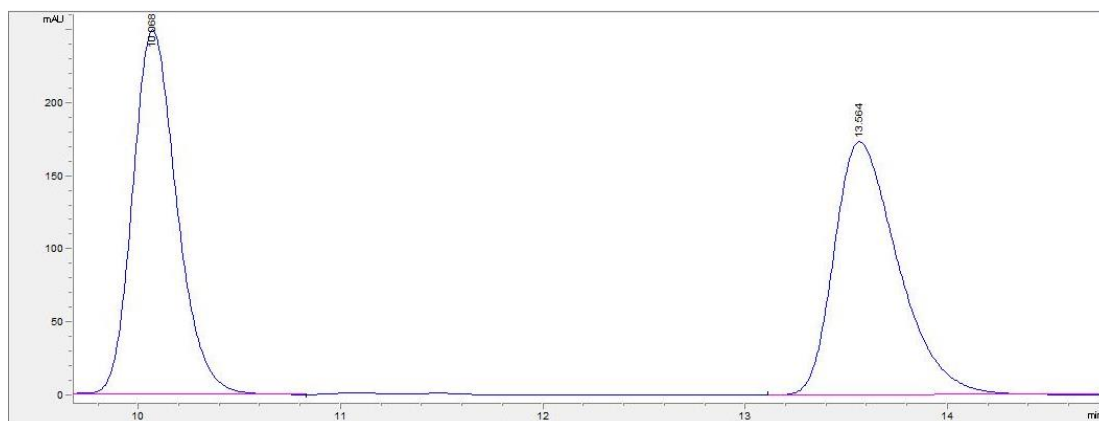

-----  
**Area Percent Report**  
-----

| Peak | RetTime [min] | Area [mAU*s] | Area % | Height [mAU] |
|------|---------------|--------------|--------|--------------|
| 1    | 10.068        | 3821.9       | 50.029 | 250          |
| 2    | 13.564        | 3817.5       | 49.971 | 173.3        |

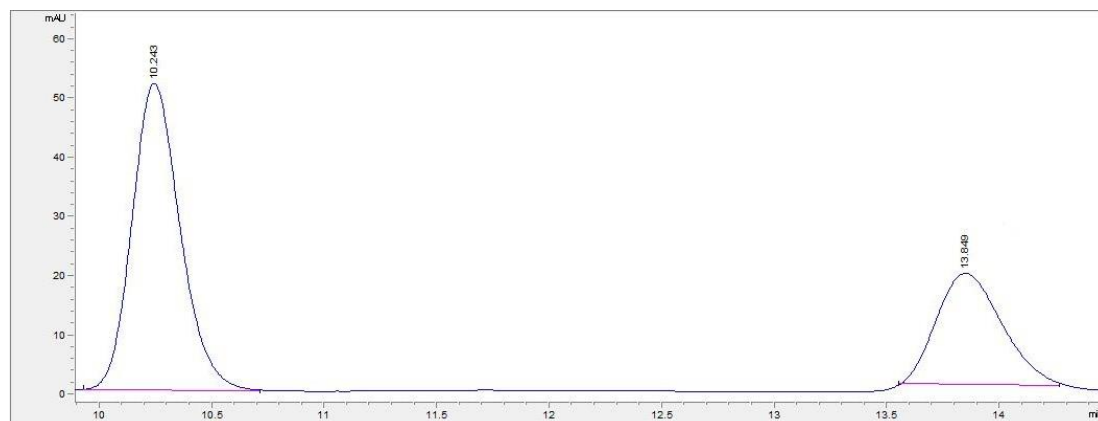

-----  
**Area Percent Report**  
-----

| Peak | RetTime [min] | Area [mAU*s] | Area % | Height [mAU] |
|------|---------------|--------------|--------|--------------|
| 1    | 10.243        | 776.3        | 67.118 | 52           |
| 2    | 13.849        | 380.3        | 32.882 | 18.8         |

**(S)-6-isopropyl-2-((4-methoxyphenyl)sulfonyl)-3-methylisoindolin-1-one (2e)**

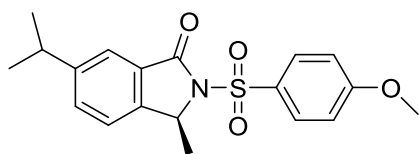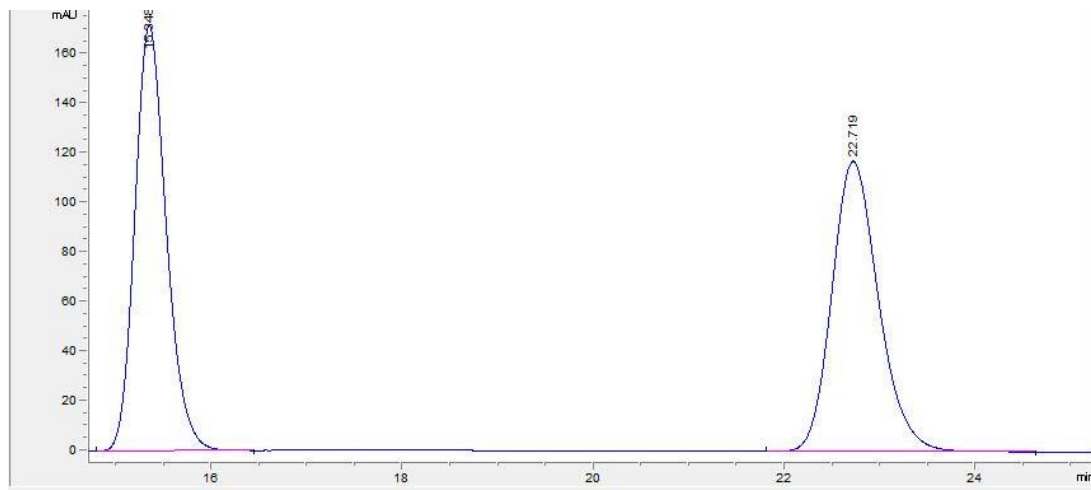

-----  
**Area Percent Report**  
-----

| Peak | RetTime [min] | Area [mAU*s] | Area % | Height [mAU] |
|------|---------------|--------------|--------|--------------|
| 1    | 15.348        | 3945.9       | 49.812 | 171.7        |
| 2    | 22.719        | 3975.7       | 50.188 | 117.1        |

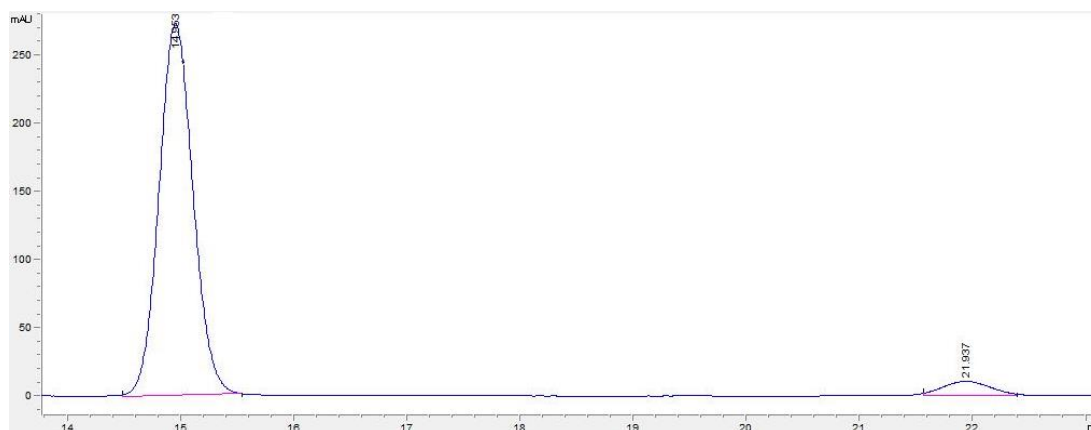

-----  
**Area Percent Report**  
-----

| Peak | RetTime [min] | Area [mAU*s] | Area % | Height [mAU] |
|------|---------------|--------------|--------|--------------|
| 1    | 14.953        | 5706.8       | 95.037 | 272.9        |
| 2    | 21.937        | 298          | 4.963  | 10.3         |

**(R)-4-methoxy-N-(1-(4-methoxyphenyl)ethyl)benzenesulfonamide (1f')**

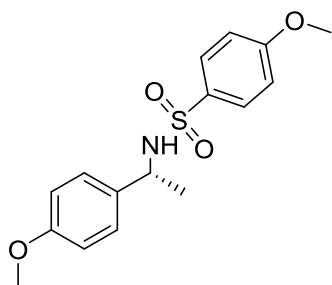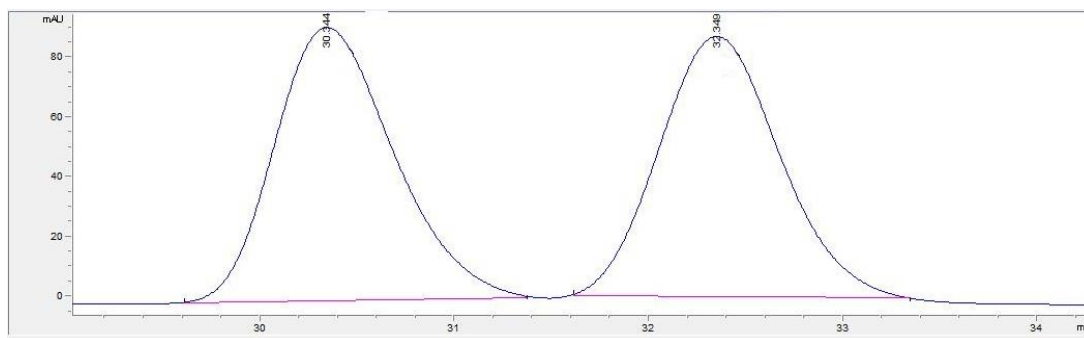

-----  
**Area Percent Report**  
-----

| Peak | RetTime [min] | Area [mAU*s] | Area % | Height [mAU] |
|------|---------------|--------------|--------|--------------|
| 1    | 30.344        | 3906.9       | 50.913 | 91.6         |
| 2    | 32.349        | 3766.7       | 49.087 | 49.087       |

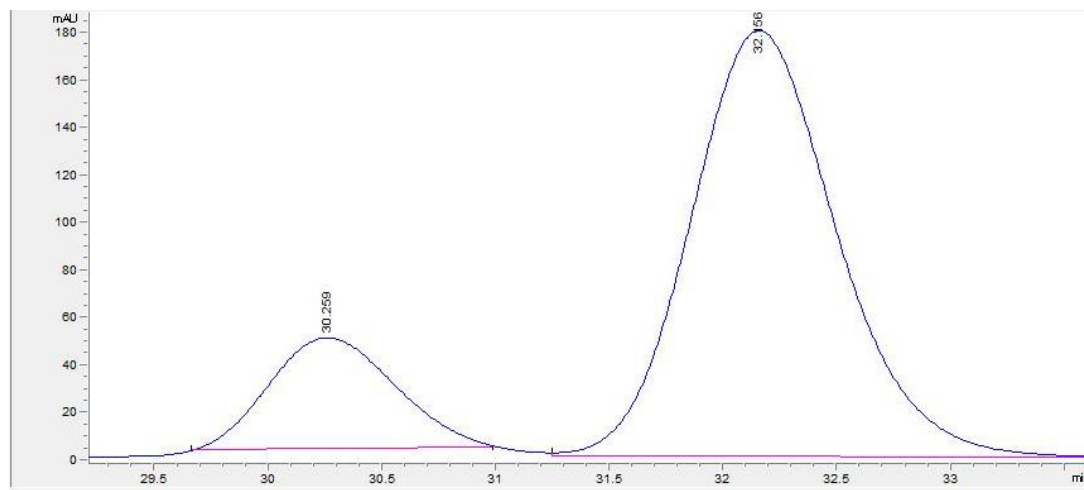

-----  
**Area Percent Report**  
-----

| Peak | RetTime [min] | Area [mAU*s] | Area % | Height [mAU] |
|------|---------------|--------------|--------|--------------|
| 1    | 30.259        | 1815.7       | 18.418 | 47           |
| 2    | 32.156        | 8042.8       | 81.582 | 179.7        |

**(S)-6-methoxy-2-((4-methoxyphenyl)sulfonyl)-3-methylisoindolin-1-one (2f)**

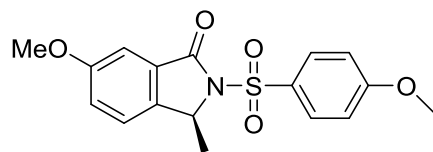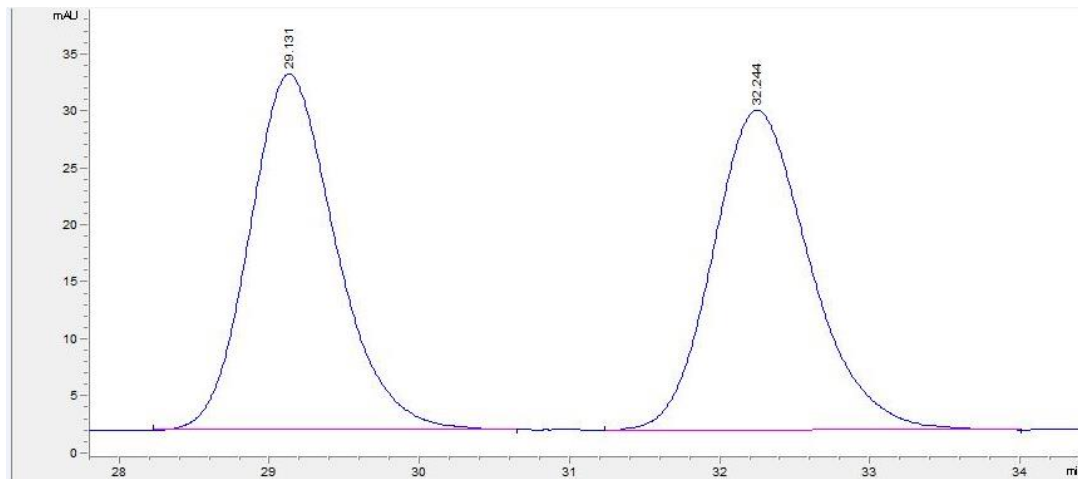

-----  
**Area Percent Report**  
-----

| Peak | RetTime [min] | Area [mAU*s] | Area % | Height [mAU] |
|------|---------------|--------------|--------|--------------|
| 1    | 29.131        | 1251         | 49.751 | 31.2         |
| 2    | 32.244        | 1263.5       | 50.249 | 28.1         |

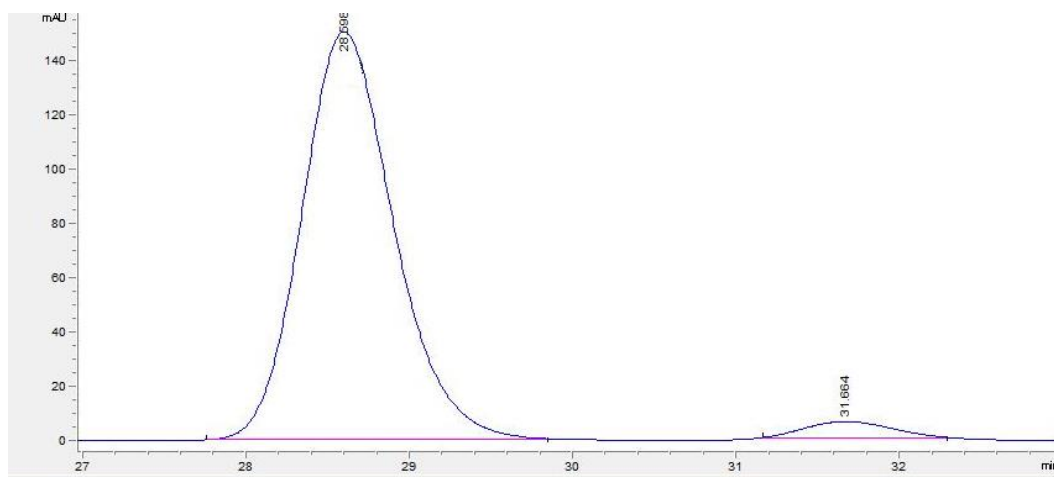

-----  
**Area Percent Report**  
-----

| Peak | RetTime [min] | Area [mAU*s] | Area % | Height [mAU] |
|------|---------------|--------------|--------|--------------|
| 1    | 28.598        | 5878.3       | 96.328 | 150.3        |
| 2    | 31.664        | 224.1        | 3.672  | 6.1          |

**(R)-4-methoxy-N-(2-methyl-1-phenylpropyl)benzenesulfonamide (1g')**

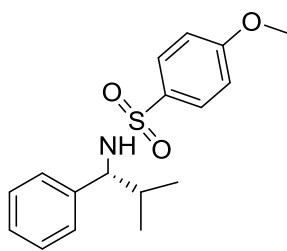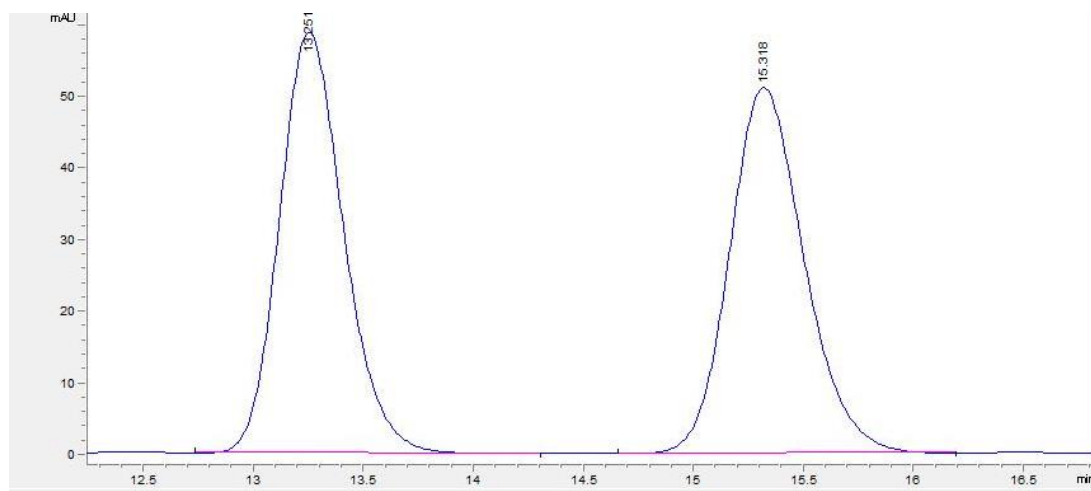

-----  
**Area Percent Report**  
-----

| Peak | RetTime [min] | Area [mAU*s] | Area % | Height [mAU] |
|------|---------------|--------------|--------|--------------|
| 1    | 13.251        | 1198.4       | 49.855 | 58.8         |
| 2    | 15.318        | 1205.4       | 50.145 | 51.1         |

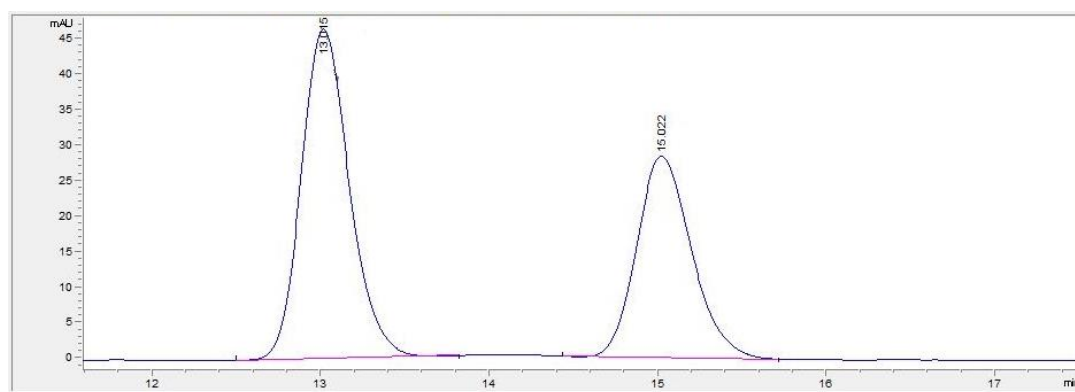

-----  
**Area Percent Report**  
-----

| Peak | RetTime [min] | Area [mAU*s] | Area % | Height [mAU] |
|------|---------------|--------------|--------|--------------|
| 1    | 13.015        | 919.2        | 58.885 | 46.4         |
| 2    | 15.022        | 641.8        | 41.115 | 28.4         |

**(S)-3-isopropyl-2-((4-methoxyphenyl)sulfonyl)isoindolin-1-one (2g)**

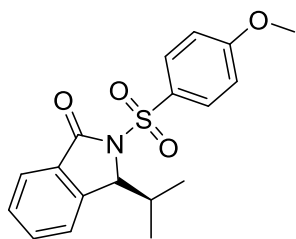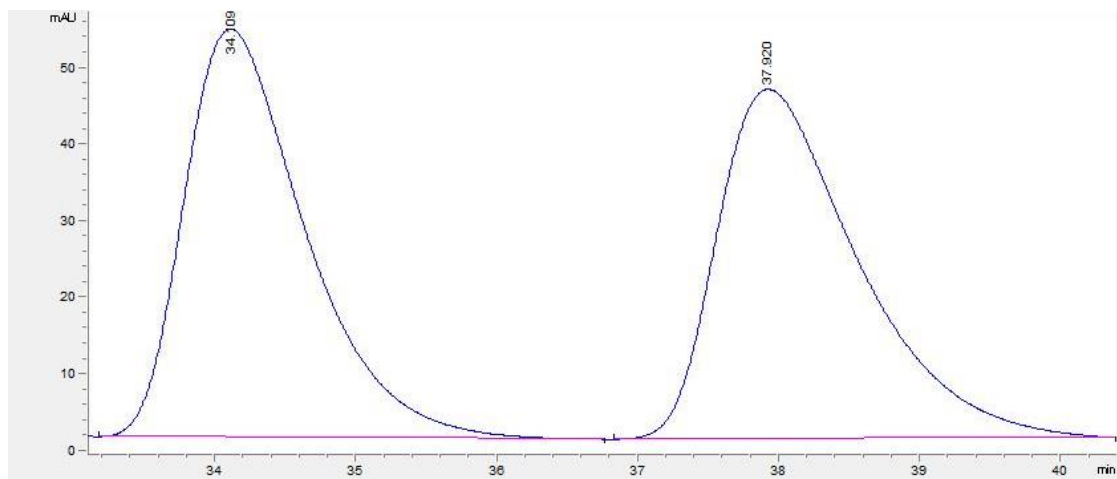

-----  
**Area Percent Report**  
-----

| Peak | RetTime [min] | Area [mAU*s] | Area % | Height [mAU] |
|------|---------------|--------------|--------|--------------|
| 1    | 34.109        | 3181.1       | 50.070 | 53.3         |
| 2    | 37.92         | 3172.2       | 49.930 | 45.6         |

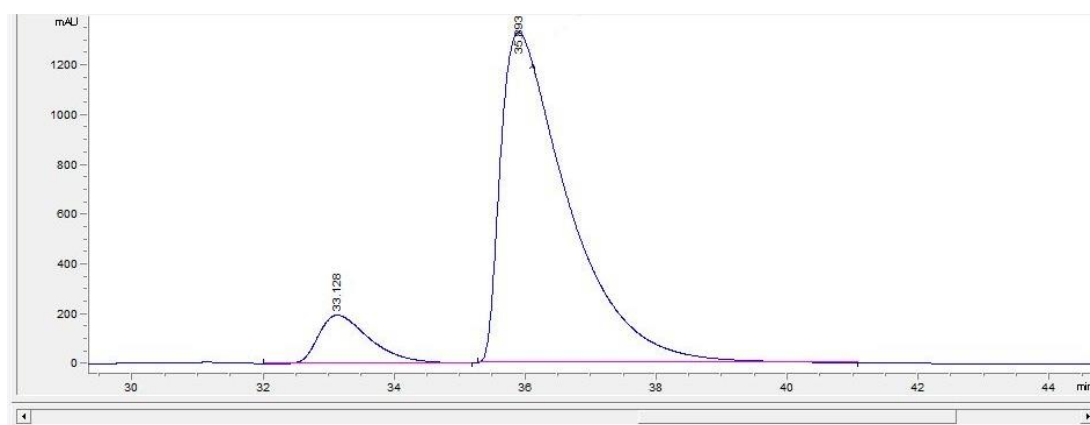

-----  
**Area Percent Report**  
-----

| Peak | RetTime [min] | Area [mAU*s] | Area % | Height [mAU] |
|------|---------------|--------------|--------|--------------|
| 1    | 33.128        | 10468.4      | 9.873  | 193.9        |
| 2    | 35.893        | 95563.8      | 90.127 | 1327.1       |



**(R)-N-(cyclohexyl (phenyl)methyl)-4-methoxybenzenesulfonamid (1h')**

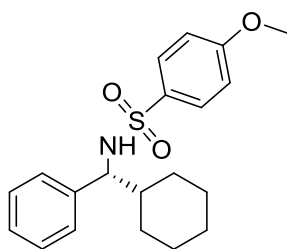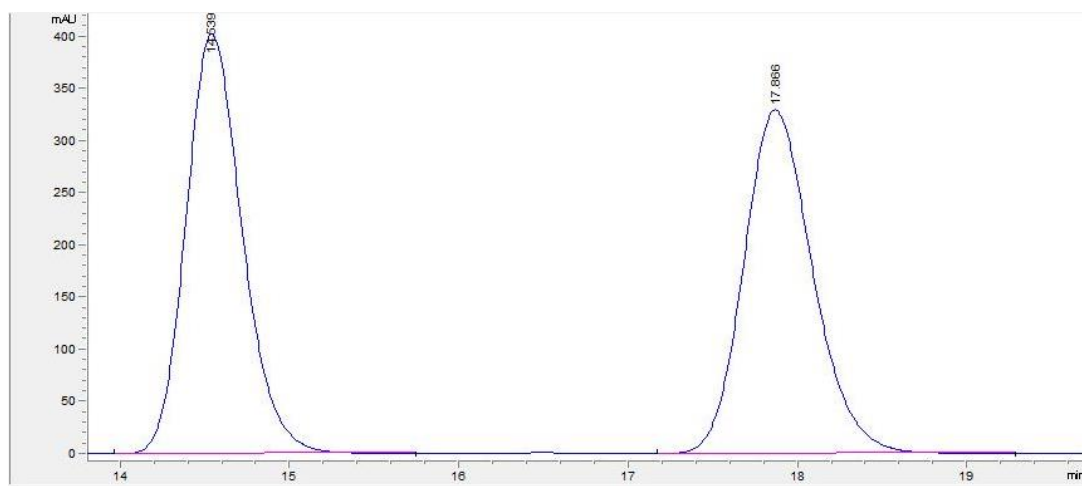

-----  
**Area Percent Report**  
-----

| Peak | RetTime [min] | Area [mAU*s] | Area % | Height [mAU] |
|------|---------------|--------------|--------|--------------|
| 1    | 14.539        | 9335.8       | 49.977 | 402.7        |
| 2    | 17.866        | 9344.3       | 50.023 | 329.6        |

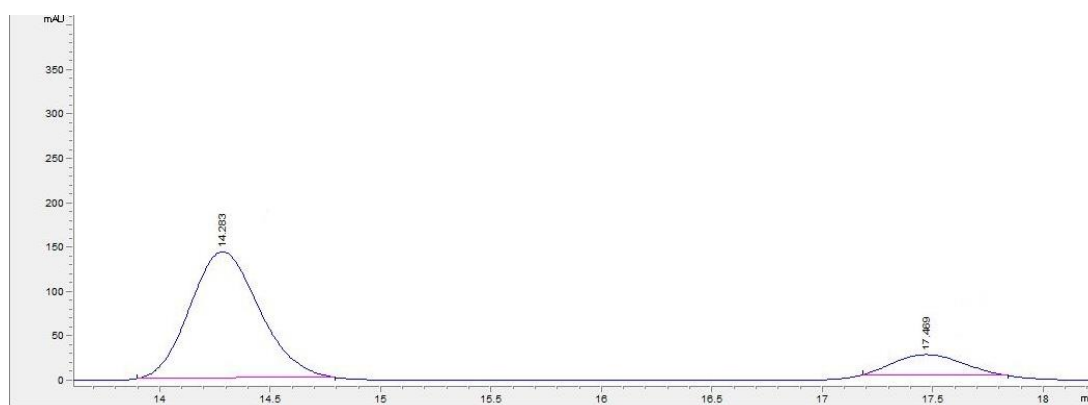

-----  
**Area Percent Report**  
-----

| Peak | RetTime [min] | Area [mAU*s] | Area % | Height [mAU] |
|------|---------------|--------------|--------|--------------|
| 1    | 14.283        | 3110.4       | 86.509 | 142.6        |
| 2    | 17.469        | 485.1        | 13.491 | 22.9         |

**(S)-3-cyclohexyl-2-((4-methoxyphenyl)sulfonyl)isoindolin-1-one (2h)**

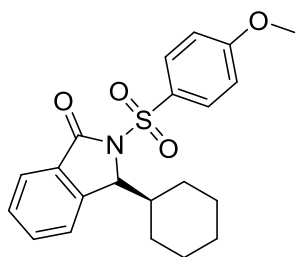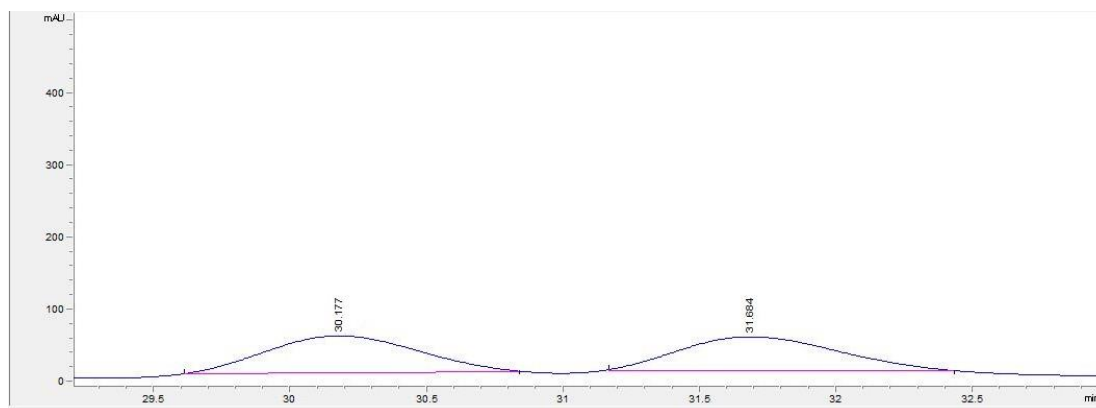

-----  
**Area Percent Report**  
-----

| Peak | RetTime [min] | Area [mAU*s] | Area % | Height [mAU] |
|------|---------------|--------------|--------|--------------|
| 1    | 30.177        | 2067         | 50.019 | 52.6         |
| 2    | 31.684        | 1984.4       | 49.981 | 48.3         |

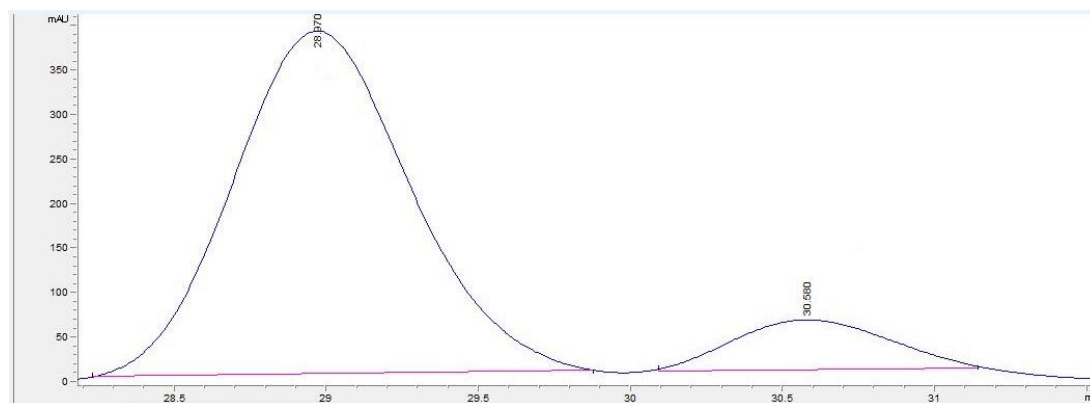

-----  
**Area Percent Report**  
-----

| Peak | RetTime [min] | Area [mAU*s] | Area % | Height [mAU] |
|------|---------------|--------------|--------|--------------|
| 1    | 28.97         | 15625.2      | 88.815 | 385.8        |
| 2    | 30.58         | 1967.8       | 11.185 | 55.8         |

**(R)-Methyl 3-(4-ethylphenyl)-3-((4-methoxyphenyl)sulfonamide)propanoate (1i')**

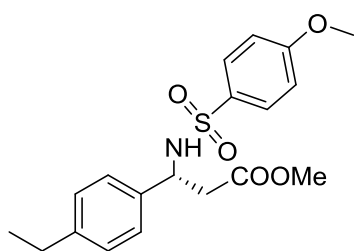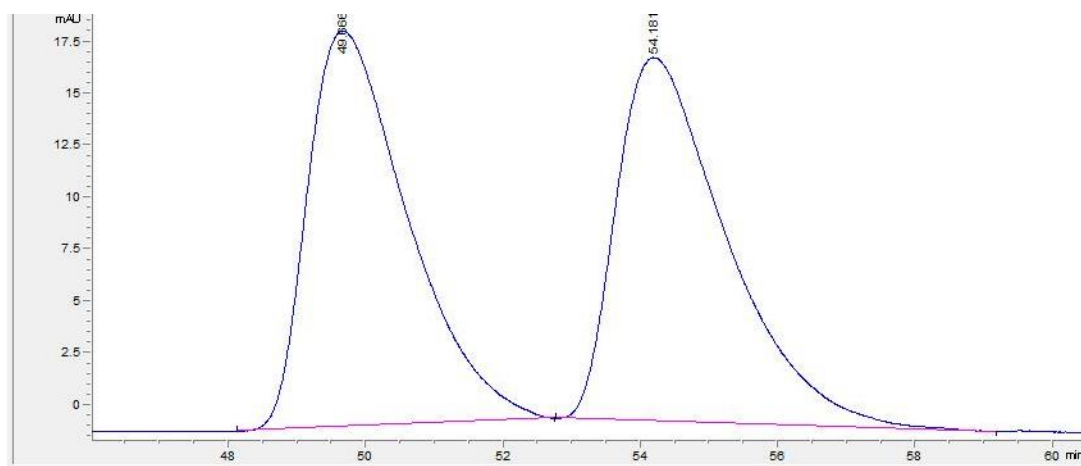

Area Percent Report

| Peak | RetTime [min] | Area [mAU*s] | Area % | Height [mAU] |
|------|---------------|--------------|--------|--------------|
| 1    | 49.666        | 1936         | 49.657 | 19.1         |
| 2    | 54.181        | 1962.8       | 50.343 | 17.5         |

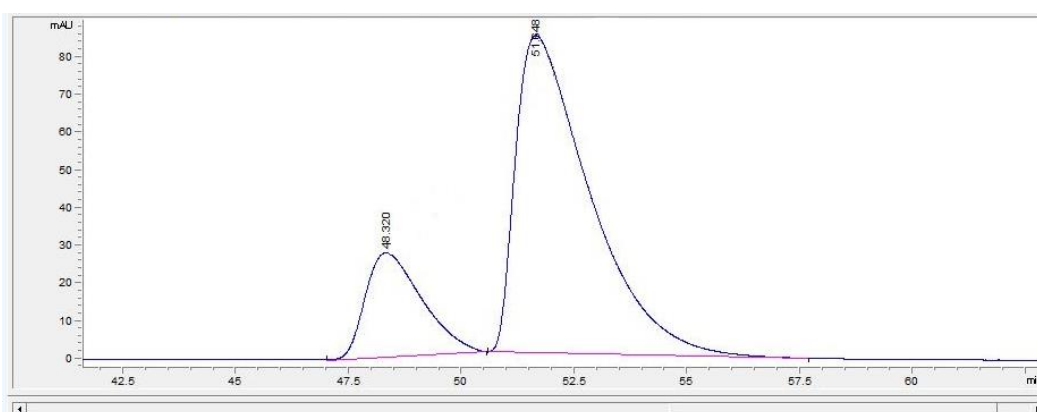

Area Percent Report

| Peak | RetTime [min] | Area [mAU*s] | Area % | Height [mAU] |
|------|---------------|--------------|--------|--------------|
| 1    | 48.32         | 2424.5       | 20.056 | 27.8         |
| 2    | 51.648        | 9664.2       | 79.944 | 84.2         |

**(S)-methyl-2-(5-ethyl-2-((4-methoxyphenyl)sulfonyl)-3-oxoisindolin-1-yl)acetate  
(2i)**

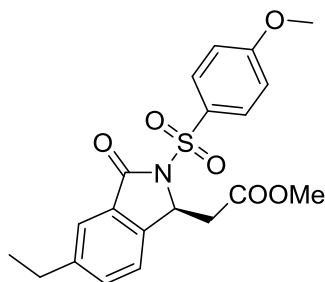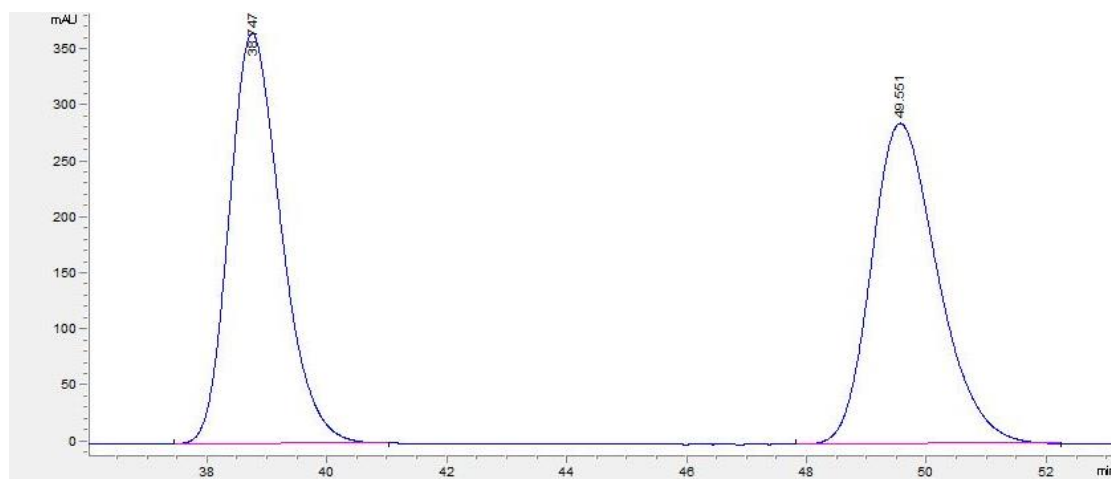

Area Percent Report

| Peak | RetTime [min] | Area [mAU*s] | Area % | Height [mAU] |
|------|---------------|--------------|--------|--------------|
| 1    | 38.747        | 22049.4      | 49.969 | 366.2        |
| 2    | 49.551        | 22076.9      | 50.031 | 286.2        |

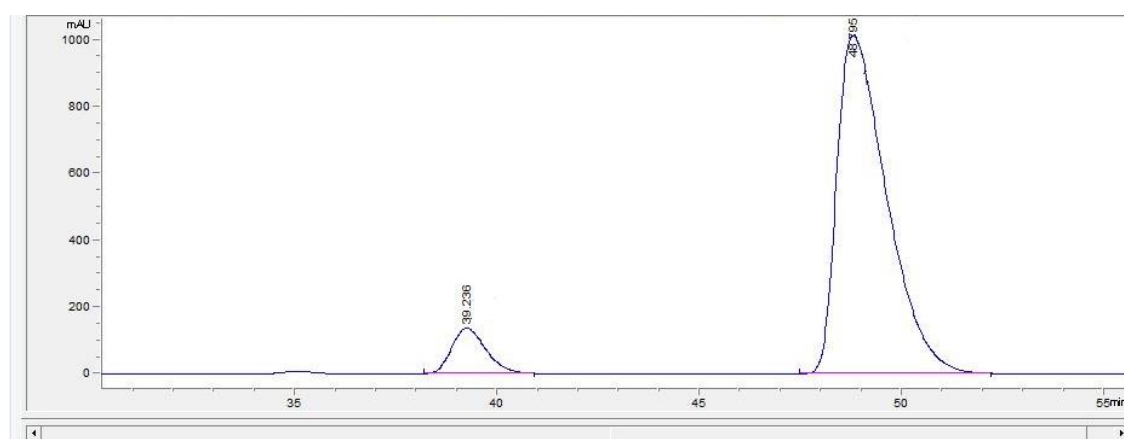

Area Percent Report

| Peak | RetTime [min] | Area [mAU*s] | Area % | Height [mAU] |
|------|---------------|--------------|--------|--------------|
| 1    | 39.236        | 8033.4       | 8.509  | 136.1        |
| 2    | 48.795        | 86372.2      | 91.491 | 1013.9       |

**(R)-Methyl 3-(4-methoxyphenyl)-3-((4-methoxyphenyl)sulfonamide)propanoate (1j)**

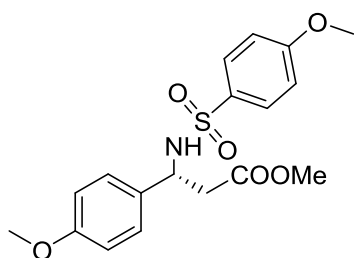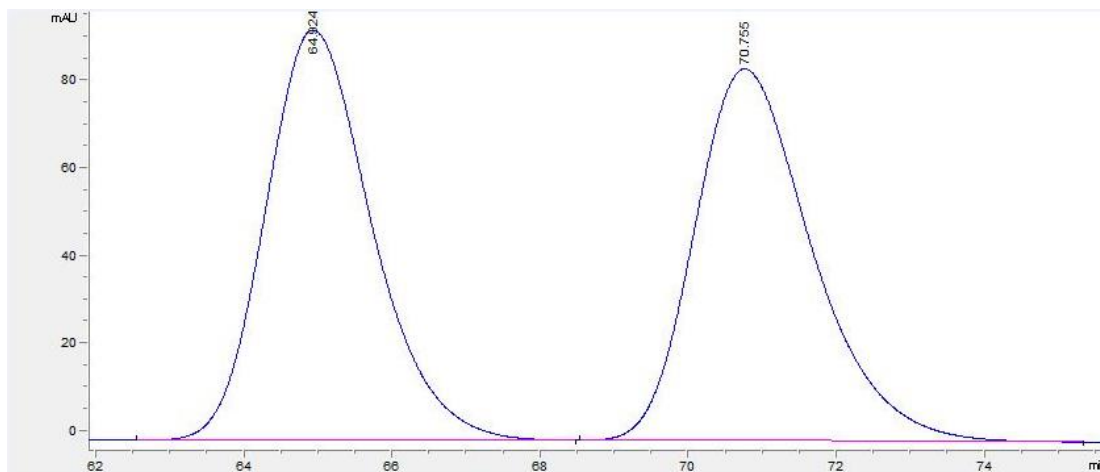

Area Percent Report

| Peak | RetTime [min] | Area [mAU*s] | Area % | Height [mAU] |
|------|---------------|--------------|--------|--------------|
| 1    | 64.924        | 9361         | 49.997 | 93.7         |
| 2    | 70.755        | 9362.1       | 50.003 | 85           |

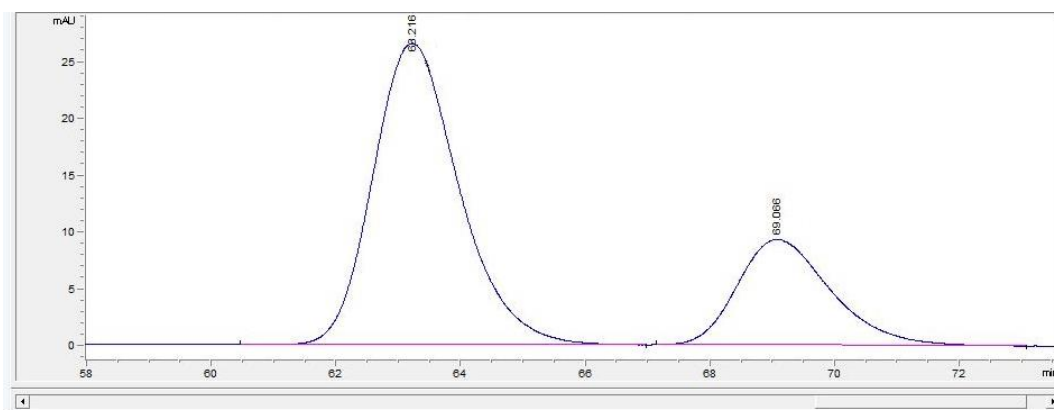

Area Percent Report

| Peak | RetTime [min] | Area [mAU*s] | Area % | Height [mAU] |
|------|---------------|--------------|--------|--------------|
| 1    | 63.216        | 2559.4       | 72.491 | 26.5         |
| 2    | 69.066        | 971.2        | 27.509 | 9.3          |

**(S)-methyl-2-(5-methoxy-2-((4-methoxyphenyl)sulfonyl)-3-oxoisindolin-1-yl)acetate (2j)**

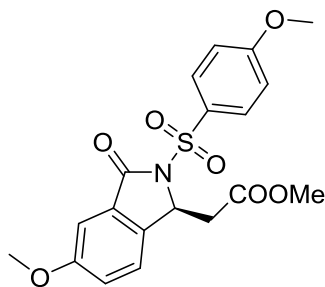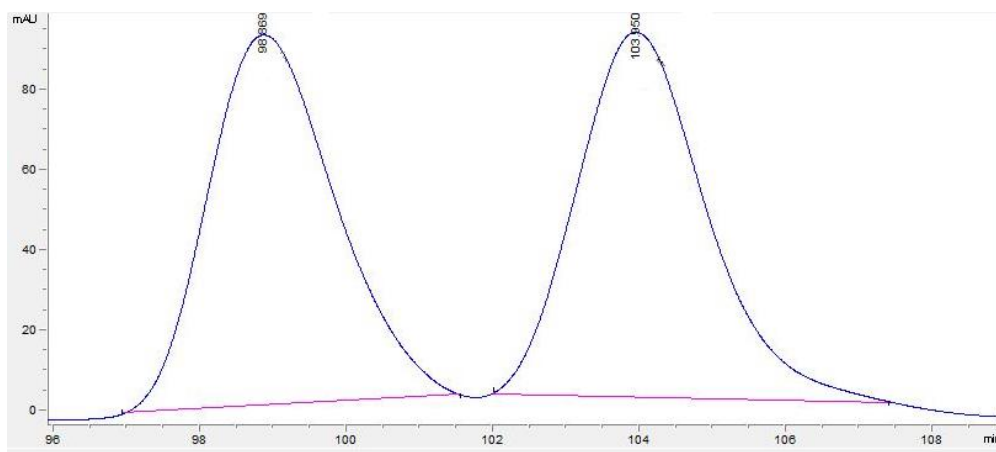

Area Percent Report

| Peak | RetTime [min] | Area [mAU*s] | Area % | Height [mAU] |
|------|---------------|--------------|--------|--------------|
| 1    | 98.869        | 11116        | 49.812 | 92.4         |
| 2    | 103.95        | 11199.9      | 50.188 | 91.1         |

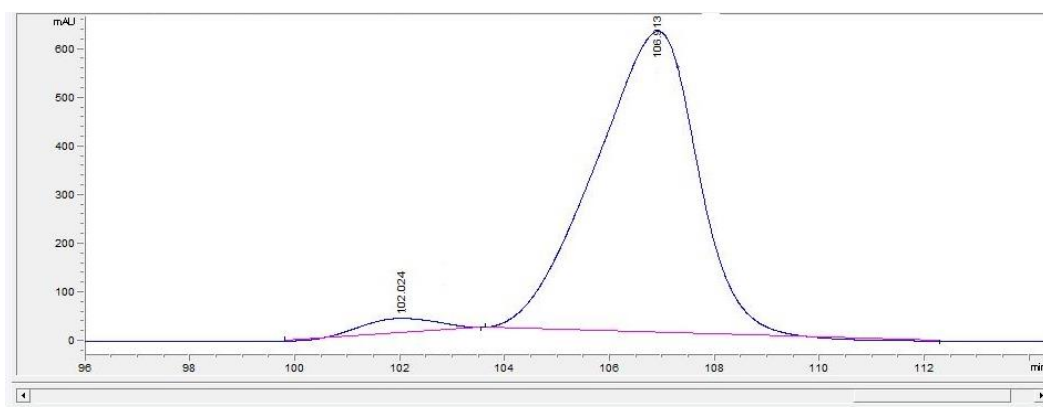

Area Percent Report

m

| Peak | RetTime [min] | Area [mAU*s] | Area % | Height [mAU] |
|------|---------------|--------------|--------|--------------|
| 1    | 102.024       | 3163         | 3.597  | 30.7         |
| 2    | 106.913       | 84777.7      | 96.403 | 620.2        |

**(R)-Methyl  
3-([1,1'-biphenyl]-4-yl)-3-((4-methoxyphenyl)sulfonamide)propanoate (1k')**

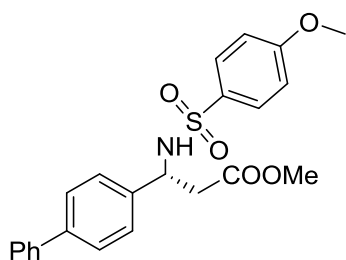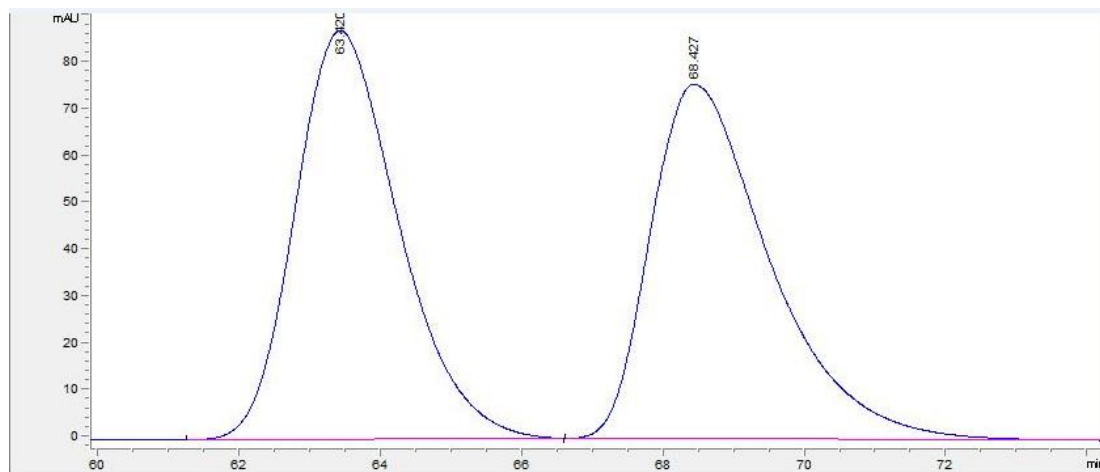

Area Percent Report

| Peak | RetTime [min] | Area [mAU*s] | Area % | Height [mAU] |
|------|---------------|--------------|--------|--------------|
| 1    | 63.42         | 8891.1       | 50.016 | 87.4         |
| 2    | 68.427        | 8885.2       | 49.984 | 75.8         |

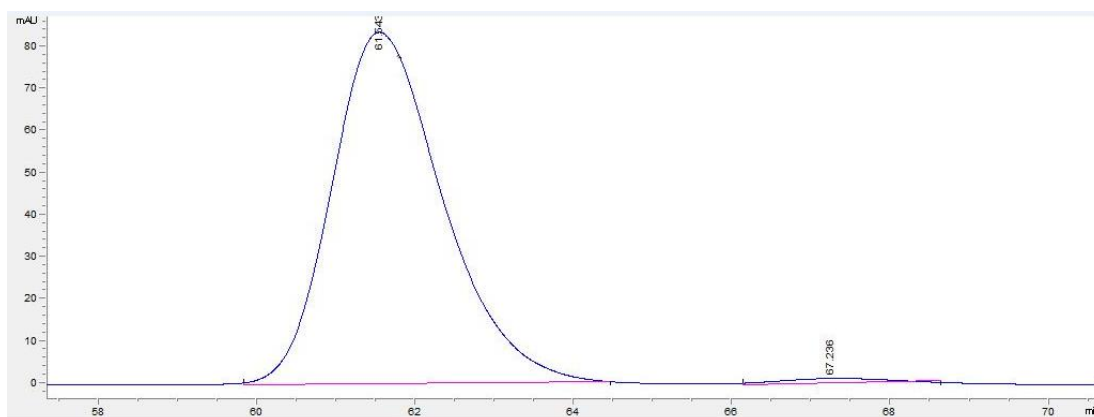

Area Percent Report

| Peak | RetTime [min] | Area [mAU*s] | Area % | Height [mAU] |
|------|---------------|--------------|--------|--------------|
| 1    | 61.543        | 8161.1       | 98.716 | 83.6         |
| 2    | 67.236        | 106.1        | 1.284  | 1.2          |

**(S)-methyl-2-(2-((4-methoxyphenyl)sulfonyl)-3-oxo-5-phenylisoindolin-1-yl)acetate (2k)**

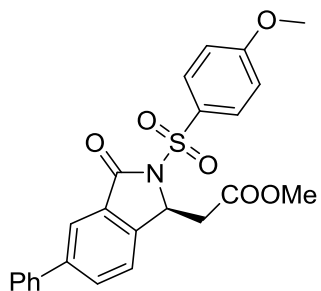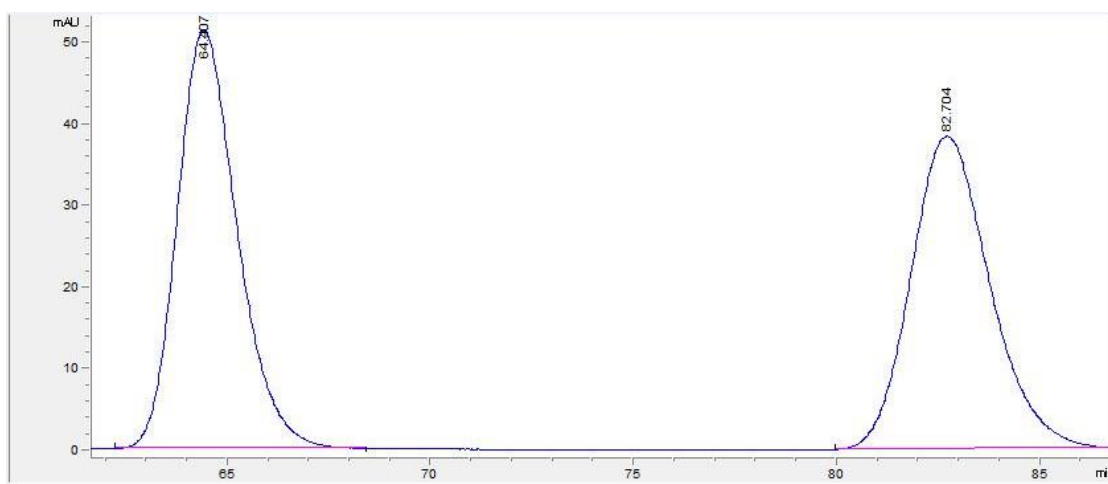

| Area Percent Report |               |              |        |              |
|---------------------|---------------|--------------|--------|--------------|
| Peak                | RetTime [min] | Area [mAU*s] | Area % | Height [mAU] |
| 1                   | 64.407        | 5262.9       | 50.464 | 51.2         |
| 2                   | 82.704        | 5166.1       | 49.536 | 38.3         |

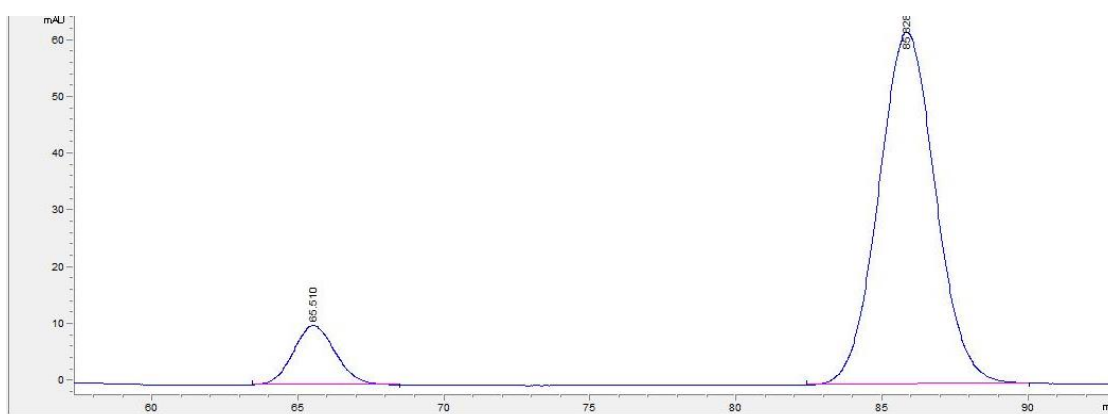

| Area Percent Report |               |              |        |              |
|---------------------|---------------|--------------|--------|--------------|
| Peak                | RetTime [min] | Area [mAU*s] | Area % | Height [mAU] |
| 1                   | 65.51         | 1045.8       | 11.076 | 10.4         |
| 2                   | 85.828        | 8396.4       | 88.924 | 62           |



**(R)-6-methoxy-2-((4-methoxyphenyl)sulfonyl)-3-methylisoindolin-1-one (2f')**

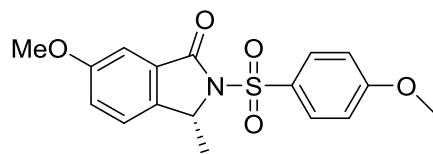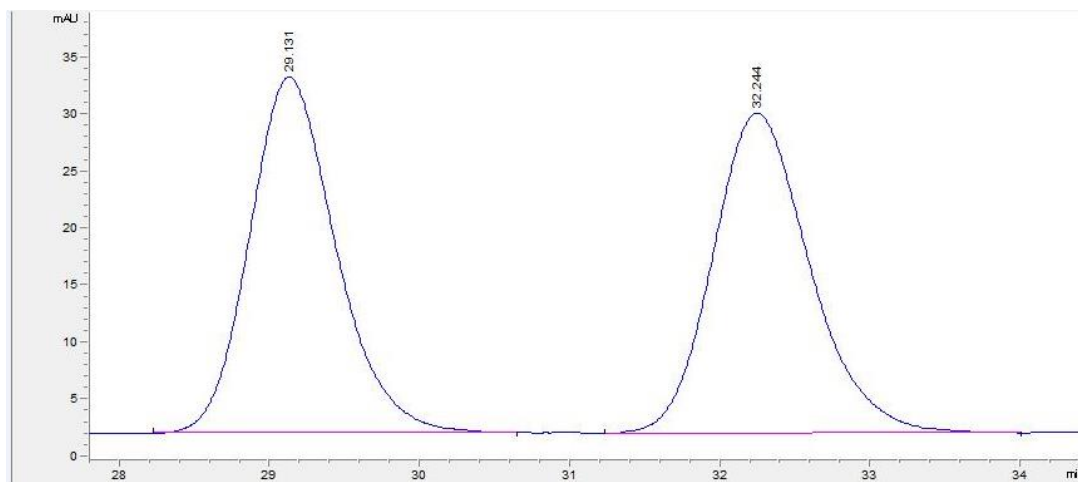

Area Percent Report

| Peak | RetTime [min] | Area [mAU*s] | Area % | Height [mAU] |
|------|---------------|--------------|--------|--------------|
| 1    | 29.131        | 1251         | 49.751 | 31.2         |
| 2    | 32.244        | 1263.5       | 50.249 | 28.1         |

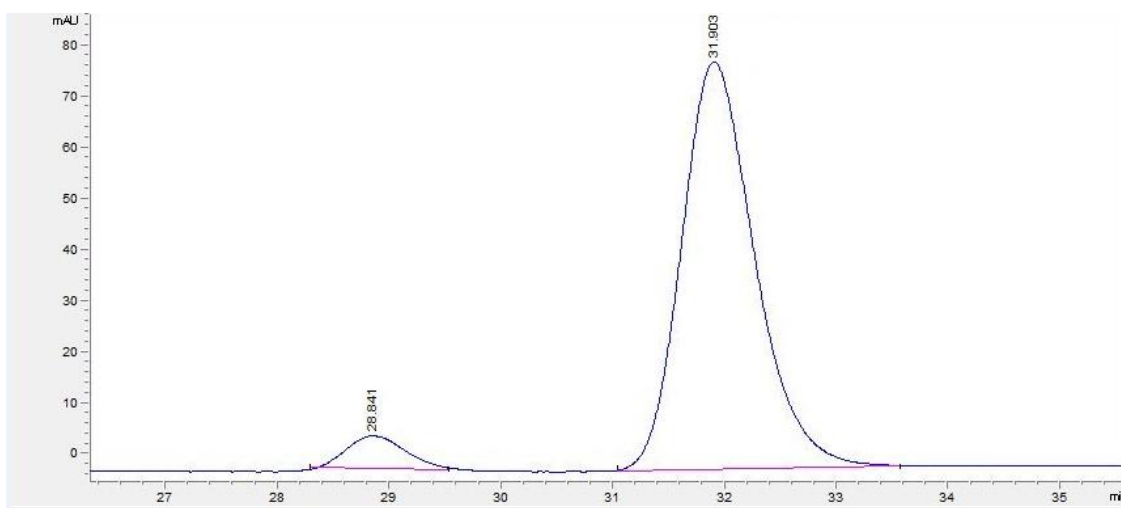

Area Percent Report

| Peak | RetTime [min] | Area [mAU*s] | Area % | Height [mAU] |
|------|---------------|--------------|--------|--------------|
| 1    | 28.841        | 238.6        | 6.139  | 6.5          |
| 2    | 31.903        | 3648.4       | 93.861 | 79.9         |

**(R)-methyl-2-(2-((4-methoxyphenyl)sulfonyl)-3-oxo-5-phenylisoindolin-1-yl)acetate (2k')**

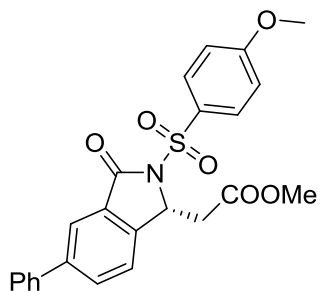

| Area Percent Report |               |              |        |              |
|---------------------|---------------|--------------|--------|--------------|
| Peak                | RetTime [min] | Area [mAU*s] | Area % | Height [mAU] |
| 1                   | 64.407        | 5262.9       | 50.464 | 51.2         |
| 2                   | 82.704        | 5166.1       | 49.536 | 38.3         |

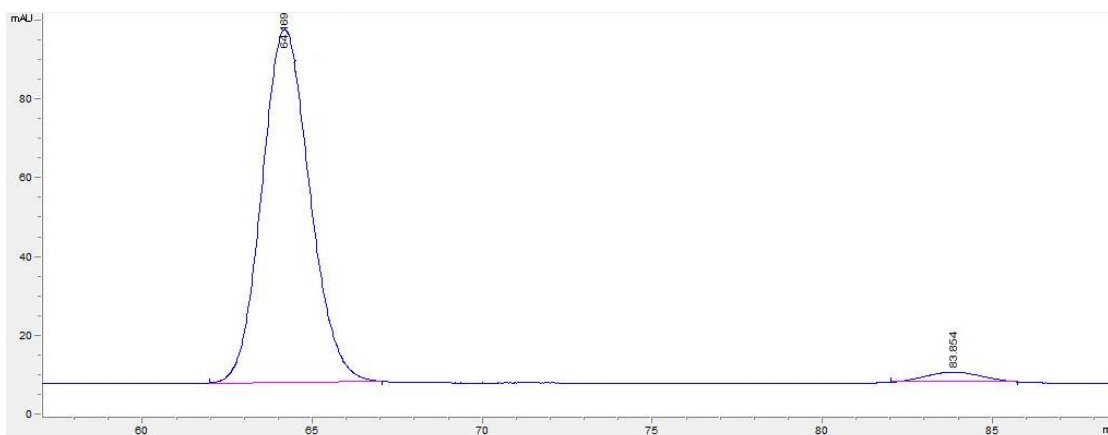

| Area Percent Report |               |              |        |              |
|---------------------|---------------|--------------|--------|--------------|
| Peak                | RetTime [min] | Area [mAU*s] | Area % | Height [mAU] |
| 1                   | 64.169        | 8813.9       | 96.681 | 89.7         |
| 2                   | 83.854        | 302.6        | 3.319  | 2.6          |
